# Supplementary material for: Population-wide active case finding and prevention for tuberculosis and leprosy elimination in Kiribati: the PEARL study protocol
Source: PubMed Central journal article supplement — BMJ Open. 2022 Apr 11;12(4):e055295. doi: 10.1136/bmjopen-2021-055295 (PMC9006843; doi:10.1136/bmjopen-2021-055295), 2022-04-11
Supplement: bmjopen-2021-055295.draft_revisions.pdf [file bmjopen-2021-055295.draft_revisions.pdf]

# BMJ Open

BMJ Open is committed to open peer review. As part of this commitment we make the peer review history of every article we publish publicly available.

When an article is published we post the peer reviewers' comments and the authors' responses online. We also post the versions of the paper that were used during peer review. These are the versions that the peer review comments apply to.

The versions of the paper that follow are the versions that were submitted during the peer review process. They are not the versions of record or the final published versions. They should not be cited or distributed as the published version of this manuscript.

BMJ Open is an open access journal and the full, final, typeset and author-corrected version of record of the manuscript is available on our site with no access controls, subscription charges or pay-per-view fees (<http://bmjopen.bmj.com>).

If you have any questions on BMJ Open's open peer review process please email [info.bmjopen@bmj.com](mailto:info.bmjopen@bmj.com)

# BMJ Open

## Population-wide active case finding and prevention for tuberculosis and leprosy elimination in Kiribati – the PEARL study protocol

|                               |                                                                                                                                                                                                                                                                                                                                                                                                                                                                                                                                                                                                                                                                                                                                                                                                                                                                                                                                                                                                                                                                                                                                                                                                                                                                                                                                                                                                                                                                                                          |
|-------------------------------|----------------------------------------------------------------------------------------------------------------------------------------------------------------------------------------------------------------------------------------------------------------------------------------------------------------------------------------------------------------------------------------------------------------------------------------------------------------------------------------------------------------------------------------------------------------------------------------------------------------------------------------------------------------------------------------------------------------------------------------------------------------------------------------------------------------------------------------------------------------------------------------------------------------------------------------------------------------------------------------------------------------------------------------------------------------------------------------------------------------------------------------------------------------------------------------------------------------------------------------------------------------------------------------------------------------------------------------------------------------------------------------------------------------------------------------------------------------------------------------------------------|
| Journal:                      | <i>BMJ Open</i>                                                                                                                                                                                                                                                                                                                                                                                                                                                                                                                                                                                                                                                                                                                                                                                                                                                                                                                                                                                                                                                                                                                                                                                                                                                                                                                                                                                                                                                                                          |
| Manuscript ID                 | bmjopen-2021-055295                                                                                                                                                                                                                                                                                                                                                                                                                                                                                                                                                                                                                                                                                                                                                                                                                                                                                                                                                                                                                                                                                                                                                                                                                                                                                                                                                                                                                                                                                      |
| Article Type:                 | Protocol                                                                                                                                                                                                                                                                                                                                                                                                                                                                                                                                                                                                                                                                                                                                                                                                                                                                                                                                                                                                                                                                                                                                                                                                                                                                                                                                                                                                                                                                                                 |
| Date Submitted by the Author: | 12-Jul-2021                                                                                                                                                                                                                                                                                                                                                                                                                                                                                                                                                                                                                                                                                                                                                                                                                                                                                                                                                                                                                                                                                                                                                                                                                                                                                                                                                                                                                                                                                              |
| Complete List of Authors:     | <p>Coleman, Mikaela; The University of Sydney, Faculty of Medicine and Health; Centenary Institute Medical Research Foundation, Tuberculosis Research Program</p> <p>Hill, Jeremy; The University of Sydney, Faculty of Medicine and Health; Centenary Institute Medical Research Foundation, Tuberculosis Research Program</p> <p>Timeon, Eretii; Government of the Republic of Kiribati Ministry of Health and Medical Services</p> <p>Tonganibeia, Alfred; Government of the Republic of Kiribati Ministry of Health and Medical Services</p> <p>Eromanga, Baraniko; Government of the Republic of Kiribati Ministry of Health and Medical Services</p> <p>Islam, Tauhid; World Health Organization Regional Office for the Western Pacific, Division of Programmes for Disease Control</p> <p>Trauer, James; Monash University, School of Public Health and Preventive Medicine</p> <p>Christensen, Amanda; Australian Respiratory Council</p> <p>Fox, Gregory; The University of Sydney, Faculty of Medicine and Health</p> <p>Marks, Guy; Woolcock Institute of Medical Research; University of New South Wales, South Western Sydney Clinical School</p> <p>Britton, Warwick; Royal Prince Alfred Hospital, Department of Clinical Immunology; Centenary Institute Medical Research Foundation, The University of Sydney</p> <p>Marais, B; The University of Sydney, Marie Bashir Institute for Infectious Diseases and Biosecurity; The University of Sydney, Faculty of Medicine and Health</p> |
| Keywords:                     | Tuberculosis < INFECTIOUS DISEASES, EPIDEMIOLOGY, Epidemiology < INFECTIOUS DISEASES, Public health < INFECTIOUS DISEASES, PUBLIC HEALTH, Infection control < INFECTIOUS DISEASES                                                                                                                                                                                                                                                                                                                                                                                                                                                                                                                                                                                                                                                                                                                                                                                                                                                                                                                                                                                                                                                                                                                                                                                                                                                                                                                        |
|                               |                                                                                                                                                                                                                                                                                                                                                                                                                                                                                                                                                                                                                                                                                                                                                                                                                                                                                                                                                                                                                                                                                                                                                                                                                                                                                                                                                                                                                                                                                                          |

SCHOLARONE™  
Manuscripts

**TITLE**

Population-wide active case finding and prevention for tuberculosis and leprosy elimination in Kiribati  
– the PEARL study protocol

**AUTHORS**

Mikaela Coleman,<sup>1,2</sup> Jeremy Hill,<sup>1,2</sup> Eretii Timeon,<sup>4</sup> Alfred Tonganibeia,<sup>4</sup> Baraniko Eromanga,<sup>4</sup> Tauhid Islam,<sup>5</sup> James M Trauer,<sup>6</sup> Amanda Christensen,<sup>7</sup> Greg J Fox,<sup>1,3</sup> Guy B Marks,<sup>3,8</sup> Warwick J Britton,<sup>1,2,9</sup> and Ben J Marais<sup>1,10</sup>

**CORRESPONDING AUTHOR**

Dr Mikaela Coleman

Room 5.17, The Centenary Institute,

The University of Sydney

Camperdown, 2050

New South Wales, Australia

Phone: +61 411 419 047

Email: mikaela.coleman@sydney.edu.au

**AUTHOR AFFILIATIONS**

1 - Faculty of Medicine and Health, The University of Sydney, Sydney, New South Wales, Australia

2 - Tuberculosis Research Program at the Centenary Institute, The University of Sydney, Sydney, New South Wales, Australia

3 - The Woolcock Institute of Medical Research, Glebe, New South Wales, Australia

4 - Ministry of Health and Medical Services, Tarawa, Kiribati

5 - End TB and Leprosy Unit, Division of Programmes for Disease Control, WHO Regional Office for the Western Pacific, Manila, Philippines

6 - Epidemiological Modelling Unit, School of Public Health and Preventive Medicine, Monash University, Melbourne, Victoria, Australia

7 - Australian Respiratory Council, Sydney, New South Wales, Australia

1  
2  
3 8 - South Western Sydney Clinical School, University of New South Wales, Sydney, New South  
4  
5 Wales, Australia

6  
7 9 - Department of Clinical Immunology, Royal Prince Alfred Hospital, Camperdown, New South  
8  
9 Wales, Australia

10  
11 10 - The University of Sydney Marie Bashir Institute for Infectious Diseases and Biosecurity, Sydney,  
12  
13 New South Wales, Australia.

14  
15  
16 **WORD COUNT:**

17  
18 Abstract: 300

19  
20 Strengths and limitations: 138

21  
22 Main text: 4597

23  
24 Contact and Funding: 144

25  
26 References: 52

27  
28 Tables: 3

29  
30 Figures: 2

31  
32 Supplement: 3

33  
34  
35 **KEYWORDS:**

36  
37 tuberculosis; TB; latent tuberculosis infection; LTBI; multidrug-resistant; MDR-TB; leprosy; Hansen's  
38  
39 disease; community-wide; population-wide; detection; treatment; intervention; active case finding;  
40  
41 proof-of-concept; preventive treatment; TPT; universal leprosy prophylaxis; mass chemoprophylaxis;  
42  
43 3HP; rifapentine; Pacific; Kiribati  
44  
45  
46  
47  
48  
49  
50  
51  
52  
53  
54  
55  
56  
57  
58  
59  
60

## ABSTRACT

### Introduction

Population-wide interventions offer a pathway to tuberculosis (TB) and leprosy elimination, but 'real-world' implementation in a high-burden setting using a combined approach has not been demonstrated. This implementation study aims to demonstrate the feasibility and evaluate the effect of population-wide screening, treatment and prevention on TB and leprosy incidence rates, as well as TB transmission.

### Methods and analysis

A non-randomised 'screen-and-treat' intervention conducted in the Pacific atoll of Tarawa, Kiribati. Households are enumerated and all residents  $\geq 3$  years, as well as children  $< 3$  years with recent household exposure to TB or leprosy, invited for screening. Participants are screened using tuberculin skin testing, signs and symptoms of TB or leprosy, digital chest X-ray with computer aided diagnosis (Delft CAD4TB®) and sputum evaluation (Xpert MTB/RIF Ultra®). Those diagnosed with disease are referred to the National TB and Leprosy Program for management. Participants with TB infection are offered TB preventive treatment (TPT) and those without TB disease or infection, or leprosy, offered universal leprosy prophylaxis. The primary study outcome is the difference in the annual TB case notification rate before and after the intervention. The effect on TB transmission will be measured by comparing the estimated annual risk of TB infection in primary school children (aged 7-15 years) before and after the intervention. The effect on leprosy is measured by comparing the leprosy case notification rate in Tarawa before and after the intervention, as well as comparing Tarawa (the intervention group) to the rest of Kiribati (the control group).

### Ethics

Approval has been obtained from the University of Sydney Human Research Ethics Committee (project no. 2021/127) and from the Kiribati Ministry of Health and Medical Services (MHMS).

### Dissemination

Findings will be shared with the Kiribati MHMS and local communities. It will also be published in peer-reviewed journals and presented at international conferences.

### STRENGTHS AND LIMITATIONS OF THIS STUDY

- The 'real-world' implementation approach will inform the feasibility and effectiveness of population-wide active TB and leprosy case finding and prevention strategies.
- Concurrent active TB case finding and infection detection with treatment, should durably reduce the TB disease burden by preventing future TB re-activation and reinfection.
- Combining TB and leprosy elimination efforts increases efficiency and could serve as a template for other countries with a dual disease burden, although this increases the complexity of the intervention.
- TB preventive treatment will be self-administered, which may result in lower adherence than with directly observed treatment (DOT), but is more feasible in the context of population-wide scale-up.
- Implementing this intervention in a Pacific island setting will demonstrate an important 'proof-of-principle' for population-wide interventions. Its findings should be generalizable to other Pacific and geographically circumscribed settings, with relevance for 'disease hot spots' globally.

## INTRODUCTION

Tuberculosis (TB, caused by *Mycobacterium tuberculosis*) is a leading infectious disease killer globally and in the Pacific,<sup>1</sup> while leprosy (caused by *M. leprae*) elimination remains a major challenge as well.<sup>2</sup> It is estimated that TB killed ~1.5 million people in 2019, despite being a preventable and curable disease.<sup>1</sup> At the 2018 United Nations High-Level Meeting on TB,<sup>3</sup> world leaders committed to step up TB elimination efforts, with improved TB case finding and expanded use of TB preventive treatment (TPT) identified as key interventions in the global “End TB strategy”.<sup>4</sup>

Historical population-wide TB elimination programmes demonstrated considerable success and are enjoying renewed attention, with specific emphasis on active case finding and prevention strategies<sup>5,6</sup>. A randomized controlled trial (RCT) in Vietnam recently demonstrated that population-wide active TB case finding can achieve substantial reductions in TB incidence and transmission.<sup>7</sup> Historic studies and modelling projections suggest that this effect, and its durability, can be enhanced by concurrent treatment of TB infection<sup>8,9</sup>, but data on ‘real-life’ implementation remain scarce. Given World Health Organization (WHO) endorsement of integrated active TB case finding and preventive treatment approaches,<sup>10-15</sup> there is urgency to develop implementation models that demonstrate feasibility and population impact.

Around 55% of the Kiribati population (53,748 from 2015 population census) lives on the capital atoll of Tarawa.<sup>16</sup> Of all TB cases detected in Kiribati in 2019, 76% (319 of 419) were from Tarawa - equating to a TB incidence of >500/100,000 population, the threshold incidence level above which the WHO recommends population-wide screening interventions.<sup>17</sup> *M. tuberculosis* strain typing data<sup>18</sup> and the dominance of young adults among TB cases indicate high levels of community transmission,<sup>19</sup> which emphasises the need for case finding and prevention strategies to be combined in order to prevent rapid re-infection.

Leprosy rates in Kiribati, and Tarawa in particular, are also among the highest in the world (>200 cases/100,000 population, compared to the WHO elimination threshold of 10/100,000 population) and have been rising rapidly after a nadir in the late 1990s when elimination efforts were discontinued.<sup>2</sup> Modelling studies done in Kiribati indicate that a single population-wide active case finding intervention,

1  
2  
3 combined with 'universal leprosy prophylaxis' using single-dose rifampicin, could dramatically decrease  
4 leprosy prevalence with a sustained effect.<sup>20</sup>  
5  
6  
7

8  
9 Although both TB and leprosy pose daunting public health challenges in this resource-limited setting,  
10 their co-occurrence within a geographically defined and isolated population presents a unique  
11 opportunity to evaluate combined elimination efforts. The aim of the proposed study is to achieve major  
12 reductions in TB and leprosy incidence and transmission in Tarawa, providing a pathway to future  
13 elimination. If successful, the proposed study will provide a template for TB and leprosy elimination  
14 efforts throughout the Pacific and in other remote settings.  
15  
16  
17  
18  
19

## 20 21 22 **METHODS AND ANALYSIS**

### 23 24 **Study Design**

25  
26 The PEARL study is a before and after evaluation of a population-wide systematic screening  
27 intervention, combined with a comprehensive treatment and prevention program for both tuberculosis  
28 and leprosy.  
29  
30  
31

### 32 33 34 **Setting**

35  
36 Kiribati is a lower-middle income country of ~120,000 people residing on low-lying atolls and islands in  
37 the western Pacific Ocean, with the lowest gross domestic product (GDP) per-capita of any country of  
38 Oceania<sup>21</sup>. The country has among the highest TB incidence rates in the world<sup>22</sup>, and is one of 23 WHO  
39 priority-countries for leprosy control<sup>23</sup>. Small numbers of people have been diagnosed with drug-  
40 resistant (DR) TB (3 out of 419 cases in 2019) with limited evidence of community transmission of drug-  
41 resistant TB. The prevalence of HIV infection is low, and no cases of TB/HIV coinfection were reported  
42 in 2019. However, there is a high burden of non-communicable disease, with the adult diabetes  
43 prevalence exceeding 20%,<sup>24</sup> high rates of childhood malnutrition and substantial levels of smoke  
44 exposure from cooking fires and cigarette smoking.<sup>25</sup>  
45  
46  
47  
48  
49  
50  
51  
52  
53

54  
55 The Tarawa atoll serves as the capital of Kiribati. Residents of South Tarawa, Betio Islet and the small  
56 communities of Buota and Abatao at the southernmost end of North Tarawa are included in the  
57 intervention and referred to as 'Tarawa'. Tarawa accommodates ~55% of the Kiribati population and  
58  
59  
60



1  
2  
3 has the highest rates of TB and leprosy disease. Betio Islet in particular is the most densely populated  
4 area in the Pacific with an estimated population density of >15,000 people/km<sup>2</sup>.  
5  
6  
7

8  
9 TB diagnostics available in Tarawa include smear microscopy, Xpert MTB/RIF (Cepheid, Sunnyvale,  
10 California) and chest radiography, but culture facilities are unavailable. Sputum samples can be sent to  
11 the regional reference laboratory in Adelaide, Australia, for culture and susceptibility testing. However,  
12 this is problematic due to logistical issues and high rates of bacterial overgrowth. Most people with TB  
13 are hospitalised during the first few weeks of treatment at the local government hospital (Betio and  
14 Tungaru hospitals). Household contact investigation is advised, but not universally implemented  
15 because of resource constraints. National guidelines recommend preventive treatment for household  
16 contacts for whom TB disease has been excluded, but implementation and uptake are again  
17 inconsistent. Leprosy is diagnosed using clinical assessment and microscopy, with genotypic diagnosis  
18 available by sending punch biopsy samples to the regional reference laboratory in Christchurch, New  
19 Zealand. Curative treatment, occupational therapy and chronic disease management is provided by the  
20 National Leprosy Program. Post-exposure prophylaxis of household contacts using single-dose  
21 rifampicin (SDR) has been scaled up in recent years with the help of the Pacific Leprosy Foundation.  
22  
23  
24  
25  
26  
27  
28  
29  
30  
31  
32  
33  
34  
35

### 36 **Study population**

37 The study population comprises all residents of Tarawa aged three and above, with children <3 years  
38 additionally included if they have documented household contact with someone who had TB (in the  
39 past 1 year), or leprosy (at any time since they were born). Household contact is defined by regular  
40 meals being prepared in the same kitchen. See Table 1 for overview of inclusion and exclusion criteria.  
41  
42 Study recruitment is guided by identification of all 'places of residence' using high resolution satellite  
43 images. All identified residences are visited by study workers to enumerate household members, collect  
44 baseline data, ascertain the eligibility of children aged <3 years of age and invite everyone to an  
45 assigned screening day.  
46  
47  
48  
49  
50  
51  
52  
53  
54

### 55 **Study intervention**

56 The study intervention comprises population-wide systematic screening and treatment of TB disease,  
57 TB infection and leprosy, together with the provision of leprosy prophylaxis to those not requiring  
58  
59  
60

1  
2  
3 treatment. In practice this equates to universal leprosy prophylaxis, given that TB and leprosy treatment,  
4 as well as TPT with rifamycin-based regimens, provides adequate leprosy prophylaxis. The enrolment  
5 and screening process are summarised in Figure 1; more detailed algorithms are included in the  
6 supplement (Figures S1 and S2).  
7  
8  
9

### 10 11 12 **Systematic screening procedures**

13  
14 All households are enumerated and eligible participants invited for screening. During the first clinic visit,  
15 study personnel obtain written informed consent from adult participants ( $\geq 18$  years of age), or  
16 parents/legal guardians in those aged  $< 18$  years, with verbal assent from children aged 10-18 years.  
17  
18 Participants provide a 'selfie' to aid future re-identification, using biometric (facial coordinate) analyses  
19 (SimPrints Technology Limited, Cambridge, UK). Study nurses complete a short TB symptom  
20 questionnaire and a brief physical examination for signs and symptoms suggestive of TB disease  
21 (especially extrapulmonary signs such as a visible cervical lymph node mass or gibbus) or leprosy  
22 (insensate or hypopigmented skin patches, or suggestive deformities).  
23  
24  
25  
26  
27  
28  
29

30  
31 A TST is placed using the Mantoux method and sputum collection attempted in all participants aged  
32  $\geq 10$  years; age appropriate diagnostic specimens may be collected in children  $< 10$  years who have  
33 symptoms suggestive of TB, but it is not part of the screening procedure. Sputum specimens are tested  
34 using Xpert MTB/RIF Ultra®, recently endorsed by WHO as a sensitive front-line diagnostic test<sup>26</sup>. A  
35 digital chest radiograph (CXR) is performed on everyone aged  $\geq 10$  years, and children aged  $< 10$  years  
36 with symptoms suggestive of TB. Delft CAD4TB is used to assist CXR interpretation for participants  
37 aged  $\geq 10$  years, especially those without any TB concern. The use of CAD software for TB screening,  
38 including the Delft CAD4TB® system used in this study, is supported by recent WHO guidelines<sup>27</sup>.  
39 Studies using Delft CAD4TB® software have demonstrated very high negative predictive values with a  
40 CAD score of less than 50<sup>28</sup>. CXRs for younger participants will be interpreted by study medical staff.  
41  
42  
43  
44  
45  
46  
47  
48  
49  
50  
51

52  
53 At a second clinic visit two days later, the TST is read and considered positive if induration is  $\geq 10$ mm,  
54 or  $\geq 5$ mm if the participant has had household contact with a person with infectious TB in the past 12  
55 months. The CXRs of all participants with a CAD score of  $\geq 50$  (and a random selection of those with  
56 scores  $< 50$ ), a positive Xpert Ultra® or symptoms suggestive of TB (especially children  $< 10$  years) will  
57  
58  
59  
60

1  
2  
3 be manually reviewed by a study doctor. Patients with confirmed or clinically diagnosed TB disease or  
4 leprosy will be referred to the Kiribati NTP or NLP for treatment; with close coordination between study  
5 and program clinicians.  
6  
7  
8  
9

### 10 ***TPT eligibility***

11  
12 Participants with a positive TST or children <5 years with recent household contact are considered for  
13 TPT if they do not have TB disease and have not completed a course of TB treatment or TPT within  
14 the last 12 months. Potential TPT contraindications (eg. allergies to TB medicines, risk factors for  
15 hepatotoxicity) are assessed using a brief questionnaire. There is a high prevalence of hepatitis B (HBV)  
16 infection among older people in Kiribati;<sup>29</sup> routine HBV vaccination introduced in the 1990s reduced  
17 infection rates among younger people<sup>30</sup>. A point-of-care HBV rapid test (Determine™ HBsAg 2) is  
18 performed in all participants aged ≥40 years who agree to TPT and are otherwise at low risk, since they  
19 are at increased risk of HBV infection and possible liver disease. Participants diagnosed with HBV  
20 infection are referred to the HBV treatment programme for management.  
21  
22  
23  
24  
25  
26  
27  
28  
29  
30  
31

### 32 ***Hepatotoxicity risk assessment***

33  
34 Baseline serum alanine aminotransferase (ALT) testing is conducted in all participants aged ≥60 years,  
35 or with identified risk factors for hepatotoxicity, and results stratified according to hepatotoxicity risk  
36 (Table 2). Participants with ALT ≥3x upper limit of normal (ULN) are not offered TPT, those with ALT 2-  
37 3x ULN are offered TPT (if the bilirubin in <2x ULN) with repeat ALT testing after 3-4 weeks, and  
38 participants with ALT <2x ULN (or no need for a baseline test) are offered TPT without further ALT  
39 monitoring. All participants receive information on the signs and symptoms of hepatotoxicity, guidance  
40 to limit alcohol and kava intake and access to a 'hotline' linked to a rapid evaluation service.  
41  
42  
43  
44  
45  
46  
47  
48

### 49 ***TPT regimens and treatment initiation***

50  
51 Participants who are eligible, have no contraindications and accept TPT are offered a choice of short-  
52 course rifamycin-based regimens according to clinical characteristics, patient preference and  
53 availability. Currently used regimens are: 12 weekly doses of isoniazid and rifapentine (3HP), four  
54 months of daily rifampicin (4R), or 3 months of daily isoniazid and rifampicin (3RH, preferred for young  
55 children due to availability of child-friendly water-dispersible formulations). Dosing is chosen according  
56  
57  
58  
59  
60

1  
2  
3 to recommendations from the WHO and the Kiribati NTP. In participants with a documented history of  
4 household contact with someone diagnosed with drug-resistant TB, TPT using six months of daily  
5 levofloxacin is considered under expert supervision<sup>31 32</sup>. New evidence and normative guidance  
6  
7 supporting the use of shorter TPT regimens may be released during the study. Consistent with the  
8  
9 implementation approach, additional regimens may be offered to participants in collaboration with the  
10  
11 Kiribati NTP and with updated ethical approval. All medicines used in the study will be obtained from  
12  
13 WHO prequalified manufacturers, procured from the Global Drug Facility (GDF).  
14  
15  
16  
17

### 18 ***Community-based adherence support and treatment monitoring for TPT***

19  
20 At each stage of treatment initiation, adherence support, treatment monitoring, management of adverse  
21  
22 events and assignment of treatment outcome, participants are provided with appropriate counselling on  
23  
24 risks, benefits and options available. A detailed patient information sheet is provided together with group  
25  
26 and/or individual counselling with the aid of an illustrated flip chart and a 'TPT passport' (Figure S3) to  
27  
28 assist adherence and adverse event monitoring. After taking the first dose under direct supervision,  
29  
30 TPT will be self-administered with use of pragmatic adherence support strategies tailored to the  
31  
32 particular study community. Medicines are dispensed every four weeks, or according to patient  
33  
34 preference. All participants who commence TPT are contacted once after 3-4 weeks to support  
35  
36 adherence and screen for adverse events, and again when they near TPT completion to assess  
37  
38 treatment adherence and either extend treatment or assign a treatment outcome. Treatment completion  
39  
40 is determined according to WHO recommendations (Table 3).  
41  
42  
43

### 44 ***Detection and management of adverse events***

45  
46 This is an implementation study that uses medicines recommended by the NTP in Kiribati and which  
47  
48 have been shown to be safe and effective<sup>10 33-38</sup>. Adverse events associated with the study intervention  
49  
50 are similar to those encountered in routine programme delivery. Misidentification and misclassification  
51  
52 during screening steps may be detected at follow-up visits. These will be minimised through adequate  
53  
54 planning and testing of all procedures, using ongoing quality assurance measures built into a secure  
55  
56 Research Electronic Data Capture (REDCap) database<sup>39</sup> and close oversight from local study  
57  
58 coordinators. Actions on referrals to government treatment programs (TB, leprosy, hepatitis) will be  
59  
60 tracked.

1  
2  
3  
4  
5 Participants receiving TPT will have access to a 'TPT hotline' as well as a walk-in service for adverse  
6 event assessment. Study staff are trained to identify the most common and most severe adverse events  
7 associated with TPT, with a particular focus on hepatotoxicity. Drug-related adverse events are triaged  
8 and referred for further medical evaluation as appropriate, including liver function testing. If needed,  
9 referral and linkage to urgent care services is available.  
10  
11  
12  
13  
14  
15

16 The following adverse events will be recorded and reported as part of the study:

- 17 • Misclassification or misinterpretation of screening results resulting in mistreatment
- 18 • Post-positive screen treatment delay for TB disease (>7 days) and leprosy (>14 days)
- 19 • Drug-induced liver injury (DILI - defined as suggestive symptoms plus ALT >3 times upper limit  
20 of normal or ALT >5 times upper limit of normal without symptoms) while on TPT
- 21 • Drug-related adverse events resulting in TPT interruption or cessation<sup>40</sup>
- 22 • All serious adverse events among people taking TPT (SAEs, as defined by the Australian  
23 National Health and Medical Research Council)<sup>41</sup>.
- 24  
25  
26  
27  
28  
29  
30  
31

32 Anyone with DILI during treatment or with an abnormal ALT ( $\geq 2x$  ULN) at baseline will receive an HBV  
33 rapid test (if not previously performed). In addition, blood drawn from participants with DILI and matched  
34 controls will be stored (with additional consent) for expanded risk factor determination, using an efficient  
35 nested case-control study design.  
36  
37  
38  
39  
40

### 41 ***Leprosy prophylaxis***

42 Single dose rifampicin for leprosy prophylaxis is offered to participants who do not commence any other  
43 form of treatment. Those who commence treatment for TB or leprosy, or TPT, already receive multiple  
44 doses of a rifamycin as part of those regimens, which constitutes effective leprosy prophylaxis. SDR is  
45 dosed according to WHO age and weight bands (with dispersible tablets for children <25kg)<sup>42</sup> and is  
46 given as directly observed treatment (DOT). Single dose rifampicin is well tolerated and widely used for  
47 post-exposure prophylaxis in household contacts of people with leprosy<sup>43 44</sup> and recognised as an  
48 effective measure to reduce leprosy prevalence if applied at a population scale in high incidence  
49 settings<sup>20 44 45</sup>. Among published studies evaluating leprosy prophylaxis, SDR was reported to be safe  
50 with no observed SAEs<sup>43</sup>, and we are not aware of any SAEs reported during programmatic  
51  
52  
53  
54  
55  
56  
57  
58  
59  
60

1  
2  
3 implementation. Offering either single dose rifampicin, TPT, TB treatment and/or leprosy treatment to  
4 every participant equates to universal leprosy prophylaxis.  
5  
6  
7

## 8 **Outcome measures**

### 9 **Primary outcome**

10  
11 The primary outcome measure of this study is the difference between TB case notification rates in  
12 Tarawa, recorded from NTP data, during the 12 months before the intervention (2020) and the 12  
13 months after it concludes (2024/5). The denominator is the population of Tarawa, as reported by the  
14 National Statistics Office. This outcome measure has been chosen to reflect the programmatic intent of  
15 the intervention, and the aim of the study to effect a step-change in TB prevalence as a pathway to  
16 elimination. Annual TB notification rates will be monitored throughout the study period and are expected  
17 to first increase as a result of active case finding, before declining towards the end of the intervention  
18 and after its completion.  
19  
20  
21  
22  
23  
24  
25  
26  
27  
28  
29

### 30 **Secondary outcomes**

- 31  
32 1. Estimated relative annual risk of TB infection (ARTI) among primary school children (aged 8-  
33 10 years) in Tarawa, measured by TST at the start of the intervention and in a comparable  
34 stratum of children at least 6 months after the intervention.  
35
- 36  
37 2. Population prevalence of TST positivity in different age bands.  
38
- 39  
40 3. Description of the observed disease spectrum among people with TB and/or leprosy.  
41
- 42  
43 4. Comparison of TB case notification rates in Tarawa (the intervention site) and the rest of Kiribati  
44 (control) before, during and after the intervention.  
45
- 46  
47 5. Percentage of participants retained at each step along the 'cascade of care'<sup>46</sup> (invited to  
48 screening, TST placed, TST read, completed screening, offered TPT, commenced TPT,  
49 completed TPT).  
50
- 51  
52 6. Diagnostic yield of mobile digital CXRs with computer-aided detection (CAD), compared to  
53 sputum testing using Gene Xpert Ultra®, in patients who had both tests performed  
54
- 55  
56 7. Incidence rate of DILI among people taking TPT, and the population attributable fraction of HBV  
57 infection and other documented risk factors  
58  
59  
60

- 1
- 2
- 3 8. Difference in leprosy case notification rates in Tarawa, recorded from NLP data, during the 12
- 4 months before the intervention (2020) and the 12 months after its conclusion (2024/5).
- 5
- 6
- 7 9. Comparison of leprosy case notification rates in Tarawa (the intervention site) and the rest of
- 8 Kiribati (control) before, during and after the intervention.
- 9
- 10
- 11 10. Detailed spatial analysis of TB and leprosy cases detected during the intervention, including
- 12 relevant demographic, socioeconomic, environmental and geographic risk factors
- 13
- 14
- 15 11. Documenting the cost of the combined intervention, as well as TB and leprosy components
- 16 separately, to estimate the incremental cost-effectiveness ratio in comparison to modelled
- 17 outcomes without the intervention
- 18
- 19
- 20
- 21
- 22

### 23 **Sample Size**

24 For systematic screening and treatment, the sample size for the intervention is the whole population of  
25 Tarawa aged  $\geq 3$  years (53,748 people from 2015 population census, and currently estimated to be  
26  $\sim 55,000$  people). The secondary ARTI outcome is calculated from estimated TB infection prevalence  
27 using the formula  $ARTI = 1 - (1 - TB\ infection\ prev)^{1/a}$ , where  $a =$  mean age, estimated as 1.8% / year  
28 in primary school-aged children (mean age 9 years, LTBI prevalence 15%)<sup>47</sup>. The ability to detect a  
29 50% reduction in ARTI with a power of 0.8 (alpha of 0.05), comparing two samples of children at  
30 baseline and after the intervention, requires a sample size of 2,580 children at each measurement  
31 (G\*Power 3.1)<sup>48</sup>. Primary school-aged children will be representatively sampled from the same age  
32 categories and schools at both measurements.  
33  
34  
35  
36  
37  
38  
39  
40  
41  
42  
43

### 44 **Governance**

45 The Study Management Committee (responsible for day-to-day running and monitoring of the study) is  
46 composed of the Kiribati-based medical lead, an i-Kiribati doctor nominated by the Kiribati MHSM, the  
47 Kiribati-based nursing lead, the study coordinator, the overall study lead and the education coordinator.  
48 All SAEs are reported within 1 week of its recognition to the University of Sydney Human Research  
49 Ethics Committee and the Kiribati MHMS by the study coordinator. An independent Data Safety and  
50 Monitoring Board (DSMB) will assess study progress and the adverse events recorded and reported as  
51 described above. Figure 2 provides an overview of government arrangements.  
52  
53  
54  
55  
56  
57  
58  
59  
60

## **ETHICS AND DISSEMINATION**

### **Ethical issues**

Adults aged  $\geq 18$  years will provide written informed consent. Children aged  $< 18$  years will require written parental or caregiver consent, with those aged 10-18 years asked to give verbal assent that is recorded. Participants may voluntarily withdraw from the study at any time. All records are strictly confidential, and all study data will be collected on password-protected electronic devices. A complete database will be stored on a high security data repository administered by the University of Sydney in Sydney, Australia. Relevant data will be extracted for the Kiribati MHMS and NTP as required for clinical or public health purposes, and made available at study completion for future patient care and population benefit.

### **Dissemination**

Study findings will be presented at international conferences and submitted for publication in peer-reviewed journals. Future authorship will include all substantial contributors to the work and there will be a statement of the role of the funder and any potential conflicts of interest. There will be due recognition and acknowledgement of study participants, local study staff and contributions made by i-Kiribati colleagues. There is an overarching commitment to involve i-Kiribati colleagues in all aspects of the study design and execution and to invest in local capacity building. Interim and final reports will be shared with the Kiribati MHMS, with regular updates provided to the Kiribati public and study participants.

### **Patient and Public Involvement**

There was no patient involvement in the design of the study. The study is strongly aligned with national priorities in Kiribati, which recognises TB and leprosy as major infectious disease challenges. The study was informed by the need for an urgent TB and leprosy control solution in Kiribati, as articulated by the Kiribati MHMS. A community Stakeholder Engagement Group (SEG) comprised of i-Kiribati TB and leprosy survivors, local lay leadership and health practitioners will provide community feedback and guidance throughout the intervention period. Patient advisors will be thanked in the acknowledgements of future study publications. Testing bold TB elimination strategies in the Pacific is also aligned with the 'Regional Framework for Action on Implementation of the End TB Strategy in the Western Pacific'<sup>49</sup>.



1  
2  
3 The framework calls for a paradigm shift in TB control and articulates a need to “integrate diagnosis  
4 and management of LTBI into systematic screening for TB disease among high-risk populations”<sup>49 50</sup>.  
5  
6  
7  
8

### 9 **Training, monitoring and evaluation**

10 Building skills, knowledge and workforce capacity is seen as an essential component of the study.  
11 Regular staff development training will be conducted by the Australian Respiratory Council. Senior  
12 research staff and the Kiribati MHMS will conduct ongoing internal monitoring. Data quality control and  
13 critical review of processes will be performed on a weekly basis throughout the study by the study  
14 coordinator. Protocol compliance, recruitment, screening and treatment practice, and laboratory  
15 processes will be externally reviewed on a quarterly basis, with physical inspection whenever possible.  
16  
17  
18  
19  
20  
21  
22  
23

### 24 **Data management and analysis**

25 Data will be collected offline in a standardised fashion and captured on electronic tablets, with daily  
26 upload into a secure web-based REDcap database.<sup>39</sup> Participants will be assigned a unique study  
27 identifier, which will be matched with a facial coordinate scan (SimPrints, Cambridge, UK) at enrolment  
28 and will add security to subsequent retrieval of patient records. The study coordinator will review data  
29 uploads on a daily basis. At the end of the intervention and while awaiting conduct of the final TST  
30 survey among school children, we will complete data cleaning and start analysis. At this time, we will  
31 also consolidate the transfer of knowledge and skills and focus on assisting the Kiribati MHMS with  
32 longer term planning. A detailed data analysis plan will be drafted focusing on the primary and  
33 secondary outcome measures articulated above. In order to assess the durability of the effect we will  
34 track annual TB and leprosy case notification numbers beyond the end of the project, which should also  
35 inform future interventions and complementary studies.  
36  
37  
38  
39  
40  
41  
42  
43  
44  
45  
46  
47  
48

### 49 **DISCUSSION**

50 Ambitious action is needed to change the course of the global TB epidemic, and to make up ground  
51 lost to the COVID-19 pandemic. Scaling up access to systematic screening and TPT for high-burden  
52 communities has been identified as a key intervention to achieve this,<sup>51</sup> and is reflected in multilateral  
53 targets and commitments. For example, at the UN High Level Meeting on TB held in 2018, countries  
54 committed to providing 20 million courses of TPT to HIV-negative adult household contacts. Less than  
55  
56  
57  
58  
59  
60

1  
2  
3 1% of this target has been met, despite abundant evidence that these individuals are at high risk of  
4 developing TB and perpetuating the cycle of transmission at the community level.  
5  
6  
7

8  
9 Recently published WHO guidelines on systematic screening for TB recommend that population level  
10 systematic screening can be adopted where the estimated incidence is above 500/100,000 – this  
11 threshold is met in Tarawa. Current WHO TPT guidelines state that population-based LTBI testing and  
12 treatment is not considered feasible in the absence of locally available tests for LTBI and reliable tests  
13 to rule out TB disease, and while it is recognised that it may assist TB elimination efforts, the public  
14 health benefit remains unproven<sup>32</sup>. A population-wide intervention to diagnose and treat TB disease  
15 and infection was recently implemented in the Marshall Islands; the ‘TB and Leprosy Free Majuro’<sup>52</sup>  
16 project demonstrated the safety and feasibility of this approach in a Pacific context. For leprosy, WHO  
17 acknowledges that universal leprosy prophylaxis, in addition to active case finding, can be valuable to  
18 assist elimination efforts,<sup>43</sup> which presents a major opportunity for combined TB and leprosy elimination  
19 efforts.  
20  
21  
22  
23  
24  
25  
26  
27  
28  
29

30  
31  
32 Implementing a comprehensive TB elimination strategy in Tarawa has important benefits for TB control.  
33 First, population-wide active case finding will facilitate early TB disease detection and treatment,  
34 reducing associated morbidity and mortality and limiting ongoing TB transmission within the community.  
35 Second, detection and treatment of LTBI will reduce future disease re-activation and greatly increase  
36 the durability of the positive impact achieved by the intervention. The feasibility of such an ambitious  
37 project is highly dependent on support from the people of Tarawa, strong political commitment from the  
38 Kiribati government and cooperation with relevant partners and stakeholders. Third, this study will  
39 provide detailed information on the prevalence of TB infection, active TB and leprosy, and document  
40 the impact of population-wide screening approaches to inform modelling of TB and leprosy control  
41 strategies in the Pacific<sup>9 20</sup>.  
42  
43  
44  
45  
46  
47  
48  
49  
50

51  
52  
53 Beyond the domain of TB control, this study will also strengthen the health system of Kiribati. Updated  
54 household- and individual-level information collected during the study will facilitate public health  
55 interventions in other disease areas as well. Leprosy screening is included in the main intervention, and  
56 a proportion of participants will be screened for HBV; these activities will be accompanied by system  
57  
58  
59  
60

1  
2  
3 changes that align the efforts of the three disease control programmes and could serve as an example  
4 in other areas. Strengthened laboratory and radiology capacity will have benefits for the health system  
5 overall: for example, expansion of access to GeneXpert and CAD systems would both be of direct  
6 benefit in the event of a COVID-19 outbreak. Ultimately, this study is aligned with national and regional  
7 priorities for health system strengthening and universal health care.  
8  
9  
10  
11  
12

13  
14 Study limitations include the reliance on case notification rates as our primary outcome measure, which  
15 reflect the operational nature of the intervention. However, we will also compare ARTI, which provides  
16 an objective marker of community transmission, and track active case finding, treatment and prevention  
17 rates throughout the intervention. Early diagnosis and treatment of cases through active case finding  
18 using sensitive tests may increase the measured effect due to lead time bias, but the effect is expected  
19 to be small given that all participants with TB infection will receive either TB treatment or TPT. We will  
20 also continue monitoring of the intervention effect beyond the life of the project.  
21  
22  
23  
24  
25  
26  
27  
28  
29

30 The PEARL study benefits from extensive collaboration with the Kiribati MHMS and NTP, as well as  
31 established partnerships with the WHO Western Pacific Regional Office (Manila, Philippines), the office  
32 of the WHO Representative in the South Pacific (Suva, Fiji), the United Nations Development Program  
33 (UNDP) and the Australian Department of Foreign Affairs and Trade (DFAT) amongst others. In  
34 addition, extensive community engagement, communication and mobilisation forms the cornerstone of  
35 study implementation. Pacific Island Nations like Kiribati are in a unique position, given their geographic  
36 isolation and limited population size, to 'lead the way' by implementing ambitious elimination strategies  
37 that serve as proof-of-principle for others to learn from and replicate.  
38  
39  
40  
41  
42  
43  
44  
45  
46

## 47 **CONCLUSION**

48  
49 The PEARL study addresses the need for rigorous implementation science to assess the feasibility and  
50 impact of population-wide active case finding and treatment, combined LTBI detection and treatment,  
51 to durably reduce the TB burden in high incidence settings. The study also explores complementarity  
52 between TB and leprosy elimination efforts, with the promise of developing scalable strategies suitable  
53 for remote settings with high disease burdens.  
54  
55  
56  
57  
58  
59  
60

1  
2  
3  
4  
5  
6  
7  
8  
9  
10  
11  
12  
13  
14  
15  
16  
17  
18  
19  
20  
21  
22  
23  
24  
25  
26  
27  
28  
29  
30  
31  
32  
33  
34  
35  
36  
37  
38  
39  
40  
41  
42  
43  
44  
45  
46  
47  
48  
49  
50  
51  
52  
53  
54  
55  
56  
57  
58  
59  
60

For peer review only

### Contact for public and scientific queries

The contact for scientific and public queries is the Principal Investigator, Professor Ben Marais ([ben.marais@sydney.edu.au](mailto:ben.marais@sydney.edu.au)).

### Study status

Advanced preparation

### Contributors

BJM wrote the initial study proposal. MC and JH contributed equally to this paper. MC, JH, GJF, ET, AT, BE, TI, JMT, AC, GBM, WJB and BJM made important intellectual contributions to the final study protocol. GBM and GJF performed sample size calculations. MC prepared the first draft of the manuscript. The funding agency played no part in any aspect of the study, nor the decision to submit this manuscript for publication.

### Competing interests

None declared.

### Funding

This work is supported by the Australian Medical Research Future Fund (MRFF) grant, APP1200755. The investigators are also supported by the National Health and Medical Research Council Centre of Research Excellence in Tuberculosis Control on both sides of the border (APP1153493).

1  
2  
3 **REFERENCES**  
4

- 5 1. WHO. Global Tuberculosis Report 2020. In: World Health Organisation WTP, ed.  
6 <https://www.who.int/publications/i/item/9789240013131>, 2020.  
7  
8
- 9 2. Chambers ST, Iotaba N, Timeon E, et al. Surveillance of Leprosy in Kiribati, 1935–2017. *Emerging*  
10 *Infectious Diseases* 2020;26(5):833.  
11  
12
- 13 3. WHO. Political declaration of the UN General-Assembly High-Level Meeting on the Fight Against  
14 Tuberculosis. In: World Health Organisation WTP, ed.  
15 [https://www.who.int/publications/m/item/political-declaration-of-the-un-general-assembly-high-](https://www.who.int/publications/m/item/political-declaration-of-the-un-general-assembly-high-level-meeting-on-the-fight-against-tuberculosis)  
16 [level-meeting-on-the-fight-against-tuberculosis](https://www.who.int/publications/m/item/political-declaration-of-the-un-general-assembly-high-level-meeting-on-the-fight-against-tuberculosis), 2019.  
17  
18  
19
- 20 4. WHO. The END TB Strategy. [https://www.who.int/tb/strategy/End\\_TB\\_Strategy.pdf](https://www.who.int/tb/strategy/End_TB_Strategy.pdf), 2014.  
21  
22
- 23 5. MSF. Step up for TB report 2020. In: partnership TST, ed. <https://www.msf.org/step-tb-report-2020>,  
24 2020.  
25
- 26 6. Comstock GW, Ferebee SH, Hammes LM. A controlled trial of community-wide isoniazid  
27 prophylaxis in Alaska. *Am Rev Respir Dis* 1967;95(6):935-43. doi:  
28 10.1164/arrd.1967.95.6.935 [published Online First: 1967/06/01]  
29  
30
- 31 7. Marks GB, Nguyen NV, Nguyen PTB, et al. Community-wide Screening for Tuberculosis in a High-  
32 Prevalence Setting. *N Engl J Med* 2019;381(14):1347-57. doi: 10.1056/NEJMoa1902129  
33 [published Online First: 2019/10/03]  
34  
35
- 36 8. Dye C, Glaziou P, Floyd K, et al. Prospects for tuberculosis elimination. *Annu Rev Public Health*  
37 2013;34:271-86. doi: 10.1146/annurev-publhealth-031912-114431 [published Online First:  
38 2012/12/19]  
39  
40
- 41 9. Ragonnet R, Williams BM, Largen A, et al. Estimating the long-term effects of population-wide  
42 screening for latent and active tuberculosis in the Republic of the Marshall Islands. *medRxiv*  
43 2021:2021.03.03.21252859. doi: 10.1101/2021.03.03.21252859  
44  
45
- 46 10. Churchyard GJ, Swindells S. Controlling latent TB tuberculosis infection in high-burden countries:  
47 A neglected strategy to end TB. *PLoS Med* 2019;16(4):e1002787. doi:  
48 10.1371/journal.pmed.1002787 [published Online First: 2019/04/24]  
49  
50
- 51 11. Getahun H, Matteelli A, Chaisson RE, et al. Latent Mycobacterium tuberculosis infection. *N Engl J*  
52 *Med* 2015;372(22):2127-35. doi: 10.1056/NEJMra1405427 [published Online First:  
53 2015/05/29]  
54  
55  
56  
57  
58  
59  
60

- 1  
2  
3 12. Houben RM, Dodd PJ. The Global Burden of Latent Tuberculosis Infection: A Re-estimation Using  
4  
5 Mathematical Modelling. *PLoS Med* 2016;13(10):e1002152. doi:  
6  
7 10.1371/journal.pmed.1002152 [published Online First: 2016/10/26]  
8  
9 13. Saunders MJ, Evans CA. Ending Tuberculosis through Prevention. *N Engl J Med*  
10  
11 2019;380(11):1073-74. doi: 10.1056/NEJMe1901656 [published Online First: 2019/03/14]  
12  
13 14. Rangaka MX, Cavalcante SC, Marais BJ, et al. Controlling the seedbeds of tuberculosis:  
14  
15 diagnosis and treatment of tuberculosis infection. *Lancet* 2015;386(10010):2344-53. doi:  
16  
17 10.1016/s0140-6736(15)00323-2 [published Online First: 2015/10/31]  
18  
19 15. WHO. WHO operational handbook on tuberculosis: module 1: prevention: tuberculosis preventive  
20  
21 treatment. 2020  
22  
23 16. Group WB. Kiribati Health Financing System Assessment: Spend Better. In: Bank W, ed.  
24  
25 Washington, DC 2018.  
26  
27 17. Organization WH. The end TB strategy: World Health Organization, 2015.  
28  
29 18. Aleksic E, Merker M, Cox H, et al. First molecular epidemiology study of Mycobacterium  
30  
31 tuberculosis in Kiribati. *PLoS One* 2013;8(1):e55423. doi: 10.1371/journal.pone.0055423  
32  
33 [published Online First: 2013/02/06]  
34  
35 19. Morishita F VK, Lowbridge C, Rahevar K, Islam T, Marais BJ. . Epidemiology of tuberculosis in the  
36  
37 Western Pacific Region: Progress toward the 2020 milestone of the End TB Strategy.  
38  
39 *WPSAR* 2020;in press  
40  
41 20. Gilkison C, Chambers S, Blok DJ, et al. Predicting the impact of household contact and mass  
42  
43 chemoprophylaxis on future new leprosy cases in South Tarawa, Kiribati: A modelling study.  
44  
45 *PLoS Negl Trop Dis* 2019;13(9):e0007646. doi: 10.1371/journal.pntd.0007646 [published  
46  
47 Online First: 2019/09/21]  
48  
49 21. Bank TW. Data Catalog: GDP per capita In: Bank TW, ed. Data Catalog.  
50  
51 datacatalog.worldbank.org, 2019.  
52  
53 22. Bank TW. Incidence of tuberculosis (per 100,000 people). World Health Organization, Global  
54  
55 Tuberculosis Report 2020.  
56  
57 [https://data.worldbank.org/indicator/SH.TBS.INCD?most\\_recent\\_value\\_desc=true](https://data.worldbank.org/indicator/SH.TBS.INCD?most_recent_value_desc=true): The World  
58  
59 Bank, 2021.  
60

- 1  
2  
3 23. Organisation WH. Leprosy - New cases detection rate per 100 000 population. The Global Health  
4 Observatory. [https://www.who.int/data/gho/data/indicators/indicator-details/GHO/leprosy---](https://www.who.int/data/gho/data/indicators/indicator-details/GHO/leprosy---new-cases-detection-rate-per-100-000-population)  
5 [new-cases-detection-rate-per-100-000-population](https://www.who.int/data/gho/data/indicators/indicator-details/GHO/leprosy---new-cases-detection-rate-per-100-000-population): World Health Data Platform, 2020.  
6  
7  
8  
9 24. Saeedi P, Petersohn I, Salpea P, et al. Global and regional diabetes prevalence estimates for  
10 2019 and projections for 2030 and 2045: Results from the International Diabetes Federation  
11 Diabetes Atlas. *Diabetes research and clinical practice* 2019;157:107843.  
12  
13  
14 25. Hoy D, Kienene T, Reiher B, et al. Battling tuberculosis in an island context with a high burden of  
15 communicable and non-communicable diseases: epidemiology, progress, and lessons  
16 learned in Kiribati, 2000 to 2012. *Int J Infect Dis* 2015;30:135-41. doi:  
17 10.1016/j.ijid.2014.11.025 [published Online First: 2014/12/03]  
18  
19  
20 26. WHO. WHO Rapid Communication: Molecular assays as initial tests for the diagnosis of  
21 tuberculosis and rifampicin resistance. In: Organisation WH, ed.  
22 <https://www.who.int/tb/publications/2020/rapid-communications-molecular-assays/en/>.  
23  
24  
25  
26  
27 27. Organisation WH. WHO consolidated guidelines on tuberculosis Module 2: Screening –  
28 Systematic screening for tuberculosis diseases. *Global Tuberculosis Programme* 2021  
29  
30  
31 28. Madhani F, Maniar RA, Burfat A, et al. Automated chest radiography and mass systematic  
32 screening for tuberculosis. *Int J Tuberc Lung Dis* 2020;24(7):665-73. doi:  
33 10.5588/ijtld.19.0501 [published Online First: 2020/07/29]  
34  
35  
36 29. Patel MK, Wannemuehler K, Tairi R, et al. Progress towards achieving hepatitis B control in the  
37 Cook Islands, Niue, Tokelau, and Kiribati. *Vaccine* 2016;34(36):4298-303. doi:  
38 10.1016/j.vaccine.2016.06.083 [published Online First: 2016/07/13]  
39  
40  
41 30. Jackson K, Tekoaau R, Holgate T, et al. Hepatitis B and D in the Pacific Islands of Kiribati. *J Clin*  
42 *Viro* 2020;129:104527. doi: 10.1016/j.jcv.2020.104527 [published Online First: 2020/07/10]  
43  
44  
45 31. Fox GJ, Oxlade O, Menzies D. Fluoroquinolone Therapy for the Prevention of Multidrug-Resistant  
46 Tuberculosis in Contacts. A Cost-Effectiveness Analysis. *Am J Respir Crit Care Med*  
47 2015;192(2):229-37. doi: 10.1164/rccm.201501-0069OC [published Online First: 2015/04/29]  
48  
49  
50 32. WHO. WHO consolidated guidelines on tuberculosis: tuberculosis preventive treatment: module 1:  
51 prevention: tuberculosis preventive treatment. 2020  
52  
53  
54  
55  
56  
57  
58  
59  
60



- 1  
2  
3 33. Walker RE, Bass S, Srinivas P, et al. Evaluation of 3 Months of Once-Weekly Rifapentine and  
4 Isoniazid for Latent Tuberculosis Infection. *Ann Pharmacother* 2020;54(5):457-63. doi:  
5 10.1177/1060028019888855 [published Online First: 2019/11/16]  
6  
7  
8  
9 34. Alvarez GG, Van Dyk D, Mallick R, et al. The implementation of rifapentine and isoniazid (3HP) in  
10 two remote Arctic communities with a predominantly Inuit population, the Taima TB 3HP  
11 study. *Int J Circumpolar Health* 2020;79(1):1758501. doi: 10.1080/22423982.2020.1758501  
12 [published Online First: 2020/05/08]  
13  
14  
15  
16 35. Wheeler C, Mohle-Boetani J. Completion Rates, Adverse Effects, and Costs of a 3-Month and 9-  
17 Month Treatment Regimen for Latent Tuberculosis Infection in California Inmates, 2011-2014.  
18 *Public Health Rep* 2019;134(1\_suppl):71s-79s. doi: 10.1177/0033354919826557 [published  
19 Online First: 2019/05/07]  
20  
21  
22  
23  
24 36. Hamada Y, Ford N, Schenkel K, et al. Three-month weekly rifapentine plus isoniazid for  
25 tuberculosis preventive treatment: a systematic review. *Int J Tuberc Lung Dis*  
26 2018;22(12):1422-28. doi: 10.5588/ijtld.18.0168 [published Online First: 2019/01/05]  
27  
28  
29  
30 37. Pease C, Hutton B, Yazdi F, et al. A systematic review of adverse events of rifapentine and  
31 isoniazid compared to other treatments for latent tuberculosis infection. *Pharmacoepidemiol*  
32 *Drug Saf* 2018;27(6):557-66. doi: 10.1002/pds.4423 [published Online First: 2018/03/25]  
33  
34  
35  
36 38. Sterling TR, Villarino ME, Borisov AS, et al. Three months of rifapentine and isoniazid for latent  
37 tuberculosis infection. *N Engl J Med* 2011;365(23):2155-66. doi: 10.1056/NEJMoa1104875  
38 [published Online First: 2011/12/14]  
39  
40  
41  
42 39. Harris PA, Taylor R, Thielke R, et al. Research electronic data capture (REDCap)—a metadata-  
43 driven methodology and workflow process for providing translational research informatics  
44 support. *Journal of biomedical informatics* 2009;42(2):377-81.  
45  
46  
47  
48 40. Health N, Council MR. Guidance: safety monitoring and reporting in clinical trials involving  
49 therapeutic goods. 2016  
50  
51 41. NHMRC. Guidance: Safety monitoring and reporting in clinical trials involving therapeutic goods.  
52 In: Australian Department of Health TGA, ed. [https://www.nhmrc.gov.au/about-](https://www.nhmrc.gov.au/about-us/publications/safety-monitoring-and-reporting-clinical-trials-involving-therapeutic-goods)  
53 [us/publications/safety-monitoring-and-reporting-clinical-trials-involving-therapeutic-goods:](https://www.nhmrc.gov.au/about-us/publications/safety-monitoring-and-reporting-clinical-trials-involving-therapeutic-goods)  
54  
55  
56  
57  
58  
59  
60

- 1  
2  
3 42. WHO. Guidelines for the diagnosis, treatment and prevention of leprosy.  
4  
5 <https://apps.who.int/iris/handle/10665/274127>, 2018.  
6  
7 43. Richardus JH, Tiwari A, Barth-Jaeggi T, et al. Leprosy post-exposure prophylaxis with single-dose  
8 rifampicin (LPEP): an international feasibility programme. *Lancet Glob Health* 2021;9(1):e81-  
9 e90. doi: 10.1016/s2214-109x(20)30396-x [published Online First: 2020/11/02]  
10  
11 44. Schoenmakers A, Mieras L, Budiawan T, et al. The State of Affairs in Post-Exposure Leprosy  
12 Prevention: A Descriptive Meta-Analysis on Immuno- and Chemo-Prophylaxis. *Res Rep Trop*  
13 *Med* 2020;11:97-117. doi: 10.2147/rrtm.S190300 [published Online First: 2020/10/30]  
14  
15 45. Tiwari A, Dandel S, Djupuri R, et al. Population-wide administration of single dose rifampicin for  
16 leprosy prevention in isolated communities: a three year follow-up feasibility study in  
17 Indonesia. *BMC Infect Dis* 2018;18(1):324. doi: 10.1186/s12879-018-3233-3 [published  
18 Online First: 2018/07/13]  
19  
20 46. Alsdurf H, Hill PC, Matteelli A, et al. The cascade of care in diagnosis and treatment of latent  
21 tuberculosis infection: a systematic review and meta-analysis. *Lancet Infect Dis*  
22 2016;16(11):1269-78. doi: 10.1016/s1473-3099(16)30216-x [published Online First:  
23 2016/10/30]  
24  
25 47. Shanaube K, Sismanidis C, Ayles H, et al. Annual risk of tuberculous infection using different  
26 methods in communities with a high prevalence of TB and HIV in Zambia and South Africa.  
27 *PLoS One* 2009;4(11):e7749. doi: 10.1371/journal.pone.0007749 [published Online First:  
28 2009/11/17]  
29  
30 48. Faul F, Erdfelder E, Buchner A, et al. Statistical power analyses using G\* Power 3.1: Tests for  
31 correlation and regression analyses. *Behavior research methods* 2009;41(4):1149-60.  
32  
33 49. WHO. Regional Framework for Action on Implementation of the End TB Strategy in the Western  
34 Pacific. In: Pacific MWROftW, ed. <http://iris.wpro.who.int/handle/10665.1/13131>, 2016.  
35  
36 50. Viney K LC, Morishita F, Rahevar K, Islam T, Oh KH, Marais BJ. A critical evaluation of the  
37 'Regional Framework for Action on Implementation of the End TB Strategy in the Western  
38 Pacific Region, 2016-2020. *WHO Bull* 2020;In press  
39  
40 51. Mohr-Holland E, Douglas-Jones B, Apolisi I, et al. Tuberculosis preventive therapy for children  
41 and adolescents: an emergency response to the COVID-19 pandemic. *Lancet Child Adolesc*  
42  
43  
44  
45  
46  
47  
48  
49  
50  
51  
52  
53  
54  
55  
56  
57  
58  
59  
60

1  
2  
3 *Health* 2021;5(3):159-61. doi: 10.1016/s2352-4642(21)00003-1 [published Online First:  
4  
5 2021/02/21]

- 6  
7 52. Brostrom R, A Lagen, M Konelios-Langinlur, Z Zacharias, S Yadav, E Ko, J Dugan, J Hill, A  
8  
9 Finlay, and J Mermin. OA-14-409-01 Voyage to TB Elimination: A Mass TB Treatment and  
10  
11 Prevention Campaign in the Marshall Islands. 50th World Conference on Lung Health of the  
12  
13 International Union Against Tuberculosis and Lung Disease (The Union). Hyderabad:  
14  
15 International Union Against Tuberculosis and Lung Disease, 2019.

16  
17  
18  
19  
20  
21  
22  
23  
24  
25  
26  
27  
28  
29  
30  
31  
32  
33  
34  
35  
36  
37  
38  
39  
40  
41  
42  
43  
44  
45  
46  
47  
48  
49  
50  
51  
52  
53  
54  
55  
56  
57  
58  
59  
60

For peer review only

**Table 1. Study inclusion and exclusion criteria**

| <b>Inclusion</b>                                                                                                                                                                                                                                              | <b>Exclusion</b>                                                       |
|---------------------------------------------------------------------------------------------------------------------------------------------------------------------------------------------------------------------------------------------------------------|------------------------------------------------------------------------|
| <ul style="list-style-type: none"><li>• Everyone aged <math>\geq 3</math> years</li><li>• Children aged <math>&lt; 3</math> yrs who have had household contact with someone with TB in the past 12 months, or with someone with leprosy since birth</li></ul> | <ul style="list-style-type: none"><li>• Refuse participation</li></ul> |

For peer review only

Table 2. TB preventive treatment (TPT) eligibility and hepatotoxicity risk classification

| Assessment                                                                                                                                                                                                                                            | Hepatotoxicity risk category                                                                                                                                    |                 |                                   |                                                     |
|-------------------------------------------------------------------------------------------------------------------------------------------------------------------------------------------------------------------------------------------------------|-----------------------------------------------------------------------------------------------------------------------------------------------------------------|-----------------|-----------------------------------|-----------------------------------------------------|
|                                                                                                                                                                                                                                                       | Low                                                                                                                                                             | Moderate        | Moderate high                     | High                                                |
| <b>Definition</b>                                                                                                                                                                                                                                     |                                                                                                                                                                 |                 |                                   |                                                     |
| <b>Risk factors</b><br><ul style="list-style-type: none"> <li>• Known viral hepatitis</li> <li>• Known HIV infection</li> <li>• Chronic liver disease</li> <li>• Alcohol/kava use*</li> <li>• Age ≥60 years</li> <li>• Test HBV positive**</li> </ul> | No risk factors present                                                                                                                                         | Any risk factor | Any risk factor                   | Any risk factor                                     |
| <b>ALT baseline test result</b><br>(if any risk factors)                                                                                                                                                                                              | Not done                                                                                                                                                        | ALT <2x ULN     | ALT 2-3x ULN and bilirubin <2xULN | ALT ≥3x ULN (or ALT 2-3x ULN and bilirubin ≥2x ULN) |
| <b>Management</b>                                                                                                                                                                                                                                     |                                                                                                                                                                 |                 |                                   |                                                     |
| <b>Monitoring while on TPT##</b>                                                                                                                                                                                                                      | No repeat ALT                                                                                                                                                   | No repeat ALT   | Repeat ALT after 3-4 weeks        | Not applicable                                      |
| <b>Eligibility for TPT</b>                                                                                                                                                                                                                            | <b>YES</b>                                                                                                                                                      | <b>YES</b>      | <b>YES</b>                        | <b>NO</b>                                           |
| <b>Other reasons for TPT ineligibility</b>                                                                                                                                                                                                            | <ul style="list-style-type: none"> <li>• Diagnosed with TB disease</li> <li>• TPT refused</li> <li>• Pregnancy</li> <li>• Allergies to TPT medicines</li> </ul> |                 |                                   |                                                     |

ALT - alanine aminotransferase; HBV - hepatitis B virus; HIV - human immunodeficiency virus; TB – tuberculosis; TPT - TB preventive treatment; ULN - upper limit of normal

\*'Excessive use' defined as ≥3 days/week and/or (for alcohol) getting drunk every week

\*\*Everyone ≥40 years with a positive TST who agrees to TPT and is otherwise at low risk is tested with an HBV rapid antigen test

## Everyone on TPT receives adherence and adverse event counselling, a TPT passport (Figure S3), as well as access to community-based treatment monitoring and adherence support

**Table 3: Criteria for TPT completion**

| <b><u>Regimen</u></b> | <b>Expected duration</b> | <b>Expected total doses</b> | <b>Minimum doses for completion</b> | <b>Maximum time for completion</b> | <b>TPT incomplete</b>    |
|-----------------------|--------------------------|-----------------------------|-------------------------------------|------------------------------------|--------------------------|
| <b>3HP</b> (weekly)   | 12 weeks                 | 12                          | 11                                  | 16 weeks                           | <8 doses after 12 weeks  |
| <b>3RH</b> (daily)    | 3 months                 | 84                          | 68                                  | 4 months                           | <40 doses after 3 months |
| <b>4R</b> (daily)     | 4 months                 | 120                         | 96                                  | 5 months                           | <68 doses after 4 months |

H - isoniazid; P - rifapentine; R - rifampicin; TB - tuberculosis; TPT - TB preventive treatment

1  
2  
3 **Figure 1. Overview of study enrolment and population-wide TB and leprosy screening**  
4 **approach**  
5  
6  
7  
8  
9

10 HH - household; LTBI - latent TB infection; LPT - leprosy preventive therapy; NTP - Kiribati National TB  
11 Control Programme; TB - tuberculosis; TST - tuberculin skin test; TPT - TB preventive treatment; yrs -  
12 years; 3HP - 12 once-weekly doses of isoniazid and rifapentine; 3RH - 3 months of daily isoniazid and  
13 rifampicin.

14 \*Chest X-ray to be performed in everyone  $\geq 10$  yrs of age and all children  $< 10$  yrs with current symptoms  
(cough, fever, weight loss/failure to thrive or visible neck nodes).

15 \*\*The TST can be read up to 96 hours (4 days) after placement if the 2-day follow-up is missed.  
16  
17  
18  
19  
20  
21  
22  
23  
24  
25  
26  
27  
28  
29  
30  
31  
32  
33  
34  
35  
36  
37  
38  
39  
40  
41  
42  
43  
44  
45  
46  
47  
48  
49  
50  
51  
52  
53  
54  
55  
56  
57  
58  
59  
60

For peer review only

1  
2  
3 **Figure 2. Overview of study governance**  
4  
5  
6  
7

8 PEARL - Pathway to the Elimination of Antibiotic Resistant and Latent tuberculosis in the Pacific; NTP  
9 - National TB program; NLP - Leprosy program in the NTP; MHMS - Ministry of Health and Medical  
10 Services  
11  
12  
13  
14  
15  
16  
17  
18  
19  
20  
21  
22  
23  
24  
25  
26  
27  
28  
29  
30  
31  
32  
33  
34  
35  
36  
37  
38  
39  
40  
41  
42  
43  
44  
45  
46  
47  
48  
49  
50  
51  
52  
53  
54  
55  
56  
57  
58  
59  
60

For peer review only



1  
2  
3  
4  
5  
6  
7  
8  
9  
10  
11  
12  
13  
14  
15  
16  
17  
18  
19  
20  
21  
22  
23  
24  
25  
26  
27  
28  
29  
30  
31  
32  
33  
34  
35  
36  
37  
38  
39  
40  
41  
42  
43  
44  
45  
46  
47  
48  
49  
50  
51  
52  
53  
54  
55  
56  
57  
58  
59  
60

For peer review only

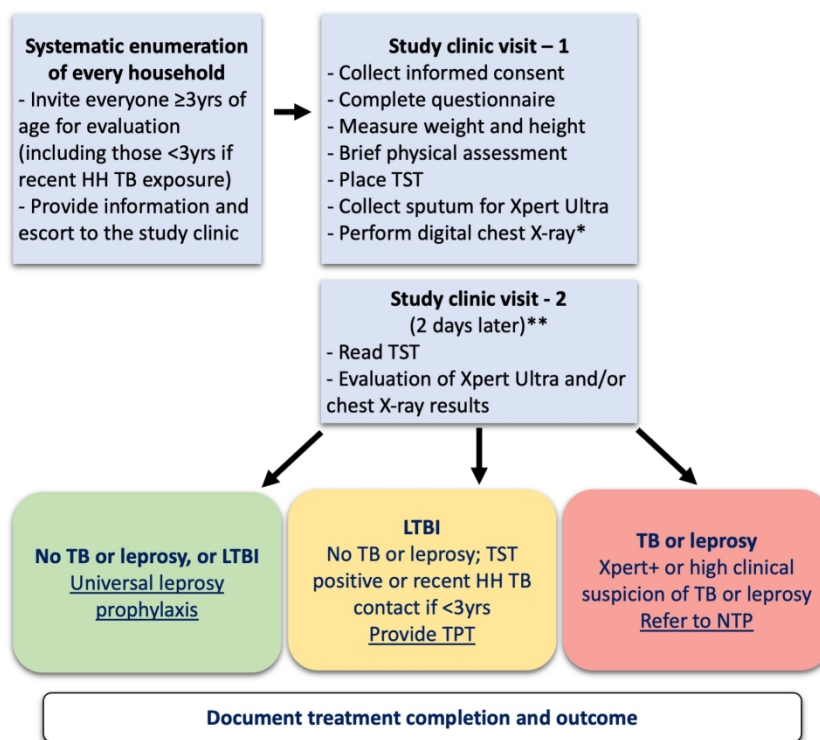

Figure 1. Overview of study enrolment and population-wide TB and leprosy screening approach

HH - household; LTBI - latent TB infection; LPT - leprosy preventive therapy; NTP - Kiribati National TB Control Programme; TB - tuberculosis; TST - tuberculin skin test; TPT - TB preventive treatment; yrs - years; 3HP - 12 once-weekly doses of isoniazid and rifampentine; 3RH - 3 months of daily isoniazid and rifampicin.

\*Chest X-ray to be performed in everyone  $\geq 10$  yrs of age and all children  $< 10$  yrs with current symptoms (cough, fever, weight loss/failure to thrive or visible neck nodes).

\*\*The TST can be read up to 96 hours (4 days) after placement if the 2-day follow-up is missed.

190x190mm (300 x 300 DPI)

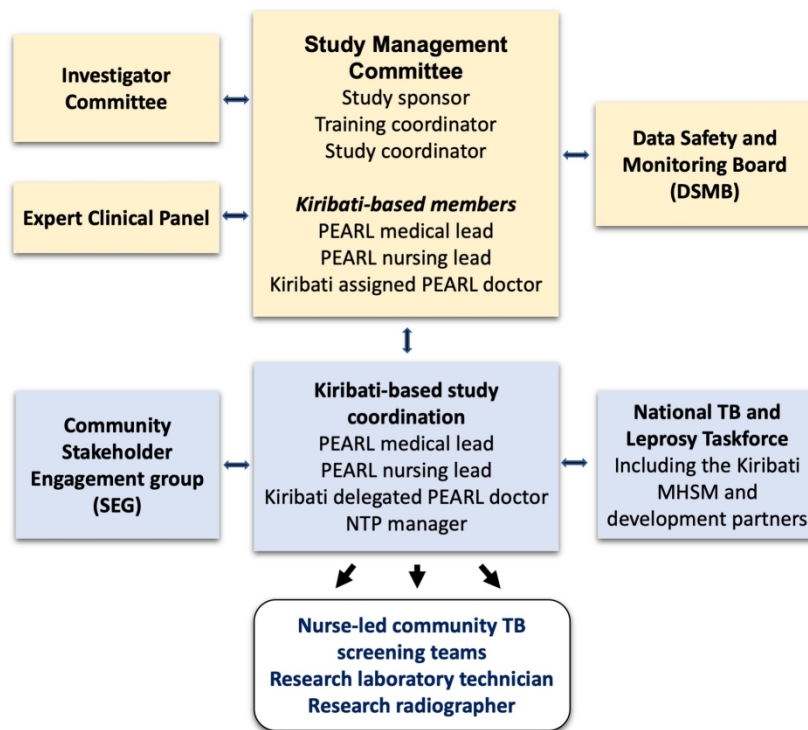

Figure 2. Overview of study governance

PEARL - Pathway to the Elimination of Antibiotic Resistant and Latent tuberculosis in the Pacific; NTP - National TB program; NLP - Leprosy program in the NTP; MHMS - Ministry of Health and Medical Services

190x190mm (300 x 300 DPI)

Supplementary Material

Figure S1. PEARL TB and leprosy screening algorithm

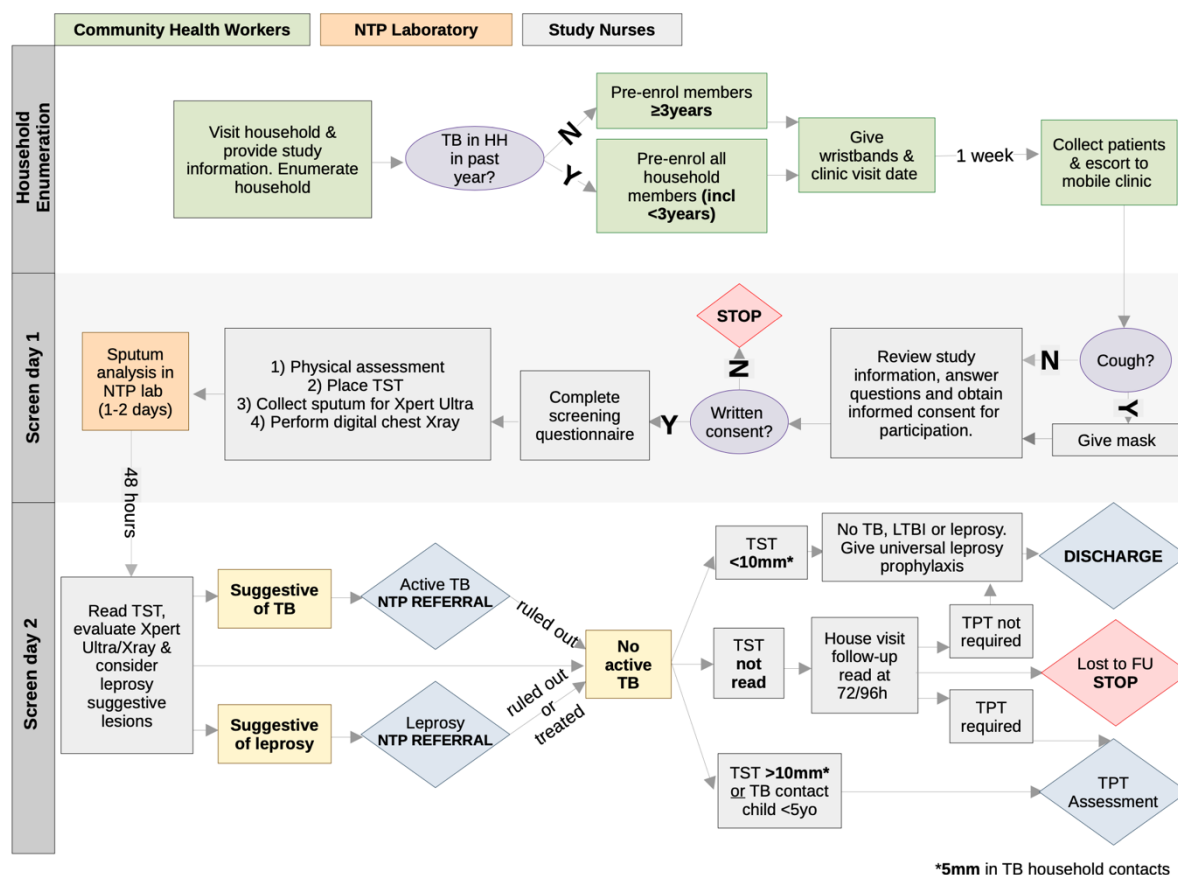

FU – follow-up; HH - household; LTBI - latent TB infection; N - no; NTP - National TB Program; TB - tuberculosis; TPT - TB Preventive Treatment; TST - Tuberculin Skin Test; Y - yes

Figure S2. TB preventive Therapy (TPT) algorithm

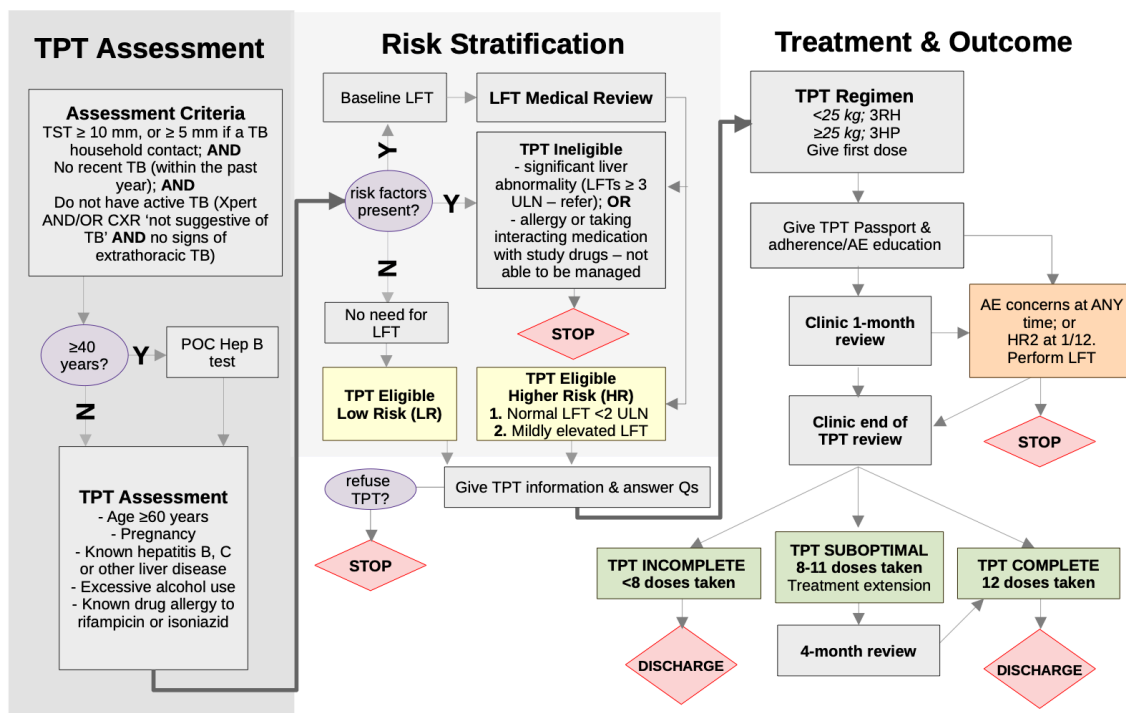

3HP - 3-months weekly rifapentine and isoniazid; 3RH - 3-months daily rifampicin and isoniazid; AE - adverse event; CXR - chest X-ray; FU - follow-up; HR2 - higher risk group 2; LFT - liver function test; LTBI - latent TB infection; NTP - National TB Program; POC - point-of-care; TB - Tuberculosis; TPT - TB Preventive Treatment; TST - Tuberculin Skin Test; ULN - upper limit of normal

Figure S3. TPT patient passport

## 3HP

National TB Program &

# TPT Passport



**We are working together to fight the spread of TB and leprosy in Kiribati**

## Treatment Diary

QR code

Name: \_\_\_\_\_ SID: \_\_\_\_\_

| Week 1                   |                          |                          |                          |                          |                          |                          | Week 9                   |                          |                          |                          |                          |                          |                          |
|--------------------------|--------------------------|--------------------------|--------------------------|--------------------------|--------------------------|--------------------------|--------------------------|--------------------------|--------------------------|--------------------------|--------------------------|--------------------------|--------------------------|
| Sunday                   | Monday                   | Tuesday                  | Wednesday                | Thursday                 | Friday                   | Saturday                 | Sunday                   | Monday                   | Tuesday                  | Wednesday                | Thursday                 | Friday                   | Saturday                 |
| <input type="checkbox"/> |
| <input type="checkbox"/> |
| <input type="checkbox"/> |
| <input type="checkbox"/> |
| <input type="checkbox"/> |
| <input type="checkbox"/> |
| <input type="checkbox"/> |
| <input type="checkbox"/> |
| <input type="checkbox"/> |
| <input type="checkbox"/> |

1-month check-in ↓ 3-month check-in

Treatment Completion

## Taking my medicine

### What is sleeping TB?

Many people infected with the germ that causes TB do not become ill and do not know that they are infected. This is called Latent or Sleeping TB.

### Why do I need treatment?

Sometimes sleeping TB can 'wake up' and slowly become infectious TB. People need to take medication to treat sleeping TB and prevent TB from spreading.

### Missed dose?

**1-2 days missed:** take when you remember, then continue the next week on your regular day  
**3+ days missed:** skip a week and start again on your regular day  
**Not sure?** contact your treatment nurse

## Reminders

- 1** Take your tablets **once a week** for 12 weeks **Don't miss any!**
- 2** Take your tablets on the **same day** every week
- 3** Record **every time** you take your tablets in your **Treatment Passport**
- 4** **Don't drink alcohol** when you take your tablets
- 5** **Store your tablets at room temperature** and out of reach from children



## Things to look out for

**Treatment for sleeping TB is safe to take!**

It is **normal** to have bright orange urine after taking the medications. **Do not stop taking your tablets!**

**Tell a Nurse or Doctor if you have:**

- ongoing fatigue/tiredness/sleepiness
- ongoing nausea/vomiting/loss of appetite or abdominal pain
- new rash or itchy skin
- yellowing skin or eyes
- tingling or numbness in fingers/toes

**Call or visit the treatment clinic on the day the symptoms occur**

**Call +6467777777**

Treatment Clinic open 9-4pm weekdays




Figure S4. Study Participant Information Form



**PEARL PARTICIPANT INFORMATION**  
**Finding and preventing TB and leprosy cases in Tarawa**

**Dear participant,**

We would like to invite you (and your child if relevant) to be treated for latent or sleeping TB. This document provides information about the study, but we will also explain the study to you in person. You will have the opportunity to ask questions if there is anything that you do not understand or if you want more information. You may refuse participation and this will not be held against you or affect any future access to healthcare.

**What is this study about?**

TB is a disease caused by germs that are coughed into the air by someone who is ill with TB. Most people who are infected with the TB germ do not become ill and do not even know that they are infected, this is referred to as latent or 'sleeping' TB. **Sometimes sleeping TB can wake up and make you ill, which may spread the germ to others.** This research aims to treat all people with TB, those who are ill and those with sleeping TB, so that we can try to eliminate TB from Tarawa. At the same time we are also trying to eliminate leprosy from Tarawa.

This Participant Information Form tells you about the study so that you can know what it involves. Please read this sheet carefully and ask questions about anything that you don't understand or want to know more about.

**Who is conducting the study?**

The study is carried out by researchers at the University of Sydney, Australia, in close collaboration with the Kiribati National TB and Leprosy Programme (NTP). The study is funded by the Australian Medical Research Future Fund and fully supported by the Kiribati Ministry of Health.

**What will happen?**

This study involves screening for TB (both 'sleeping TB' and illness caused by TB) and leprosy. Screening will include providing a sputum sample, having a chest X-ray taken and you may be asked to remove your shirt in a private area to have a skin assessment by a nurse or doctor. People who are ill with TB or leprosy will be referred to the TB and Leprosy Programme for appropriate treatment. People with 'sleeping TB' will be offered TB preventive treatment (TPT) and those without any illness or TB infection will be offered leprosy preventive prophylaxis.

To check if someone is able to be given medication for sleeping TB, a study nurse will ask some personal questions. This may include questions about previous and current illnesses, medications used, drinking of alcohol or kava, and questions about pregnancy if you are a woman. Every person older than 40 years will be given a rapid test to see if they have hepatitis B infection, which is important for us to know before considering treatment for 'sleeping TB'. This test involves a finger prick to get a small drop of blood. People with risk factors will need to have a small amount of blood drawn to make sure their liver function stays healthy during the time that they are treated for sleeping TB.

**How much of my time will the study take?**

We will try to waste as little of your time as possible. To complete the TB and leprosy screening will require you (and your whole household) to be seen on two separate days. This is to complete all the necessary documentation and tests. It is expected that this will take about 2-3 hours of your time on each of these days. These diagnosed with sleeping TB will need to take tablets once a

1

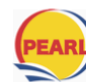

week for 12 weeks. Tablets will be given out at the mobile health clinic on a monthly basis and can be collected between 9am and 4pm on weekdays.

#### **Who can take part in the study?**

Every person older than 3 years of age living in Tarawa and Betio islet is invited to take part. People younger than 3 years of age who live in a house that shares a kitchen with someone who has had TB or leprosy in the past 12 months are also invited to take part.

#### **Do I have to be in the study? Can I withdraw from the study once I've started?**

Taking part in this study is strongly recommended by the Kiribati Ministry of Health and Medical Services (MHMS) to get rid of TB and leprosy across Tarawa. However, participation is completely voluntary and you do not have to take part. Your decision will not affect your current or future relationship with the researchers, the Kiribati National TB and leprosy Program or the Ministry of Health.

If you decide to take part in the study and then change your mind later, you are free to withdraw at any time. You can do this by visiting the study clinic and speaking with a study nurse who will give you exit information and advice on how to stay healthy from TB in the future.

If you decide to withdraw from the study, we will not collect any further information from you. Information that we have already collected will be kept in our study records and may be included in the study results.

#### **Are there any costs or risks associated with being in the study?**

There are no costs associated with study participation. Mobile study clinics will be conveniently situated to be easily accessible and all study tests or treatment will be funded by the study.

If treatment for 'sleeping TB' is provided it is normal to feel a bit tired and to have bright orange urine while you are taking the tablets. Rarely people may develop some of the symptoms below, in which case it is important to inform us immediately. Rare symptoms to look out for include:

- ongoing nausea, vomiting or loss of appetite
- new rash or itchy skin
- yellowing skin or eyes
- tingling or numbness in fingers or toes
- any other symptoms of concern to you

Study nurses and doctors are available Monday to Friday, 9am to 4pm to see anyone who is feeling sick and thinks this may be due to their treatment. You may also call the 24-hour treatment hotline using the number on the back of your treatment card (TPT passport).

#### **Are there any benefits associated with being in the study?**

Yes, there are major benefits to yourself and the wider community of Tarawa, including Betio islet

- You (and your child) will get treatment for TB or leprosy if required
- You (and your child) will get treatment for sleeping TB (TPT) or to keep leprosy away
- You will help to eliminate TB and leprosy from Tarawa
- Study results will help other Pacific Island nations to eliminate TB and leprosy in the future

#### **What will happen to information about me that is collected during the study?**

My information will be kept in my private medical records with the National TB Program. My data collected during the screen will be separated from my name so that the screening results cannot





be identified as my data. This information will be used to guide the Ministry of Health and Medical Services and the PEARL team about TB and leprosy transmission and occurrence in Tarawa. This information may be reported in international publications, but my name and personal information will never be shared.

**What if I would like further information about the study?**

Further information about the study can be found on our website [www.pearlpacific.com](http://www.pearlpacific.com)\*

**Will I be told the results of the study?**

The results of the study will be reported to the residents of Tarawa by radio announcement and will also be accessible on the website [www.pearlpacific.com](http://www.pearlpacific.com).\*

**What if I have a complaint or any concerns about the study?**

This research has been reviewed by an independent group of people called a Human Research Ethics Committee (HREC) at the University of Sydney and the Kiribati Ministry of Health and Medical Services.

If you are concerned about the way this study is being conducted please inform the study team; we want to learn and hear how we can improve things. If you wish to make a complaint to someone independent then please contact any of the people listed below.

Terotia Tabwaka Kelese, Human Resource Officer, Republic of Kiribati  
**Email:** [ttabwaka@gmail.com](mailto:ttabwaka@gmail.com)

or

The Manager, Ethics Administration, University of Sydney:  
**Telephone:** +61 2 8627 8176  
**Email:** [human.ethics@sydney.edu.au](mailto:human.ethics@sydney.edu.au)  
**Fax:** +61 2 8627 8177 (Facsimile)

**Ethical approval**

This research plan (protocol) was approved by the ethics committee of the faculty of medicine and health at the University of Sydney. This helps to ensure that we do everything possible to keep you safe and to respect your rights and privacy at all times.

**WE THANK YOU FOR YOUR TIME AND COOPERATION.**

The PEARL Research Team with the support of the Kiribati National TB and Leprosy Control Programmes

**On behalf of the Kiribati Health Secretary**

.....

\*in development

Figure S5. Study Participant Informed Consent Form

### INFORMED CONSENT PROCESS FORM

**Name of Guardian/ Name of Guardian**  
\* must provide value

**Date of informed consent**  
/Date of informed consent  
\* must provide value    D-M-Y

**If not done, please specify the reason** If not done, please specify the reason

**Can participant read Kiribati?** Can participant read Kiribati?  
\* must provide value  
 Yes/ Yes  
 No/ No reset

**Can participant read English?** Can participant read English?  
\* must provide value  
 1. Yes/ Yes  
 0. No/ No reset

**Participant information given and all participant questions answered?** 8. Does study staff discuss with participant about content of the participant information statement and answer all questions from participant?  
\* must provide value  
 1. Yes/ Yes  
 0. No/ No reset

**Participant is aware that screen may involve providing sputum or blood samples?** Participant is aware that screen may involve providing sputum or blood samples?  
\* must provide value  
 1. Yes/ Yes  
 0. No/ No reset

**Does the participant/guardian agree to participate in study?** 9. Does the participant agree to participate in study?  
\* must provide value  
 1. Yes/ Yes  
 0. No/ No reset

**Does the young person assent to participate in the study?** 9. Does the young person assent to participate in the study?  
\* must provide value  
 Yes/ Yes  
 No/ No reset

**Date & Time Participant/relative/witness signed Written Consent Form** 10. Date & Time Participant/relative/witness signed Written Consent Form  
\* must provide value    D-M-Y H:M

**Sign**  
[Add signature](#)

**Witness Sign**  
[Add signature](#)

**Other comments** Other comments

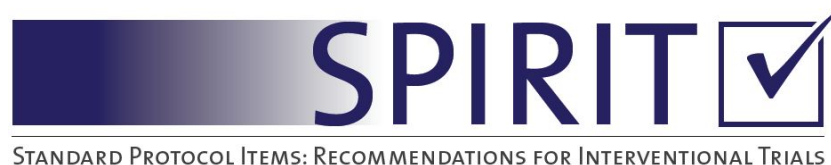

## Population-wide active case finding and prevention for tuberculosis and leprosy elimination in Kiribati – the PEARL study protocol

SPIRIT 2013 Checklist: Recommended items to address in a clinical trial protocol and related documents\*

| Section/item                      | Item No | Description                                                                                                                                                                                                                                                                              | Addressed on page number |
|-----------------------------------|---------|------------------------------------------------------------------------------------------------------------------------------------------------------------------------------------------------------------------------------------------------------------------------------------------|--------------------------|
| <b>Administrative information</b> |         |                                                                                                                                                                                                                                                                                          |                          |
| Title                             | 1       | Descriptive title identifying the study design, population, interventions, and, if applicable, trial acronym                                                                                                                                                                             | ___1___                  |
| Trial registration                | 2a      | Trial identifier and registry name. If not yet registered, name of intended registry                                                                                                                                                                                                     | NA not a trial           |
|                                   | 2b      | All items from the World Health Organization Trial Registration Data Set                                                                                                                                                                                                                 | NA not a trial           |
| Protocol version                  | 3       | Date and version identifier                                                                                                                                                                                                                                                              | ___3___                  |
| Funding                           | 4       | Sources and types of financial, material, and other support                                                                                                                                                                                                                              | ___19___                 |
| Roles and responsibilities        | 5a      | Names, affiliations, and roles of protocol contributors                                                                                                                                                                                                                                  | ___1-2; 19___            |
|                                   | 5b      | Name and contact information for the trial sponsor                                                                                                                                                                                                                                       | ___19___                 |
|                                   | 5c      | Role of study sponsor and funders, if any, in study design; collection, management, analysis, and interpretation of data; writing of the report; and the decision to submit the report for publication, including whether they will have ultimate authority over any of these activities | ___19___                 |
|                                   | 5d      | Composition, roles, and responsibilities of the coordinating centre, steering committee, endpoint adjudication committee, data management team, and other individuals or groups overseeing the trial, if applicable (see Item 21a for data monitoring committee)                         | ___13-15___              |

1 **Introduction**

2

3 Background and rationale 6a Description of research question and justification for undertaking the trial, including summary of relevant studies (published and unpublished) examining benefits and harms for each intervention 5-6

4

5

6 6b Explanation for choice of comparators 5-6

7

8 Objectives 7 Specific objectives or hypotheses 5-6

9

10 Trial design 8 Description of trial design including type of trial (eg, parallel group, crossover, factorial, single group), allocation ratio, and framework (eg, superiority, equivalence, noninferiority, exploratory) 6

11

12

13

14 **Methods: Participants, interventions, and outcomes**

15

16 Study setting 9 Description of study settings (eg, community clinic, academic hospital) and list of countries where data will be collected. Reference to where list of study sites can be obtained 6-7

17

18

19 Eligibility criteria 10 Inclusion and exclusion criteria for participants. If applicable, eligibility criteria for study centres and individuals who will perform the interventions (eg, surgeons, psychotherapists) 7; table 1

20

21

22 Interventions 11a Interventions for each group with sufficient detail to allow replication, including how and when they will be administered 7-12

23

24

25 11b Criteria for discontinuing or modifying allocated interventions for a given trial participant (eg, drug dose change in response to harms, participant request, or improving/worsening disease) 10-11; table 2

26

27

28 11c Strategies to improve adherence to intervention protocols, and any procedures for monitoring adherence (eg, drug tablet return, laboratory tests) 10

29

30

31 11d Relevant concomitant care and interventions that are permitted or prohibited during the trial 10-11

32

33

34 Outcomes 12 Primary, secondary, and other outcomes, including the specific measurement variable (eg, systolic blood pressure), analysis metric (eg, change from baseline, final value, time to event), method of aggregation (eg, median, proportion), and time point for each outcome. Explanation of the clinical relevance of chosen efficacy and harm outcomes is strongly recommended 12-13

35

36

37

38

39

40 Participant timeline 13 Time schedule of enrolment, interventions (including any run-ins and washouts), assessments, and visits for participants. A schematic diagram is highly recommended (see Figure) table 3; fig 1

41

42

43

44

45

46

1 Sample size 14 Estimated number of participants needed to achieve study objectives and how it was determined, including 13  
 2 clinical and statistical assumptions supporting any sample size calculations

4 Recruitment 15 Strategies for achieving adequate participant enrolment to reach target sample size 8; 13

6 **Methods: Assignment of interventions (for controlled trials)**

8 Allocation:

10 Sequence 16a Method of generating the allocation sequence (eg, computer-generated random numbers), and list of any NA non-random  
 11 generation factors for stratification. To reduce predictability of a random sequence, details of any planned restriction  
 12 (eg, blocking) should be provided in a separate document that is unavailable to those who enrol participants  
 13 or assign interventions

16 Allocation 16b Mechanism of implementing the allocation sequence (eg, central telephone; sequentially numbered, NA population-  
 17 concealment opaque, sealed envelopes), describing any steps to conceal the sequence until interventions are assigned wide  
 18 mechanism

20 Implementation 16c Who will generate the allocation sequence, who will enrol participants, and who will assign participants to NA population-  
 21 interventions wide

24 Blinding (masking) 17a Who will be blinded after assignment to interventions (eg, trial participants, care providers, outcome NA open-label  
 25 assessors, data analysts), and how

27 17b If blinded, circumstances under which unblinding is permissible, and procedure for revealing a participant's NA open-label  
 28 allocated intervention during the trial

31 **Methods: Data collection, management, and analysis**

33 Data collection 18a Plans for assessment and collection of outcome, baseline, and other trial data, including any related 12-15  
 34 methods processes to promote data quality (eg, duplicate measurements, training of assessors) and a description of  
 35 study instruments (eg, questionnaires, laboratory tests) along with their reliability and validity, if known.  
 36 Reference to where data collection forms can be found, if not in the protocol

39 18b Plans to promote participant retention and complete follow-up, including list of any outcome data to be 10; 12  
 40 collected for participants who discontinue or deviate from intervention protocols

|    |                                 |     |                                                                                                                                                                                                                                                                                                                                       |                                               |
|----|---------------------------------|-----|---------------------------------------------------------------------------------------------------------------------------------------------------------------------------------------------------------------------------------------------------------------------------------------------------------------------------------------|-----------------------------------------------|
| 1  | Data management                 | 19  | Plans for data entry, coding, security, and storage, including any related processes to promote data quality (eg, double data entry; range checks for data values). Reference to where details of data management procedures can be found, if not in the protocol                                                                     | <a href="#">10</a> ; <a href="#">15</a>       |
| 2  |                                 |     |                                                                                                                                                                                                                                                                                                                                       |                                               |
| 3  |                                 |     |                                                                                                                                                                                                                                                                                                                                       |                                               |
| 4  |                                 |     |                                                                                                                                                                                                                                                                                                                                       |                                               |
| 5  | Statistical methods             | 20a | Statistical methods for analysing primary and secondary outcomes. Reference to where other details of the statistical analysis plan can be found, if not in the protocol                                                                                                                                                              | <a href="#">12-13</a>                         |
| 6  |                                 |     |                                                                                                                                                                                                                                                                                                                                       |                                               |
| 7  |                                 |     |                                                                                                                                                                                                                                                                                                                                       |                                               |
| 8  |                                 | 20b | Methods for any additional analyses (eg, subgroup and adjusted analyses)                                                                                                                                                                                                                                                              | <a href="#">12-13</a>                         |
| 9  |                                 |     |                                                                                                                                                                                                                                                                                                                                       |                                               |
| 10 |                                 | 20c | Definition of analysis population relating to protocol non-adherence (eg, as randomised analysis), and any statistical methods to handle missing data (eg, multiple imputation)                                                                                                                                                       | <a href="#">12-13</a>                         |
| 11 |                                 |     |                                                                                                                                                                                                                                                                                                                                       |                                               |
| 12 |                                 |     |                                                                                                                                                                                                                                                                                                                                       |                                               |
| 13 |                                 |     |                                                                                                                                                                                                                                                                                                                                       |                                               |
| 14 | <b>Methods: Monitoring</b>      |     |                                                                                                                                                                                                                                                                                                                                       |                                               |
| 15 |                                 |     |                                                                                                                                                                                                                                                                                                                                       |                                               |
| 16 | Data monitoring                 | 21a | Composition of data monitoring committee (DMC); summary of its role and reporting structure; statement of whether it is independent from the sponsor and competing interests; and reference to where further details about its charter can be found, if not in the protocol. Alternatively, an explanation of why a DMC is not needed | <a href="#">13</a> ; <a href="#">fig 2</a>    |
| 17 |                                 |     |                                                                                                                                                                                                                                                                                                                                       |                                               |
| 18 |                                 |     |                                                                                                                                                                                                                                                                                                                                       |                                               |
| 19 |                                 |     |                                                                                                                                                                                                                                                                                                                                       |                                               |
| 20 |                                 |     |                                                                                                                                                                                                                                                                                                                                       |                                               |
| 21 |                                 |     |                                                                                                                                                                                                                                                                                                                                       |                                               |
| 22 |                                 | 21b | Description of any interim analyses and stopping guidelines, including who will have access to these interim results and make the final decision to terminate the trial                                                                                                                                                               | <a href="#">13</a> ; <a href="#">15</a>       |
| 23 |                                 |     |                                                                                                                                                                                                                                                                                                                                       |                                               |
| 24 |                                 |     |                                                                                                                                                                                                                                                                                                                                       |                                               |
| 25 | Harms                           | 22  | Plans for collecting, assessing, reporting, and managing solicited and spontaneously reported adverse events and other unintended effects of trial interventions or trial conduct                                                                                                                                                     | <a href="#">10-11</a> ; <a href="#">13</a>    |
| 26 |                                 |     |                                                                                                                                                                                                                                                                                                                                       |                                               |
| 27 |                                 |     |                                                                                                                                                                                                                                                                                                                                       |                                               |
| 28 | Auditing                        | 23  | Frequency and procedures for auditing trial conduct, if any, and whether the process will be independent from investigators and the sponsor                                                                                                                                                                                           | <a href="#">13-15</a> ; <a href="#">fig 2</a> |
| 29 |                                 |     |                                                                                                                                                                                                                                                                                                                                       |                                               |
| 30 |                                 |     |                                                                                                                                                                                                                                                                                                                                       |                                               |
| 31 |                                 |     |                                                                                                                                                                                                                                                                                                                                       |                                               |
| 32 | <b>Ethics and dissemination</b> |     |                                                                                                                                                                                                                                                                                                                                       |                                               |
| 33 |                                 |     |                                                                                                                                                                                                                                                                                                                                       |                                               |
| 34 | Research ethics approval        | 24  | Plans for seeking research ethics committee/institutional review board (REC/IRB) approval                                                                                                                                                                                                                                             | <a href="#">3</a> ; <a href="#">14</a>        |
| 35 |                                 |     |                                                                                                                                                                                                                                                                                                                                       |                                               |
| 36 |                                 |     |                                                                                                                                                                                                                                                                                                                                       |                                               |
| 37 | Protocol amendments             | 25  | Plans for communicating important protocol modifications (eg, changes to eligibility criteria, outcomes, analyses) to relevant parties (eg, investigators, REC/IRBs, trial participants, trial registries, journals, regulators)                                                                                                      | <a href="#">3</a> ; <a href="#">14</a>        |
| 38 |                                 |     |                                                                                                                                                                                                                                                                                                                                       |                                               |
| 39 |                                 |     |                                                                                                                                                                                                                                                                                                                                       |                                               |
| 40 |                                 |     |                                                                                                                                                                                                                                                                                                                                       |                                               |
| 41 |                                 |     |                                                                                                                                                                                                                                                                                                                                       |                                               |
| 42 |                                 |     |                                                                                                                                                                                                                                                                                                                                       |                                               |
| 43 |                                 |     |                                                                                                                                                                                                                                                                                                                                       |                                               |
| 44 |                                 |     |                                                                                                                                                                                                                                                                                                                                       |                                               |
| 45 |                                 |     |                                                                                                                                                                                                                                                                                                                                       |                                               |
| 46 |                                 |     |                                                                                                                                                                                                                                                                                                                                       |                                               |

|    |                               |     |                                                                                                                                                                                                                                                                                     |                                                                    |
|----|-------------------------------|-----|-------------------------------------------------------------------------------------------------------------------------------------------------------------------------------------------------------------------------------------------------------------------------------------|--------------------------------------------------------------------|
| 1  | Consent or assent             | 26a | Who will obtain informed consent or assent from potential trial participants or authorised surrogates, and how (see Item 32)                                                                                                                                                        | <u>14</u>                                                          |
| 2  |                               |     |                                                                                                                                                                                                                                                                                     |                                                                    |
| 3  |                               |     |                                                                                                                                                                                                                                                                                     |                                                                    |
| 4  |                               | 26b | Additional consent provisions for collection and use of participant data and biological specimens in ancillary studies, if applicable                                                                                                                                               | <u>11; 14</u>                                                      |
| 5  |                               |     |                                                                                                                                                                                                                                                                                     |                                                                    |
| 6  |                               |     |                                                                                                                                                                                                                                                                                     |                                                                    |
| 7  | Confidentiality               | 27  | How personal information about potential and enrolled participants will be collected, shared, and maintained in order to protect confidentiality before, during, and after the trial                                                                                                | <u>14-15</u>                                                       |
| 8  |                               |     |                                                                                                                                                                                                                                                                                     |                                                                    |
| 9  |                               |     |                                                                                                                                                                                                                                                                                     |                                                                    |
| 10 | Declaration of interests      | 28  | Financial and other competing interests for principal investigators for the overall trial and each study site                                                                                                                                                                       | <u>19</u>                                                          |
| 11 |                               |     |                                                                                                                                                                                                                                                                                     |                                                                    |
| 12 |                               |     |                                                                                                                                                                                                                                                                                     |                                                                    |
| 13 | Access to data                | 29  | Statement of who will have access to the final trial dataset, and disclosure of contractual agreements that limit such access for investigators                                                                                                                                     | <u>14</u>                                                          |
| 14 |                               |     |                                                                                                                                                                                                                                                                                     |                                                                    |
| 15 |                               |     |                                                                                                                                                                                                                                                                                     |                                                                    |
| 16 |                               |     |                                                                                                                                                                                                                                                                                     |                                                                    |
| 17 | Ancillary and post-trial care | 30  | Provisions, if any, for ancillary and post-trial care, and for compensation to those who suffer harm from trial participation                                                                                                                                                       | NA – Public Health intervention endorsed by the Ministry of Health |
| 18 |                               |     |                                                                                                                                                                                                                                                                                     |                                                                    |
| 19 |                               |     |                                                                                                                                                                                                                                                                                     |                                                                    |
| 20 |                               |     |                                                                                                                                                                                                                                                                                     |                                                                    |
| 21 |                               |     |                                                                                                                                                                                                                                                                                     |                                                                    |
| 22 | Dissemination policy          | 31a | Plans for investigators and sponsor to communicate trial results to participants, healthcare professionals, the public, and other relevant groups (eg, via publication, reporting in results databases, or other data sharing arrangements), including any publication restrictions | <u>14</u>                                                          |
| 23 |                               |     |                                                                                                                                                                                                                                                                                     |                                                                    |
| 24 |                               |     |                                                                                                                                                                                                                                                                                     |                                                                    |
| 25 |                               |     |                                                                                                                                                                                                                                                                                     |                                                                    |
| 26 |                               |     |                                                                                                                                                                                                                                                                                     |                                                                    |
| 27 |                               | 31b | Authorship eligibility guidelines and any intended use of professional writers                                                                                                                                                                                                      | <u>19</u>                                                          |
| 28 |                               |     |                                                                                                                                                                                                                                                                                     |                                                                    |
| 29 |                               | 31c | Plans, if any, for granting public access to the full protocol, participant-level dataset, and statistical code                                                                                                                                                                     | NA – shared with the Kiribati Ministry of Health                   |
| 30 |                               |     |                                                                                                                                                                                                                                                                                     |                                                                    |
| 31 |                               |     |                                                                                                                                                                                                                                                                                     |                                                                    |
| 32 |                               |     |                                                                                                                                                                                                                                                                                     |                                                                    |
| 33 |                               |     |                                                                                                                                                                                                                                                                                     |                                                                    |
| 34 | <b>Appendices</b>             |     |                                                                                                                                                                                                                                                                                     |                                                                    |
| 35 |                               |     |                                                                                                                                                                                                                                                                                     |                                                                    |
| 36 | Informed consent materials    | 32  | Model consent form and other related documentation given to participants and authorised surrogates                                                                                                                                                                                  | <u>fig S3; S4; S5</u>                                              |
| 37 |                               |     |                                                                                                                                                                                                                                                                                     |                                                                    |
| 38 |                               |     |                                                                                                                                                                                                                                                                                     |                                                                    |
| 39 |                               |     |                                                                                                                                                                                                                                                                                     |                                                                    |
| 40 |                               |     |                                                                                                                                                                                                                                                                                     |                                                                    |
| 41 |                               |     |                                                                                                                                                                                                                                                                                     |                                                                    |
| 42 |                               |     |                                                                                                                                                                                                                                                                                     |                                                                    |
| 43 |                               |     |                                                                                                                                                                                                                                                                                     |                                                                    |
| 44 |                               |     |                                                                                                                                                                                                                                                                                     |                                                                    |
| 45 |                               |     |                                                                                                                                                                                                                                                                                     |                                                                    |
| 46 |                               |     |                                                                                                                                                                                                                                                                                     |                                                                    |

1 Biological specimens 33 Plans for collection, laboratory evaluation, and storage of biological specimens for genetic or molecular  
2 analysis in the current trial and for future use in ancillary studies, if applicable  
3  
4  
5  
6

NA – subject to  
separate  
ethics/studies will  
be reported  
separately

---

7  
8 \*It is strongly recommended that this checklist be read in conjunction with the SPIRIT 2013 Explanation & Elaboration for important clarification on the items.  
9 Amendments to the protocol should be tracked and dated. The SPIRIT checklist is copyrighted by the SPIRIT Group under the Creative Commons  
10 [“Attribution-NonCommercial-NoDerivs 3.0 Unported”](#) license.  
11  
12  
13  
14  
15  
16  
17  
18  
19  
20  
21  
22  
23  
24  
25  
26  
27  
28  
29  
30  
31  
32  
33  
34  
35  
36  
37  
38  
39  
40  
41  
42  
43  
44  
45  
46

For peer review only



# BMJ Open

## Population-wide active case finding and prevention for tuberculosis and leprosy elimination in Kiribati – the PEARL study protocol

|                                 |                                                                                                                                                                                                                                                                                                                                                                                                                                                                                                                                                                                                                                                                                                                                                                                                                                                                                                                                                                                                                                                                                                                                                                                                                                                                                                                                                                                                                                                                                                                                                                                                                                                      |
|---------------------------------|------------------------------------------------------------------------------------------------------------------------------------------------------------------------------------------------------------------------------------------------------------------------------------------------------------------------------------------------------------------------------------------------------------------------------------------------------------------------------------------------------------------------------------------------------------------------------------------------------------------------------------------------------------------------------------------------------------------------------------------------------------------------------------------------------------------------------------------------------------------------------------------------------------------------------------------------------------------------------------------------------------------------------------------------------------------------------------------------------------------------------------------------------------------------------------------------------------------------------------------------------------------------------------------------------------------------------------------------------------------------------------------------------------------------------------------------------------------------------------------------------------------------------------------------------------------------------------------------------------------------------------------------------|
| Journal:                        | <i>BMJ Open</i>                                                                                                                                                                                                                                                                                                                                                                                                                                                                                                                                                                                                                                                                                                                                                                                                                                                                                                                                                                                                                                                                                                                                                                                                                                                                                                                                                                                                                                                                                                                                                                                                                                      |
| Manuscript ID                   | bmjopen-2021-055295.R1                                                                                                                                                                                                                                                                                                                                                                                                                                                                                                                                                                                                                                                                                                                                                                                                                                                                                                                                                                                                                                                                                                                                                                                                                                                                                                                                                                                                                                                                                                                                                                                                                               |
| Article Type:                   | Protocol                                                                                                                                                                                                                                                                                                                                                                                                                                                                                                                                                                                                                                                                                                                                                                                                                                                                                                                                                                                                                                                                                                                                                                                                                                                                                                                                                                                                                                                                                                                                                                                                                                             |
| Date Submitted by the Author:   | 14-Dec-2021                                                                                                                                                                                                                                                                                                                                                                                                                                                                                                                                                                                                                                                                                                                                                                                                                                                                                                                                                                                                                                                                                                                                                                                                                                                                                                                                                                                                                                                                                                                                                                                                                                          |
| Complete List of Authors:       | <p>Coleman, Mikaela; The University of Sydney, Faculty of Medicine and Health; Centenary Institute Medical Research Foundation, Tuberculosis Research Program</p> <p>Hill, Jeremy; The University of Sydney, Faculty of Medicine and Health; Centenary Institute Medical Research Foundation, Tuberculosis Research Program</p> <p>Timeon, Eretii; Government of the Republic of Kiribati Ministry of Health and Medical Services</p> <p>Tonganibeia, Alfred; Government of the Republic of Kiribati Ministry of Health and Medical Services</p> <p>Eromanga, Baraniko; Government of the Republic of Kiribati Ministry of Health and Medical Services</p> <p>Islam, Tauhid; World Health Organization Regional Office for the Western Pacific, Division of Programmes for Disease Control</p> <p>Trauer, James; Monash University, School of Public Health and Preventive Medicine</p> <p>Chambers, Stephen; The Pacific Leprosy Foundation; University of Otago Christchurch, Department of Pathology and Biomedical Science,</p> <p>Christensen, Amanda; Australian Respiratory Council</p> <p>Fox, Gregory; The University of Sydney, Faculty of Medicine and Health</p> <p>Marks, Guy; Woolcock Institute of Medical Research; University of New South Wales, South Western Sydney Clinical School</p> <p>Britton, Warwick; Royal Prince Alfred Hospital, Department of Clinical Immunology; Centenary Institute Medical Research Foundation, The University of Sydney</p> <p>Marais, B; The University of Sydney, Marie Bashir Institute for Infectious Diseases and Biosecurity; The University of Sydney, Faculty of Medicine and Health</p> |
| <b>Primary Subject Heading</b>: | Epidemiology                                                                                                                                                                                                                                                                                                                                                                                                                                                                                                                                                                                                                                                                                                                                                                                                                                                                                                                                                                                                                                                                                                                                                                                                                                                                                                                                                                                                                                                                                                                                                                                                                                         |
| Secondary Subject Heading:      | Epidemiology, Global health, Infectious diseases, Public health                                                                                                                                                                                                                                                                                                                                                                                                                                                                                                                                                                                                                                                                                                                                                                                                                                                                                                                                                                                                                                                                                                                                                                                                                                                                                                                                                                                                                                                                                                                                                                                      |
| Keywords:                       | Tuberculosis < INFECTIOUS DISEASES, EPIDEMIOLOGY, Epidemiology < INFECTIOUS DISEASES, Public health < INFECTIOUS DISEASES, Infection control < INFECTIOUS DISEASES, PREVENTIVE MEDICINE                                                                                                                                                                                                                                                                                                                                                                                                                                                                                                                                                                                                                                                                                                                                                                                                                                                                                                                                                                                                                                                                                                                                                                                                                                                                                                                                                                                                                                                              |
|                                 |                                                                                                                                                                                                                                                                                                                                                                                                                                                                                                                                                                                                                                                                                                                                                                                                                                                                                                                                                                                                                                                                                                                                                                                                                                                                                                                                                                                                                                                                                                                                                                                                                                                      |

1  
2  
3  
4  
5  
6  
7  
8  
9  
10  
11  
12  
13  
14  
15  
16  
17  
18  
19  
20  
21  
22  
23  
24  
25  
26  
27  
28  
29  
30  
31  
32  
33  
34  
35  
36  
37  
38  
39  
40  
41  
42  
43  
44  
45  
46  
47  
48  
49  
50  
51  
52  
53  
54  
55  
56  
57  
58  
59  
60

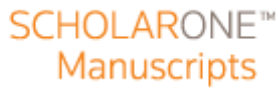

**TITLE**

Population-wide active case finding and prevention for tuberculosis and leprosy elimination in Kiribati  
– the PEARL study protocol

**AUTHORS**

Mikaela Coleman,<sup>1,2</sup> Jeremy Hill,<sup>1,2</sup> Eretii Timeon,<sup>3</sup> Alfred Tonganibeia,<sup>3</sup> Baraniko Eromanga,<sup>3</sup> Tauhid  
Islam,<sup>4</sup> James M Trauer,<sup>5</sup> Stephen T Chambers,<sup>6,7</sup> Amanda Christensen,<sup>8</sup> Greg J Fox,<sup>1,9</sup> Guy B  
Marks,<sup>9,10</sup> Warwick J Britton,<sup>1,2,11</sup> and Ben J Marais<sup>1,12</sup>

**CORRESPONDING AUTHOR**

Dr Mikaela Coleman

Room 5.17, The Centenary Institute,

The University of Sydney

Camperdown, 2050

New South Wales, Australia

Phone: +61 411 419 047

Email: mikaela.coleman@sydney.edu.au

**AUTHOR AFFILIATIONS**

1 - Faculty of Medicine and Health, The University of Sydney, Sydney, New South Wales, Australia

2 - Tuberculosis Research Program at the Centenary Institute, The University of Sydney, Sydney,  
New South Wales, Australia

3 - Ministry of Health and Medical Services, Tarawa, Kiribati

4 - End TB and Leprosy Unit, Division of Programmes for Disease Control, WHO Regional Office for  
the Western Pacific, Manila, Philippines

5 - Epidemiological Modelling Unit, School of Public Health and Preventive Medicine, Monash  
University, Melbourne, Victoria, Australia

6 – Pacific Leprosy Foundation, Christchurch, New Zealand

7 – Department of Pathology and Biomedical Science, The University of Otago, Christchurch, New  
Zealand

1  
2  
3 8 - Australian Respiratory Council, Sydney, New South Wales, Australia  
4

5 9 - The Woolcock Institute of Medical Research, Glebe, New South Wales, Australia  
6

7 10 - South Western Sydney Clinical School, University of New South Wales, Sydney, New South  
8  
9  
10  
11  
12  
13  
14  
15  
16  
17  
18  
19  
20  
21  
22  
23  
24  
25  
26  
27  
28  
29  
30  
31  
32  
33  
34  
35  
36  
37  
38  
39  
40  
41  
42  
43  
44  
45  
46  
47  
48  
49  
50  
51  
52  
53  
54  
55  
56  
57  
58  
59  
60  
Wales, Australia

11 - Department of Clinical Immunology, Royal Prince Alfred Hospital, Camperdown, New South  
Wales, Australia

12 – The University of Sydney Institute for Infectious Diseases, Sydney, New South Wales, Australia.

**WORD COUNT:**

Abstract: 299

Strengths and limitations: 69

Main text: 5256

Contact, Acknowledgements, Funding: 205

References: 53

Tables: 4

Figures: 2

Supplement: 8

**KEYWORDS:**

tuberculosis; TB; latent tuberculosis infection; LTBI; multidrug-resistant; MDR-TB; leprosy; Hansen's  
disease; community-wide; population-wide; detection; treatment; prevention; intervention; active case  
finding; proof-of-concept; preventive treatment; TPT; universal leprosy prophylaxis; mass  
chemoprophylaxis; 3HP; rifapentine; Pacific; Kiribati

## ABSTRACT

### Introduction

Population-wide interventions offer a pathway to tuberculosis (TB) and leprosy elimination, but 'real-world' implementation in a high-burden setting using a combined approach has not been demonstrated. This implementation study aims to demonstrate the feasibility and evaluate the effect of population-wide screening, treatment and prevention on TB and leprosy incidence rates, as well as TB transmission.

### Methods and analysis

A non-randomised 'screen-and-treat' intervention conducted in the Pacific atoll of South Tarawa, Kiribati. Households are enumerated and all residents  $\geq 3$  years, as well as children  $< 3$  years with recent household exposure to TB or leprosy, invited for screening. Participants are screened using tuberculin skin testing, signs and symptoms of TB or leprosy, digital chest X-ray with computer-aided detection and sputum testing (Xpert<sup>®</sup> MTB/RIF Ultra). Those diagnosed with disease are referred to the National TB and Leprosy Program for management. Participants with TB infection are offered TB preventive treatment and those without TB disease or infection, or leprosy, are offered leprosy prophylaxis. The primary study outcome is the difference in the annual TB case notification rate before and after the intervention; a similar outcome is included for leprosy. The effect on TB transmission will be measured by comparing the estimated annual risk of TB infection in primary school children before and after the intervention, as a co-primary outcome used for power calculations. Comparison of TB and leprosy case notification rates in South Tarawa (the intervention group) and the rest of Kiribati (the control group) before, during and after the intervention is a secondary outcome.

### Ethics and dissemination

Approval was obtained from the University of Sydney Human Research Ethics Committee (project no. 2021/127) and the Kiribati Ministry of Health and Medical Services (MHMS). Findings will be shared with the MHMS and local communities, published in peer-reviewed journals and presented at international conferences.

### STRENGTHS AND LIMITATIONS OF THIS STUDY

- Real-world population-wide active case finding and prevention approach for TB and leprosy control
- Concurrent screening and treatment of TB disease and infection for durable public health impact
- Combined TB and leprosy elimination efforts increases efficiency, but also complexity
- Findings generalizable to other remote settings, but uncertain about 'disease hot spots' globally
- Non-randomised study design limits confidence in attribution of effects to the intervention

For peer review only

## INTRODUCTION

Tuberculosis (TB, caused by *Mycobacterium tuberculosis*) is a leading infectious disease killer globally and in the Pacific,<sup>1</sup> while leprosy (caused by *Mycobacterium leprae*) elimination remains a major challenge as well.<sup>2</sup> It is estimated that TB killed ~1.5 million people in 2020, despite being a preventable and curable disease.<sup>1</sup> At the 2018 United Nations High-Level Meeting on TB,<sup>3</sup> world leaders committed to step up TB elimination efforts, with improved TB case finding and expanded use of TB preventive treatment (TPT) identified as key interventions in the global “End TB strategy”.<sup>4</sup>

Historical population-wide TB elimination programmes demonstrated considerable success and are enjoying renewed attention, with specific emphasis on active case finding and prevention strategies.<sup>5,6</sup> A randomized controlled trial in Vietnam recently demonstrated that population-wide active TB case finding can achieve substantial reductions in TB incidence and transmission.<sup>7</sup> Historic studies and modelling projections suggest that this effect, and its durability, can be enhanced by concurrent treatment of TB infection,<sup>8,9</sup> but data on ‘real-life’ implementation remain scarce. Given World Health Organization (WHO) endorsement of integrated active TB case finding and preventive treatment approaches,<sup>10-15</sup> there is urgency to develop implementation models that demonstrate feasibility and population impact.

At the 2020 census, around 59% of the i-Kiribati population lived on the capital atoll of Tarawa.<sup>16</sup> Of all TB cases detected in Kiribati in 2020, 69% (267 of 385) were from Tarawa - equating to an estimated TB incidence of >500/100,000 population, the threshold incidence level above which the WHO recommends population-wide screening interventions.<sup>17</sup> *M. tuberculosis* strain typing data<sup>18</sup> and the dominance of young adults among TB cases indicate high levels of community transmission,<sup>19</sup> which emphasises the need for case finding and prevention strategies to be combined in order to prevent rapid re-infection.

Leprosy rates in Kiribati, and South Tarawa in particular, are also among the highest in the world (>200 cases/100,000 population, compared to the WHO elimination threshold of 10/100,000 population) and have been rising rapidly after a nadir in the late 1990s when elimination efforts were discontinued.<sup>2</sup> Modelling studies done in Kiribati indicate that a single population-wide active case finding intervention,

1  
2  
3 combined with 'universal leprosy prophylaxis' using single-dose rifampicin, could dramatically decrease  
4 leprosy prevalence with a sustained effect.<sup>20</sup>  
5  
6  
7  
8

9 Although both TB and leprosy pose daunting public health challenges in this resource-limited setting,  
10 their co-occurrence within a geographically defined and isolated population presents a unique  
11 opportunity to evaluate combined elimination efforts. The aim of the proposed study is to achieve major  
12 reductions in TB and leprosy incidence and transmission in South Tarawa over the medium term,  
13 providing a pathway to future elimination. If successful, the proposed study will provide a template for  
14 TB and leprosy elimination efforts throughout the Pacific and in other remote settings.  
15  
16  
17  
18  
19  
20  
21

## 22 **METHODS AND ANALYSIS**

### 23 **Study Design**

24 The PEARL study is a before and after evaluation of a population-wide systematic screening  
25 intervention, combined with a comprehensive treatment and prevention program for both TB and  
26 leprosy. It is executed in close collaboration with the Kiribati Ministry of Health and Medical Services  
27 (MHMS).  
28  
29  
30  
31  
32  
33  
34  
35

### 36 **Setting**

37 Kiribati is a lower-middle income country of ~120,000 people residing on low-lying atolls and islands in  
38 the western Pacific Ocean, with the lowest gross domestic product (GDP) per-capita of any country in  
39 Oceania.<sup>21</sup> The country has among the highest TB incidence rates in the world,<sup>22</sup> and is one of 23 WHO  
40 priority-countries for leprosy control.<sup>23</sup> Small numbers of people have been diagnosed with drug-  
41 resistant (DR-) TB (7 out of 385 cases in 2020) with limited evidence of community transmission of DR-  
42 TB. The prevalence of human immunodeficiency virus (HIV) infection is low, and no cases of TB/HIV  
43 coinfection were reported in 2019. However, there is a high burden of non-communicable disease, with  
44 the adult diabetes prevalence exceeding 20%,<sup>24</sup> high rates of childhood malnutrition and substantial  
45 levels of smoke exposure from cooking fires and cigarette smoking.<sup>25</sup>  
46  
47  
48  
49  
50  
51  
52  
53  
54  
55

56 As of November 2021, no confirmed cases of coronavirus disease 2019 (COVID-19) have been  
57 recorded in Kiribati, and no mask-wearing or social distancing measures have been employed.  
58  
59  
60



1  
2  
3 However, these practices and protocols are in place if required, should the COVID-19 pandemic spread  
4 to Kiribati. A COVID-19 vaccination programme commenced in May 2021, which is on track to achieve  
5 full vaccination coverage of >90% of the adult population by early 2022. Future public health measures  
6 to control the spread of COVID-19 will be determined by the Kiribati MHMS based on ongoing  
7 assessment of the risk posed and according to the National COVID-19 preparatory and response plan,  
8 and the standard operating procedures (SOPs) in place (Kiribati MHMS, unpublished).  
9  
10  
11  
12  
13  
14  
15

16 Tarawa atoll serves as the capital of Kiribati. Residents of villages in South Tarawa and the small  
17 communities of Buota and Abatao at the southernmost end of North Tarawa are included in the  
18 intervention and hereunder referred to as 'South Tarawa'. South Tarawa accommodates ~59% of the  
19 i-Kiribati population and has the highest rates of TB and leprosy disease. Betio Islet in particular is the  
20 most densely populated area in the Pacific with an estimated population density of >15,000 people/km<sup>2</sup>.  
21  
22  
23  
24  
25  
26  
27

28 TB case management is provided by the National TB Program (NTP). TB diagnostics available in South  
29 Tarawa include smear microscopy, rapid genotypic testing and chest X-ray, but culture facilities are  
30 unavailable. Sputum samples can be sent to the regional reference laboratory in Adelaide, Australia,  
31 for culture and susceptibility testing. However, this is problematic due to logistical issues and high rates  
32 of bacterial overgrowth. Most people with TB are hospitalised during the first few weeks of treatment at  
33 the local government hospital (Betio and Tungaru hospitals). Household contact investigation is  
34 advised, but not universally implemented because of resource constraints. National guidelines  
35 recommend TPT for household contacts for whom TB disease has been excluded, but implementation  
36 and uptake are again inconsistent. Leprosy is diagnosed using clinical assessment and microscopy,  
37 with genotypic diagnosis available by sending punch biopsy samples to the regional reference  
38 laboratory in Christchurch, New Zealand. Curative treatment, occupational therapy and chronic disease  
39 management is provided by the National Leprosy Program (NLP). Post-exposure prophylaxis (PEP) of  
40 household contacts using single-dose rifampicin (SDR) has been scaled up in recent years with the  
41 help of the Pacific Leprosy Foundation (PLF).<sup>2</sup>  
42  
43  
44  
45  
46  
47  
48  
49  
50  
51  
52  
53  
54  
55

## 56 **Study population**

57  
58  
59  
60

1  
2  
3 The study population comprises all residents of South Tarawa. All adults, adolescents and children  
4 aged three and above are included (Table 1). Children aged less than three years are included if they  
5 have documented household contact with someone who had TB (in the past 1 year), or leprosy (at any  
6 time since they were born). Household contact is defined as being between two people who have  
7 regular meals prepared in the same kitchen. Members of the study population are only excluded if they  
8 prefer not to participate.  
9  
10  
11  
12  
13  
14  
15

### 16 **Study intervention**

17  
18 The study intervention comprises population-wide systematic screening and treatment of TB disease,  
19 TB infection and leprosy, together with the provision of leprosy prophylaxis to those not requiring  
20 treatment. In practice this equates to universal leprosy prophylaxis, given that TB and leprosy treatment,  
21 as well as TPT with rifamycin-based regimens, provides adequate leprosy prophylaxis. The enrolment  
22 and screening process are summarised in Figure 1; more detailed algorithms are included in the  
23 supplement (supplements S1 and S2). The study intervention is delivered over a period of 3 years.  
24  
25  
26  
27  
28  
29  
30  
31

### 32 **Systematic screening procedures**

33  
34 All households are enumerated based on location and demographic data collected during the 2020  
35 census (Kiribati National Statistics Office 2021, unpublished). Study staff visit each residence, collect  
36 GPS coordinates, ascertain eligibility in a brief household survey conducted with the household head,  
37 and invite eligible participants for screening. During the first clinic visit, study personnel obtain written  
38 informed consent from adult participants ( $\geq 18$  years of age), or parents/legal guardians in those aged  
39  $< 18$  years, with verbal assent from children aged 10-18 years. Identifying information is collected at  
40 registration, including a photograph and a biometric identifier to aid future re-identification (facial  
41 coordinate scan 'health selfie', Simprints Technology Limited, Cambridge, UK). Study nurses complete  
42 a short TB symptom questionnaire and a brief physical examination for signs and symptoms suggestive  
43 of TB disease (visible lymph node mass or gibbus) or leprosy (suggestive skin lesions or altered shape  
44 of face, nose, ears, hands or feet).  
45  
46  
47  
48  
49  
50  
51  
52  
53  
54  
55

56 A tuberculin skin test (TST) is placed using the Mantoux method and sputum collection is attempted in  
57 all participants aged  $\geq 10$  years; age-appropriate diagnostic specimens may be collected in children  $< 10$   
58  
59  
60

1  
2  
3 years who have symptoms suggestive of TB, but it is not part of the screening procedure. Sputum  
4 specimens are tested using Xpert® MTB/RIF Ultra, recently endorsed by WHO as a sensitive front-line  
5 diagnostic test<sup>26</sup>. A digital chest X-ray (CXR) is performed on everyone aged  $\geq 10$  years, and children  
6 aged  $< 10$  years with symptoms suggestive of TB. CXR interpretation is conducted with computer-aided  
7 detection (CAD) software certified for use in TB screening (CAD4TB v6, Diagnostic Image Analysis  
8 Group, Radboud University Medical Center, Nijmegen, The Netherlands). The use of CAD software for  
9 TB screening is recommended by recent WHO guidelines, and good experiences with implementation  
10 have been reported in a variety of settings<sup>27 28</sup>. Screening CXRs for participants aged  $< 15$  years will  
11 also be interpreted by study medical staff, with the age threshold for CAD interpretation to be re-  
12 evaluated as evidence and experience accumulates during the intervention period.

13  
14  
15  
16  
17  
18  
19  
20  
21  
22  
23  
24 At a second clinic visit two days later, the TST is read and considered positive if induration is  $\geq 10$ mm,  
25 or  $\geq 5$ mm if the participant has had household contact with a person with infectious TB in the past 12  
26 months. The CXRs of all participants with a CAD score of  $\geq 50$  (and a random selection of those with  
27 scores  $< 50$ ), *M. tuberculosis* detected on Xpert® MTB/RIF Ultra or symptoms suggestive of TB will be  
28 reviewed by a study doctor. The CAD threshold score will be adjusted if necessary to optimise screening  
29 performance in the study population. Patients with bacteriologically confirmed or clinically diagnosed  
30 TB disease or leprosy will be referred to the Kiribati NTP or NLP for treatment, with close coordination  
31 between study and program clinicians.

### 32 33 34 35 36 37 38 39 40 41 ***TB preventive treatment eligibility***

42  
43 Participants with a positive TST or children  $< 5$  years with recent household contact are considered for  
44 TPT if they do not have TB disease and have not completed a course of TB treatment or TPT within  
45 the last 12 months. Potential TPT contraindications (eg. allergies to TB medicines, risk factors for  
46 hepatotoxicity) are assessed using a brief questionnaire. There is a high prevalence of hepatitis B virus  
47 (HBV) infection among older people in Kiribati;<sup>29</sup> routine HBV vaccination introduced in the 1990s  
48 reduced infection rates among younger people<sup>30</sup>. A point-of-care HBV rapid test (Determine™ HBsAg  
49 2) is performed in all participants aged 40-59 years who agree to TPT and are otherwise at low risk  
50 (liver function testing is done in everyone  $\geq 60$  years), since they are at increased risk of HBV infection  
51  
52  
53  
54  
55  
56  
57  
58  
59  
60

1  
2  
3 and possible liver disease. Participants diagnosed with HBV infection receive a liver function test prior  
4  
5 to TPT initiation and are referred to the HBV treatment programme for management.  
6  
7

### 8 9 ***Hepatotoxicity risk assessment***

10 Baseline serum alanine aminotransferase (ALT) testing is conducted in all participants aged  $\geq 60$  years,  
11  
12 or with identified risk factors for hepatotoxicity, and results stratified according to hepatotoxicity risk  
13  
14 (Table 2). Participants with ALT  $\geq 3$ x upper limit of normal (ULN) are not offered TPT, those with ALT 2-  
15  
16 3x ULN are offered TPT (if the bilirubin in  $< 2$ x ULN) with repeat ALT testing after 3-4 weeks, and  
17  
18 participants with ALT  $< 2$ x ULN (or no need for a baseline test) are offered TPT without further ALT  
19  
20 monitoring. All participants receive information on the signs and symptoms of hepatotoxicity, guidance  
21  
22 to limit alcohol and kava intake and access to a 'hotline' linked to a rapid evaluation service.  
23  
24  
25

### 26 27 ***TB preventive treatment regimens and treatment initiation***

28 Participants who are eligible, have no contraindications and accept TPT, are offered a choice of short-  
29  
30 course rifamycin-based regimens according to clinical characteristics, patient preference and  
31  
32 availability. Currently used regimens are: 12 weekly doses of isoniazid and rifapentine (3HP), four  
33  
34 months of daily rifampicin (4R), or 3 months of daily isoniazid and rifampicin (3RH, preferred for young  
35  
36 children due to availability of child-friendly water-dispersible formulations). Dosing is chosen according  
37  
38 to recommendations from the WHO and the Kiribati NTP. In participants with a documented history of  
39  
40 household contact with someone diagnosed with DR-TB, TPT using six months of daily levofloxacin is  
41  
42 considered under expert guidance<sup>31 32</sup>. New evidence and normative guidance supporting the use of  
43  
44 shorter TPT regimens may be released during the study. Consistent with the implementation approach,  
45  
46 additional regimens may be offered to participants in collaboration with the Kiribati NTP and with  
47  
48 updated ethical approval. All medicines used in the study will be obtained from WHO prequalified  
49  
50 manufacturers, procured from the Global Drug Facility.  
51  
52

### 53 54 ***Community-based TB preventive treatment adherence support and monitoring***

55 At each stage of treatment initiation, adherence support, treatment monitoring, management of adverse  
56  
57 events and assignment of treatment outcome, participants are provided with appropriate counselling on  
58  
59 risks, benefits and options available. A detailed patient information sheet is provided (supplement S3)  
60

1  
2  
3 together with group and/or individual counselling with the aid of an illustrated flip chart and a 'TPT  
4 passport' (supplements S4 and S5) to assist adherence and adverse event monitoring. After taking the  
5 first dose under direct supervision, TPT will be self-administered with use of pragmatic adherence  
6 support strategies tailored to the particular study community. Medicines are dispensed in 4-8 week  
7 intervals, or according to patient preference and adherence. All participants who commence TPT are  
8 visited once after 3-4 weeks to support adherence and screen for adverse events, and again when they  
9 near TPT completion to assess treatment adherence and either extend treatment or assign a treatment  
10 outcome. Additional supportive visits are scheduled as needed. Assessment of adherence is performed  
11 and recorded at each visit by interviewing the participant, reviewing the TPT passport and counting  
12 remaining pills. Treatment completion is determined according to WHO recommendations (Table 3).  
13  
14  
15  
16  
17  
18  
19  
20  
21  
22  
23

### 24 ***Detection and management of adverse events***

25  
26 This is an implementation study that uses medicines recommended by the Kiribati NTP and which have  
27 been shown to be safe and effective.<sup>10 33-38</sup> Adverse events associated with the study intervention  
28 (defined as any untoward medical occurrence in a study participant) are similar to those encountered  
29 in routine programme delivery. Misidentification and misclassification will be minimised through  
30 adequate planning and testing of all procedures, using ongoing quality assurance measures built into  
31 a secure Research Electronic Data Capture (REDCap) database<sup>39</sup> and close oversight from local study  
32 coordinators. Linkage to care for referrals to government treatment programs (TB, leprosy, hepatitis)  
33 will be monitored.  
34  
35  
36  
37  
38  
39  
40  
41  
42

43 Participants receiving TPT will have access to a team of community health workers, a 'TPT hotline',  
44 and a walk-in service for adverse event assessment and management. Study staff are trained to identify  
45 the most common and most severe adverse events associated with TPT, with a particular focus on  
46 hepatotoxicity. Drug-related adverse events are triaged and referred for further medical evaluation as  
47 appropriate, including liver function testing. If needed, referral and linkage to urgent care services is  
48 available.  
49  
50  
51  
52  
53

54  
55  
56 The following drug-related adverse events will be recorded and reported as part of the study:  
57  
58  
59  
60

- Drug-induced liver injury (DILI - defined as suggestive symptoms plus ALT >3 times upper limit of normal or ALT >5 times upper limit of normal without symptoms) while on TPT
- Drug-related adverse events resulting in TPT interruption or cessation<sup>40</sup>
- All serious adverse events among people taking TPT (SAEs, as defined by the Australian National Health and Medical Research Council)<sup>41</sup>

Anyone with DILI during treatment or with an abnormal ALT ( $\geq 2x$  ULN) at baseline will receive an HBV rapid test (if not previously performed). In addition, blood drawn from participants with DILI and matched controls will be stored (with additional consent) for expanded risk factor determination, using an efficient nested case-control study design.

Other adverse events that will be recorded include:

- Misclassification or misinterpretation of screening results resulting in mistreatment
- Post-positive screen treatment delay for TB disease (>7 days) and leprosy (>14 days)

### ***Leprosy prophylaxis***

All participants who do not commence any other form of treatment are eligible for leprosy prophylaxis using SDR. Those who commence treatment for TB or leprosy, or TPT using 3HP or 3HR, already receive multiple doses of a rifamycin as part of those regimens, which constitutes effective leprosy prophylaxis. Contraindications (Table 4) are assessed and if none are found SDR is given as directly observed treatment (DOT), dosed according to WHO age and weight bands (with dispersible tablets for children <25kg).<sup>42</sup>

SDR is well tolerated and widely used for post-exposure prophylaxis in household contacts of people with leprosy<sup>43 44</sup> and recognised as an effective measure to reduce leprosy prevalence if applied at a population scale in high incidence settings.<sup>20 44 45</sup> Among published studies evaluating leprosy prophylaxis, SDR was reported to be safe with no observed SAEs,<sup>43</sup> and we are not aware of any SAEs reported during programmatic implementation. Offering either SDR, 3HP, 3HR, TB treatment and/or leprosy treatment to every participant equates to a single mass drug administration intervention.

Ongoing screening of close contacts of leprosy cases, with PEP provision, will continue beyond the study intervention, supported by the PLF. The PLF have conducted leprosy contact tracing and PEP using SDR in Kiribati since 2010 and are committed to continue this work.

## **Outcome measures**

### ***Primary outcomes***

The first primary outcome measure of this study is the difference between TB case notification rates in South Tarawa, recorded from NTP data, during the 12 months before the intervention (2020) and the 12 months after it concludes (2024/5). The denominator is the population of South Tarawa, as reported by the National Statistics Office. This outcome measure has been chosen to reflect the programmatic intent of the intervention, and the aim of the study to effect a step-change in TB prevalence as a pathway to elimination. Annual TB notification rates will be monitored throughout the study period and are expected to first increase as a result of active case finding, before declining towards the end of the intervention and after its completion.

The second primary outcome measure is estimated annual risk of TB infection (ARTI) among primary school children in South Tarawa, measured by TST before and 6 months after the intervention. This outcome measure has been chosen to assess the impact of the intervention on community transmission of TB. Together, the primary outcomes allow us to assess the public health and epidemiological impact of the TB intervention.

### ***Secondary outcomes***

1. Population prevalence of TST positivity in different age bands.
2. Description of the disease spectrum and risk factors observed among people with TB and/or leprosy.
3. Comparison of TB case notification rates in South Tarawa (the intervention site) and the rest of Kiribati (control) before, during and after the intervention.
4. Percentage of participants retained at each step along the 'cascade of care'<sup>46</sup> (invited to screening, TST placed, TST read, completed screening, offered TPT, commenced TPT, completed TPT).

- 1
- 2
- 3 5. Diagnostic yield of mobile digital CXRs with CAD, compared to sputum testing using Gene
- 4 Xpert® MTB/RIF Ultra, in patients who had both tests performed
- 5
- 6
- 7 6. Incidence rate of DILI among people taking TPT, and the population attributable fraction of HBV
- 8 infection and other documented risk factors
- 9
- 10
- 11 7. Difference in leprosy case notification rates in South Tarawa, recorded from NLP data, during
- 12 the 12 months before the intervention (2020) and the 12 months after its conclusion (2024/5).
- 13
- 14 8. Comparison of leprosy case notification rates in South Tarawa (the intervention site) and the
- 15 rest of Kiribati (control) before, during and after the intervention.
- 16
- 17 9. Spatial analysis of TB and leprosy cases detected during the intervention, including data
- 18 visualisation (mapping and interpolation), identification of spatial clusters, and spatial statistical
- 19 modelling.
- 20
- 21 10. Documenting the cost of the combined intervention, as well as TB and leprosy components
- 22 separately, to estimate the incremental cost-effectiveness ratio in comparison to modelled
- 23 outcomes without the intervention
- 24
- 25
- 26
- 27
- 28
- 29
- 30
- 31
- 32

### 33 **Sample Size**

34 For the TB and leprosy case notification rate outcomes, the sample size is the whole population of  
35 South Tarawa (total population 65,566 at the 2020 census, Kiribati National Statistics Office 2021).  
36 Additional analysis of the sensitivity of our study design to detect an effect on TB and leprosy case  
37 notification rates is included as supplementary material (supplements S6 and S7). The ARTI outcome  
38 is calculated from estimated TB infection prevalence using the formula  $ARTI = 1 - (1 - TB \text{ infection}$   
39  $prevalence)^{1/a}$ , where  $a = \text{mean age}$ , estimated as 1.8% / year in primary school-aged children (mean  
40 age 9 years, TB infection prevalence 15%).<sup>47</sup> The ability to detect a 50% reduction in ARTI with a power  
41 of 0.8 (alpha of 0.05), comparing two samples of children at baseline and after the intervention, requires  
42 a sample size of 2,580 children at each measurement (G\*Power 3.1).<sup>48</sup> Primary school children will be  
43 representatively sampled from the same age categories and schools at both measurements.  
44  
45  
46  
47  
48  
49  
50  
51  
52  
53  
54

### 55 **Governance**

56 The Study Management Committee (responsible for day-to-day running and monitoring of the study) is  
57 composed of the Kiribati-based medical lead, an i-Kiribati doctor nominated by the Kiribati MHSM, the  
58  
59  
60



1  
2  
3 Kiribati-based nursing lead, the study coordinator, the overall study lead and the education coordinator.  
4  
5 All SAEs are reported within 1 week of its recognition to the University of Sydney Human Research  
6  
7 Ethics Committee and the Kiribati MHMS by the study coordinator. An independent Data Safety and  
8  
9 Monitoring Board will assess study progress and the adverse events recorded and reported as  
10  
11 described above. Figure 2 provides an overview of governance arrangements.  
12  
13

## 14 **ETHICS AND DISSEMINATION**

### 15 **Ethical issues**

16  
17  
18 Adults aged  $\geq 18$  years provide written informed consent (supplement S8). Written parental or caregiver  
19  
20 consent is provided for children and adolescents aged  $< 18$  years, with those aged 10-18 years asked  
21  
22 to provide verbal assent that is recorded. Participants may voluntarily withdraw from the study at any  
23  
24 time. All records are strictly confidential, and all study data will be collected on password-protected  
25  
26 electronic devices. A complete database will be stored on a high security data repository administered  
27  
28 by the University of Sydney in Sydney, Australia. Relevant data will be extracted for the Kiribati MHMS  
29  
30 and NTP as required for clinical or public health purposes, and made available at study completion for  
31  
32 future patient care and population benefit.  
33

34  
35  
36 Particular attention is given to handling of biometric data, which has been included in the study  
37  
38 procedures after close consultation with the Kiribati MHMS and extensive collaboration with the  
39  
40 biometric identification provider. Biometric identifiers are captured in a standalone mobile application  
41  
42 and stored in a secure database maintained by the biometric identification provider, which is separate  
43  
44 from the study database and inaccessible to users. Records in the two databases are linked by a  
45  
46 unique, randomly generated identifier. When study staff use biometric identification to retrieve a  
47  
48 participant record, the linking identifier is accessed by the biometric identification application without  
49  
50 further input by the user. Participants are free to refuse or withdraw consent to record biometric identifier  
51  
52 data, while still participating in the study. Participants are specifically asked for consent to share  
53  
54 biometric identification data with the Kiribati MHMS, and are free to refuse or withdraw.  
55

### 56 **Dissemination**

57  
58  
59  
60

1  
2  
3 Study findings will be presented at international conferences and submitted for publication in peer-  
4 reviewed journals. Findings will also be disseminated through the websites of collaborating  
5 organisations and in writing to donors. Editable resources developed for the study will be posted on the  
6 study website for free-to-use access: [www.thepearlstudy.org](http://www.thepearlstudy.org). Future authorship will include all  
7 substantial contributors to the work and there will be a statement of the role of the funder and any  
8 potential conflicts of interest. There will be due recognition and acknowledgement of study participants,  
9 local study staff and contributions made by i-Kiribati colleagues. There is an overarching commitment  
10 to involve i-Kiribati colleagues in all aspects of the study design and execution and to invest in local  
11 capacity building. Interim and final reports will be shared with the Kiribati MHMS, with regular updates  
12 provided to the i-Kiribati public and study participants.  
13  
14  
15  
16  
17  
18  
19  
20  
21  
22  
23

### 24 **Patient and Public Involvement**

25  
26 There was no patient involvement in the design of the study. The study is strongly aligned with national  
27 priorities in Kiribati, which recognises TB and leprosy as major infectious disease challenges.<sup>49</sup> The  
28 study was informed by the need for an urgent TB and leprosy control solution in Kiribati, as articulated  
29 by the Kiribati MHMS. A community Stakeholder Engagement Group comprised of i-Kiribati TB and  
30 leprosy survivors, local lay leadership and health practitioners will provide community feedback and  
31 guidance throughout the intervention period. Patient advisors will be thanked in the acknowledgements  
32 of future study publications. Testing TB elimination strategies in the Pacific is also aligned with the  
33 'Regional Framework for Action on Implementation of the End TB Strategy in the Western Pacific'.<sup>50</sup>  
34 The framework calls for a paradigm shift in TB control and articulates a need to "integrate diagnosis  
35 and management of LTBI into systematic screening for TB disease among high-risk populations".<sup>50 51</sup>  
36  
37  
38  
39  
40  
41  
42  
43  
44  
45  
46

### 47 **Training, monitoring and evaluation**

48  
49 Building skills, knowledge and workforce capacity is seen as an essential component of the study.  
50 Regular staff development training will be conducted by the Australian Respiratory Council. Senior  
51 research staff and the Kiribati MHMS will conduct ongoing internal monitoring. Data quality control and  
52 critical review of processes will be performed on a weekly basis throughout the study by the data  
53 manager. Protocol compliance, recruitment, screening and treatment practice, and laboratory  
54 processes will be externally reviewed on a quarterly basis, with physical inspection whenever possible.  
55  
56  
57  
58  
59  
60

### Data management and analysis

Data will be collected offline in a standardised fashion and captured on electronic tablets, with daily upload into a secure web-based REDcap database.<sup>39</sup> Participants will be assigned a unique study identifier at enrolment, which will be matched with identifying data including a photograph and a biometric identifier (Simprints, Cambridge, UK). This will add accuracy to retrieval of patient records and reduce misidentification. The data manager will review data uploads on a daily basis. At the end of the intervention and while awaiting conduct of the final TST survey among school children, we will complete data cleaning and start analysis. At this time, we will also consolidate the transfer of knowledge and skills and focus on assisting the Kiribati MHMS with longer term planning. A detailed data analysis plan will be drafted focusing on the primary and secondary outcome measures articulated above. In order to assess the durability of the effect we will track annual TB and leprosy case notification numbers beyond the end of the project, which should also inform future interventions and complementary studies.

### DISCUSSION

Ambitious action is needed to change the course of the global TB epidemic, and to make up ground lost to the COVID-19 pandemic. Scaling up access to systematic screening and TPT for high-burden communities has been identified as a key intervention to achieve this,<sup>52</sup> and is reflected in multilateral targets and commitments. For example, at the UN High Level Meeting on TB held in 2018, countries committed to providing 20 million courses of TPT to HIV-negative adult household contacts. Less than 1% of this target has been met, despite abundant evidence that these individuals are at high risk of developing TB and perpetuating the cycle of transmission at the community level.

Recently published WHO guidelines on systematic screening for TB recommend that population level systematic screening can be adopted where the estimated incidence is above 500/100,000 – this threshold is met in South Tarawa. Current WHO TPT guidelines state that population-based TB infection testing and treatment is not considered feasible in the absence of locally available tests for TB infection and reliable tests to rule out TB disease, and while it is recognised that it may assist TB elimination efforts, the public health benefit remains unproven.<sup>32</sup> A population-wide intervention to

1  
2  
3 diagnose and treat TB disease and infection was recently implemented in the Marshall Islands; the 'TB  
4 and Leprosy Free Majuro'<sup>53</sup> project demonstrated the safety and feasibility of this approach in a Pacific  
5 context. For leprosy, WHO acknowledges that universal leprosy prophylaxis, in addition to active case  
6 finding, can be valuable to assist elimination efforts,<sup>43</sup> which presents a major opportunity for combined  
7 TB and leprosy elimination efforts.  
8  
9  
10  
11  
12  
13

14 Implementing a comprehensive TB elimination strategy in South Tarawa has important benefits for TB  
15 control. First, population-wide active case finding will facilitate early TB disease detection and  
16 treatment, reducing associated morbidity and mortality and limiting ongoing TB transmission within the  
17 community. Second, detection and treatment of TB infection will reduce future disease re-activation  
18 and greatly increase the durability of the positive impact achieved by the intervention. The feasibility of  
19 such an ambitious project is highly dependent on support from the people of South Tarawa, strong  
20 political commitment from the Kiribati government and cooperation with relevant partners and  
21 stakeholders. Third, this study will provide detailed information on the prevalence of TB infection, active  
22 TB and leprosy, and document the impact of population-wide screening approaches to inform modelling  
23 of TB and leprosy control strategies in the Pacific.<sup>9 20</sup>  
24  
25  
26  
27  
28  
29  
30  
31  
32  
33  
34  
35

36 Beyond the domain of TB control, this study will also strengthen the health system of Kiribati. Updated  
37 household- and individual-level information collected during the study will facilitate public health  
38 interventions in other disease areas as well. Leprosy screening is included in the main intervention, and  
39 a proportion of participants will be screened for HBV; these activities will be accompanied by system  
40 changes that align the efforts of the three disease control programmes and could serve as an example  
41 in other areas. Strengthened laboratory and radiology capacity will have benefits for the health system  
42 overall: for example, expansion of access to genotypic diagnosis and digital X-ray systems with CAD  
43 software would both be of direct benefit in the event of a COVID-19 outbreak. Ultimately, this study is  
44 aligned with national and regional priorities for health system strengthening and universal health care.  
45  
46  
47  
48  
49  
50  
51  
52  
53

54 Study limitations include the reliance on case notification rates as a primary outcome measure, which  
55 reflects the operational nature of the intervention. Early diagnosis and treatment of cases through active  
56 case finding using sensitive tests may increase the measured effect, due to lead time bias. The  
57  
58  
59  
60

1  
2  
3 provision of TPT to all participants with TB infection will reduce the number of incipient disease cases;  
4 also adding to potential lead time bias. However, the impact measured will reflect 'real world' reductions  
5 achieved and monitoring TB incidence rates before, throughout, and for an extended period after the  
6 intervention will allow us to reflect on the potential impact of lead time bias and to assess the durability  
7 of the reductions achieved. Comparing ARTI before and after the intervention provides an objective  
8 marker of community transmission, which is not affected by lead time bias. This could also be  
9 supplemented by a third ARTI assessment 3-5 years after study completion to assess the durability of  
10 the effect, if resources are available.  
11  
12  
13  
14  
15  
16  
17  
18  
19

20 The PEARL study benefits from extensive collaboration with the Kiribati MHMS, NTP, NLP and other  
21 agencies, as well as established partnerships with the PLF, the WHO Western Pacific Regional Office  
22 (Manila, Philippines), the office of the WHO Representative in the South Pacific (Suva, Fiji), the United  
23 Nations Development Program (UNDP) and the Australian Department of Foreign Affairs and Trade  
24 (DFAT) amongst others. In addition, extensive community engagement, communication and  
25 mobilisation forms the cornerstone of study implementation. Pacific island countries and territories like  
26 Kiribati are in a unique position, given their geographic isolation and limited population size, to 'lead the  
27 way' by implementing ambitious elimination strategies that serve as proof-of-principle for others to learn  
28 from and replicate.  
29  
30  
31  
32  
33  
34  
35  
36  
37  
38  
39

## 40 **CONCLUSION**

41 The PEARL study addresses the need for rigorous implementation science to assess the feasibility and  
42 impact of population-wide active case finding and treatment, combined with testing and treatment for  
43 TB infection, to durably reduce the TB burden in high incidence settings. The study also explores  
44 complementarity between TB and leprosy elimination efforts, with the promise of developing scalable  
45 strategies suitable for remote settings with high disease burdens.  
46  
47  
48  
49  
50  
51  
52  
53  
54  
55  
56  
57  
58  
59  
60

### Contact for public and scientific queries

The contact for scientific and public queries is the Principal Investigator, Professor Ben Marais ([ben.marais@sydney.edu.au](mailto:ben.marais@sydney.edu.au)).

### Study status

Advanced preparation

### Contributors

BJM wrote the initial study proposal. MC and JH contributed equally to this paper. MC, JH, GJF, ET, AT, BE, TI, JMT, STC, AC, GBM, WJB and BJM made important intellectual contributions to the final study protocol. GBM and GJF performed sample size calculations. MC prepared the first draft of the manuscript. The funding agency played no part in any aspect of the study, nor the decision to submit this manuscript for publication.

### Competing interests

None declared.

### Funding

This work is supported by the Australian Medical Research Future Fund (MRFF) grant, APP1200755 and the Pacific Leprosy Foundation. The investigators are also supported by the National Health and Medical Research Council Centre of Research Excellence in Tuberculosis Control on both sides of the border (APP1153493). The Australian Department of Foreign Affairs and Trade (DFAT) awarded additional equipment funding to the project.

### Acknowledgements

The authors would like to extend sincere thanks to Jill Tomlinson, the CEO of the Pacific Leprosy Foundation and to the staff of the Kiribati NTP and NLP for their outstanding support and contributions to the PEARL study.

1  
2  
3 **REFERENCES**  
4

- 5 1. WHO. Global Tuberculosis Report 2021. In: Organisation WH, ed. Geneva, 2021.
- 6
- 7 2. Chambers ST, Iotaba N, Timeon E, et al. Surveillance of Leprosy in Kiribati, 1935–2017. *Emerging*  
8  
9 *Infectious Diseases* 2020;26(5):833.
- 10 3. WHO. Political declaration of the UN General-Assembly High-Level Meeting on the Fight Against  
11  
12 Tuberculosis. In: World Health Organisation WTP, ed.  
13  
14 [https://www.who.int/publications/m/item/political-declaration-of-the-un-general-assembly-high-](https://www.who.int/publications/m/item/political-declaration-of-the-un-general-assembly-high-level-meeting-on-the-fight-against-tuberculosis)  
15  
16 [level-meeting-on-the-fight-against-tuberculosis](https://www.who.int/publications/m/item/political-declaration-of-the-un-general-assembly-high-level-meeting-on-the-fight-against-tuberculosis), 2019.
- 17
- 18 4. WHO. The END TB Strategy. [https://www.who.int/tb/strategy/End\\_TB\\_Strategy.pdf](https://www.who.int/tb/strategy/End_TB_Strategy.pdf), 2014.
- 19
- 20 5. MSF. Step up for TB report 2020. In: partnership TST, ed. <https://www.msf.org/step-tb-report-2020>,  
21  
22 2020.
- 23
- 24 6. Comstock GW, Ferebee SH, Hammes LM. A controlled trial of community-wide isoniazid  
25  
26 prophylaxis in Alaska. *Am Rev Respir Dis* 1967;95(6):935-43. doi:  
27  
28 10.1164/arrd.1967.95.6.935 [published Online First: 1967/06/01]
- 29
- 30 7. Marks GB, Nguyen NV, Nguyen PTB, et al. Community-wide Screening for Tuberculosis in a High-  
31  
32 Prevalence Setting. *N Engl J Med* 2019;381(14):1347-57. doi: 10.1056/NEJMoa1902129  
33  
34 [published Online First: 2019/10/03]
- 35
- 36 8. Dye C, Glaziou P, Floyd K, et al. Prospects for tuberculosis elimination. *Annu Rev Public Health*  
37  
38 2013;34:271-86. doi: 10.1146/annurev-publhealth-031912-114431 [published Online First:  
39  
40 2012/12/19]
- 41
- 42 9. Ragonnet R, Williams BM, Largen A, et al. Estimating the long-term effects of population-wide  
43  
44 screening for latent and active tuberculosis in the Republic of the Marshall Islands. *medRxiv*  
45  
46 2021:2021.03.03.21252859. doi: 10.1101/2021.03.03.21252859
- 47
- 48 10. Churchyard GJ, Swindells S. Controlling latent TB tuberculosis infection in high-burden countries:  
49  
50 A neglected strategy to end TB. *PLoS Med* 2019;16(4):e1002787. doi:  
51  
52 10.1371/journal.pmed.1002787 [published Online First: 2019/04/24]
- 53
- 54 11. Getahun H, Matteelli A, Chaisson RE, et al. Latent Mycobacterium tuberculosis infection. *N Engl J*  
55  
56 *Med* 2015;372(22):2127-35. doi: 10.1056/NEJMra1405427 [published Online First:  
57  
58 2015/05/29]
- 59
- 60

- 1  
2  
3 12. Houben RM, Dodd PJ. The Global Burden of Latent Tuberculosis Infection: A Re-estimation Using  
4  
5 Mathematical Modelling. *PLoS Med* 2016;13(10):e1002152. doi:  
6  
7 10.1371/journal.pmed.1002152 [published Online First: 2016/10/26]  
8
- 9 13. Saunders MJ, Evans CA. Ending Tuberculosis through Prevention. *N Engl J Med*  
10  
11 2019;380(11):1073-74. doi: 10.1056/NEJMe1901656 [published Online First: 2019/03/14]  
12
- 13 14. Rangaka MX, Cavalcante SC, Marais BJ, et al. Controlling the seedbeds of tuberculosis:  
14  
15 diagnosis and treatment of tuberculosis infection. *Lancet* 2015;386(10010):2344-53. doi:  
16  
17 10.1016/s0140-6736(15)00323-2 [published Online First: 2015/10/31]  
18
- 19 15. WHO. WHO operational handbook on tuberculosis: module 1: prevention: tuberculosis preventive  
20  
21 treatment. 2020
- 22 16. Group WB. Kiribati Health Financing System Assessment: Spend Better. In: Bank W, ed.  
23  
24 Washington, DC 2018.  
25
- 26 17. Organization WH. The end TB strategy: World Health Organization, 2015.  
27
- 28 18. Aleksic E, Merker M, Cox H, et al. First molecular epidemiology study of Mycobacterium  
29  
30 tuberculosis in Kiribati. *PLoS One* 2013;8(1):e55423. doi: 10.1371/journal.pone.0055423  
31  
32 [published Online First: 2013/02/06]  
33
- 34 19. Morishita F VK, Lowbridge C, Rahevar K, Islam T, Marais BJ. . Epidemiology of tuberculosis in the  
35  
36 Western Pacific Region: Progress toward the 2020 milestone of the End TB Strategy.  
37  
38 *WPSAR* 2020;in press
- 39 20. Gilkison C, Chambers S, Blok DJ, et al. Predicting the impact of household contact and mass  
40  
41 chemoprophylaxis on future new leprosy cases in South Tarawa, Kiribati: A modelling study.  
42  
43 *PLoS Negl Trop Dis* 2019;13(9):e0007646. doi: 10.1371/journal.pntd.0007646 [published  
44  
45 Online First: 2019/09/21]  
46
- 47 21. Bank TW. Data Catalog: GDP per capita In: Bank TW, ed. Data Catalog.  
48  
49 datacatalog.worldbank.org, 2019.  
50
- 51 22. Bank TW. Incidence of tuberculosis (per 100,000 people). World Health Organization, Global  
52  
53 Tuberculosis Report 2020.  
54  
55 [https://data.worldbank.org/indicator/SH.TBS.INCD?most\\_recent\\_value\\_desc=true](https://data.worldbank.org/indicator/SH.TBS.INCD?most_recent_value_desc=true): The World  
56  
57 Bank, 2021.  
58  
59  
60



- 1  
2  
3 23. Organisation WH. Leprosy - New cases detection rate per 100 000 population. The Global Health  
4 Observatory. [https://www.who.int/data/gho/data/indicators/indicator-details/GHO/leprosy---](https://www.who.int/data/gho/data/indicators/indicator-details/GHO/leprosy---new-cases-detection-rate-per-100-000-population)  
5 [new-cases-detection-rate-per-100-000-population](https://www.who.int/data/gho/data/indicators/indicator-details/GHO/leprosy---new-cases-detection-rate-per-100-000-population): World Health Data Platform, 2020.  
6  
7  
8  
9 24. Saeedi P, Petersohn I, Salpea P, et al. Global and regional diabetes prevalence estimates for  
10 2019 and projections for 2030 and 2045: Results from the International Diabetes Federation  
11 Diabetes Atlas. *Diabetes research and clinical practice* 2019;157:107843.  
12  
13  
14 25. Hoy D, Kienene T, Reiher B, et al. Battling tuberculosis in an island context with a high burden of  
15 communicable and non-communicable diseases: epidemiology, progress, and lessons  
16 learned in Kiribati, 2000 to 2012. *Int J Infect Dis* 2015;30:135-41. doi:  
17 10.1016/j.ijid.2014.11.025 [published Online First: 2014/12/03]  
18  
19  
20 26. WHO. WHO Rapid Communication: Molecular assays as initial tests for the diagnosis of  
21 tuberculosis and rifampicin resistance. In: Organisation WH, ed.  
22 <https://www.who.int/tb/publications/2020/rapid-communications-molecular-assays/en/>.  
23  
24  
25  
26  
27 27. Organisation WH. WHO consolidated guidelines on tuberculosis Module 2: Screening –  
28 Systematic screening for tuberculosis diseases. *Global Tuberculosis Programme* 2021  
29  
30  
31 28. Madhani F, Maniar RA, Burfat A, et al. Automated chest radiography and mass systematic  
32 screening for tuberculosis. *Int J Tuberc Lung Dis* 2020;24(7):665-73. doi:  
33 10.5588/ijtld.19.0501 [published Online First: 2020/07/29]  
34  
35  
36 29. Patel MK, Wannemuehler K, Tairi R, et al. Progress towards achieving hepatitis B control in the  
37 Cook Islands, Niue, Tokelau, and Kiribati. *Vaccine* 2016;34(36):4298-303. doi:  
38 10.1016/j.vaccine.2016.06.083 [published Online First: 2016/07/13]  
39  
40  
41 30. Jackson K, Tekoaua R, Holgate T, et al. Hepatitis B and D in the Pacific Islands of Kiribati. *J Clin*  
42 *Viro* 2020;129:104527. doi: 10.1016/j.jcv.2020.104527 [published Online First: 2020/07/10]  
43  
44  
45 31. Fox GJ, Oxlade O, Menzies D. Fluoroquinolone Therapy for the Prevention of Multidrug-Resistant  
46 Tuberculosis in Contacts. A Cost-Effectiveness Analysis. *Am J Respir Crit Care Med*  
47 2015;192(2):229-37. doi: 10.1164/rccm.201501-0069OC [published Online First: 2015/04/29]  
48  
49  
50 32. WHO. WHO consolidated guidelines on tuberculosis: tuberculosis preventive treatment: module 1:  
51 prevention: tuberculosis preventive treatment. 2020  
52  
53  
54  
55  
56  
57  
58  
59  
60

- 1  
2  
3 33. Walker RE, Bass S, Srinivas P, et al. Evaluation of 3 Months of Once-Weekly Rifapentine and  
4 Isoniazid for Latent Tuberculosis Infection. *Ann Pharmacother* 2020;54(5):457-63. doi:  
5 10.1177/1060028019888855 [published Online First: 2019/11/16]  
6  
7  
8  
9 34. Alvarez GG, Van Dyk D, Mallick R, et al. The implementation of rifapentine and isoniazid (3HP) in  
10 two remote Arctic communities with a predominantly Inuit population, the Taima TB 3HP  
11 study. *Int J Circumpolar Health* 2020;79(1):1758501. doi: 10.1080/22423982.2020.1758501  
12 [published Online First: 2020/05/08]  
13  
14  
15  
16 35. Wheeler C, Mohle-Boetani J. Completion Rates, Adverse Effects, and Costs of a 3-Month and 9-  
17 Month Treatment Regimen for Latent Tuberculosis Infection in California Inmates, 2011-2014.  
18 *Public Health Rep* 2019;134(1\_suppl):71s-79s. doi: 10.1177/0033354919826557 [published  
19 Online First: 2019/05/07]  
20  
21  
22  
23  
24 36. Hamada Y, Ford N, Schenkel K, et al. Three-month weekly rifapentine plus isoniazid for  
25 tuberculosis preventive treatment: a systematic review. *Int J Tuberc Lung Dis*  
26 2018;22(12):1422-28. doi: 10.5588/ijtld.18.0168 [published Online First: 2019/01/05]  
27  
28  
29  
30 37. Pease C, Hutton B, Yazdi F, et al. A systematic review of adverse events of rifapentine and  
31 isoniazid compared to other treatments for latent tuberculosis infection. *Pharmacoepidemiol*  
32 *Drug Saf* 2018;27(6):557-66. doi: 10.1002/pds.4423 [published Online First: 2018/03/25]  
33  
34  
35  
36 38. Sterling TR, Villarino ME, Borisov AS, et al. Three months of rifapentine and isoniazid for latent  
37 tuberculosis infection. *N Engl J Med* 2011;365(23):2155-66. doi: 10.1056/NEJMoa1104875  
38 [published Online First: 2011/12/14]  
39  
40  
41  
42 39. Harris PA, Taylor R, Thielke R, et al. Research electronic data capture (REDCap)—a metadata-  
43 driven methodology and workflow process for providing translational research informatics  
44 support. *Journal of biomedical informatics* 2009;42(2):377-81.  
45  
46  
47  
48 40. Health N, Council MR. Guidance: safety monitoring and reporting in clinical trials involving  
49 therapeutic goods. 2016  
50  
51 41. NHMRC. Guidance: Safety monitoring and reporting in clinical trials involving therapeutic goods.  
52 In: Australian Department of Health TGA, ed. [https://www.nhmrc.gov.au/about-](https://www.nhmrc.gov.au/about-us/publications/safety-monitoring-and-reporting-clinical-trials-involving-therapeutic-goods)  
53 [us/publications/safety-monitoring-and-reporting-clinical-trials-involving-therapeutic-goods:](https://www.nhmrc.gov.au/about-us/publications/safety-monitoring-and-reporting-clinical-trials-involving-therapeutic-goods)  
54  
55  
56 National Health and Medical Research Council, 2016.  
57  
58  
59  
60

- 1  
2  
3 42. WHO. Guidelines for the diagnosis, treatment and prevention of leprosy.  
4  
5 <https://apps.who.int/iris/handle/10665/274127>, 2018.  
6  
7 43. Richardus JH, Tiwari A, Barth-Jaeggi T, et al. Leprosy post-exposure prophylaxis with single-dose  
8 rifampicin (LPEP): an international feasibility programme. *Lancet Glob Health* 2021;9(1):e81-  
9 e90. doi: 10.1016/s2214-109x(20)30396-x [published Online First: 2020/11/02]  
10  
11 44. Schoenmakers A, Mieras L, Budiawan T, et al. The State of Affairs in Post-Exposure Leprosy  
12 Prevention: A Descriptive Meta-Analysis on Immuno- and Chemo-Prophylaxis. *Res Rep Trop*  
13 *Med* 2020;11:97-117. doi: 10.2147/rrtm.S190300 [published Online First: 2020/10/30]  
14  
15 45. Tiwari A, Dandel S, Djupuri R, et al. Population-wide administration of single dose rifampicin for  
16 leprosy prevention in isolated communities: a three year follow-up feasibility study in  
17 Indonesia. *BMC Infect Dis* 2018;18(1):324. doi: 10.1186/s12879-018-3233-3 [published  
18 Online First: 2018/07/13]  
19  
20 46. Alsdurf H, Hill PC, Matteelli A, et al. The cascade of care in diagnosis and treatment of latent  
21 tuberculosis infection: a systematic review and meta-analysis. *Lancet Infect Dis*  
22 2016;16(11):1269-78. doi: 10.1016/s1473-3099(16)30216-x [published Online First:  
23 2016/10/30]  
24  
25 47. Shanaube K, Sismanidis C, Ayles H, et al. Annual risk of tuberculous infection using different  
26 methods in communities with a high prevalence of TB and HIV in Zambia and South Africa.  
27 *PLoS One* 2009;4(11):e7749. doi: 10.1371/journal.pone.0007749 [published Online First:  
28 2009/11/17]  
29  
30 48. Faul F, Erdfelder E, Buchner A, et al. Statistical power analyses using G\* Power 3.1: Tests for  
31 correlation and regression analyses. *Behavior research methods* 2009;41(4):1149-60.  
32  
33 49. Office DoNEP. Kiribati Development Plan 2016-19. [www.kiribati.gov.ki](http://www.kiribati.gov.ki): Government of Kiribati,  
34 2016.  
35  
36 50. WHO. Regional Framework for Action on Implementation of the End TB Strategy in the Western  
37 Pacific. In: Pacific MWROftW, ed. <http://iris.wpro.who.int/handle/10665.1/13131>, 2016.  
38  
39 51. Viney K LC, Morishita F, Rahevar K, Islam T, Oh KH, Marais BJ. A critical evaluation of the  
40 'Regional Framework for Action on Implementation of the End TB Strategy in the Western  
41 Pacific Region, 2016-2020. *WHO Bull* 2020;In press  
42  
43  
44  
45  
46  
47  
48  
49  
50  
51  
52  
53  
54  
55  
56  
57  
58  
59  
60

- 1  
2  
3 52. Mohr-Holland E, Douglas-Jones B, Apolisi I, et al. Tuberculosis preventive therapy for children  
4  
5 and adolescents: an emergency response to the COVID-19 pandemic. *Lancet Child Adolesc*  
6  
7 *Health* 2021;5(3):159-61. doi: 10.1016/s2352-4642(21)00003-1 [published Online First:  
8  
9 2021/02/21]
- 10  
11 53. Brostrom R, A Lagen, M Konelios-Langinlur, Z Zacharias, S Yadav, E Ko, J Dugan, J Hill, A  
12  
13 Finlay, and J Mermin. OA-14-409-01 Voyage to TB Elimination: A Mass TB Treatment and  
14  
15 Prevention Campaign in the Marshall Islands. 50th World Conference on Lung Health of the  
16  
17 International Union Against Tuberculosis and Lung Disease (The Union). Hyderabad:  
18  
19 International Union Against Tuberculosis and Lung Disease, 2019.
- 20  
21  
22  
23  
24  
25  
26  
27  
28  
29  
30  
31  
32  
33  
34  
35  
36  
37  
38  
39  
40  
41  
42  
43  
44  
45  
46  
47  
48  
49  
50  
51  
52  
53  
54  
55  
56  
57  
58  
59  
60

**Table 1. Study inclusion and exclusion criteria**

| <b>Inclusion</b>                                                                                                                                                                                                                                              | <b>Exclusion</b>                                                       |
|---------------------------------------------------------------------------------------------------------------------------------------------------------------------------------------------------------------------------------------------------------------|------------------------------------------------------------------------|
| <ul style="list-style-type: none"><li>• Everyone aged <math>\geq 3</math> years</li><li>• Children aged <math>&lt; 3</math> yrs who have had household contact with someone with TB in the past 12 months, or with someone with leprosy since birth</li></ul> | <ul style="list-style-type: none"><li>• Refuse participation</li></ul> |

For peer review only

Table 2. TB preventive treatment eligibility and hepatotoxicity risk classification

| Assessment                                                                                                                                                                                                                                            | Hepatotoxicity risk category                                                                                                                                    |                 |                                   |                                                     |
|-------------------------------------------------------------------------------------------------------------------------------------------------------------------------------------------------------------------------------------------------------|-----------------------------------------------------------------------------------------------------------------------------------------------------------------|-----------------|-----------------------------------|-----------------------------------------------------|
|                                                                                                                                                                                                                                                       | Low                                                                                                                                                             | Moderate        | Moderate high                     | High                                                |
| <b>Definition</b>                                                                                                                                                                                                                                     |                                                                                                                                                                 |                 |                                   |                                                     |
| <b>Risk factors</b><br><ul style="list-style-type: none"> <li>• Known viral hepatitis</li> <li>• Known HIV infection</li> <li>• Chronic liver disease</li> <li>• Alcohol/kava use*</li> <li>• Age ≥60 years</li> <li>• Test HBV positive**</li> </ul> | No risk factors present                                                                                                                                         | Any risk factor | Any risk factor                   | Any risk factor                                     |
| <b>ALT baseline test result</b><br>(if any risk factors)                                                                                                                                                                                              | Not done                                                                                                                                                        | ALT <2x ULN     | ALT 2-3x ULN and bilirubin <2xULN | ALT ≥3x ULN (or ALT 2-3x ULN and bilirubin ≥2x ULN) |
| <b>Management</b>                                                                                                                                                                                                                                     |                                                                                                                                                                 |                 |                                   |                                                     |
| <b>Monitoring while on TPT##</b>                                                                                                                                                                                                                      | No repeat ALT                                                                                                                                                   | No repeat ALT   | Repeat ALT after 3-4 weeks        | Not applicable                                      |
| <b>Eligibility for TPT</b>                                                                                                                                                                                                                            | <b>YES</b>                                                                                                                                                      | <b>YES</b>      | <b>YES</b>                        | <b>NO</b>                                           |
| <b>Other reasons for TPT ineligibility</b>                                                                                                                                                                                                            | <ul style="list-style-type: none"> <li>• Diagnosed with TB disease</li> <li>• TPT refused</li> <li>• Pregnancy</li> <li>• Allergies to TPT medicines</li> </ul> |                 |                                   |                                                     |

ALT - alanine aminotransferase; HBV - hepatitis B virus; HIV - human immunodeficiency virus; TB – tuberculosis; TPT - TB preventive treatment; ULN - upper limit of normal

\*'Excessive use' defined as ≥3 days/week and/or (for alcohol) getting drunk every week

\*\*Everyone ≥40 years with a positive TST who agrees to TPT and is otherwise at low risk is tested with an HBV rapid antigen test

## Everyone on TPT receives adherence and adverse event counselling, a TPT passport (supplements S4 and S5), as well as access to community-based treatment monitoring and adherence support

**Table 3: Criteria for TB preventive treatment completion**

| <b><u>Regimen</u></b> | <b>Expected duration</b> | <b>Expected total doses</b> | <b>Minimum doses for completion</b> | <b>Maximum time for completion</b> | <b>TPT incomplete</b>    |
|-----------------------|--------------------------|-----------------------------|-------------------------------------|------------------------------------|--------------------------|
| <b>3HP</b> (weekly)   | 12 weeks                 | 12                          | 11                                  | 16 weeks                           | <8 doses after 12 weeks  |
| <b>3RH</b> (daily)    | 3 months                 | 84                          | 68                                  | 4 months                           | <40 doses after 3 months |
| <b>4R</b> (daily)     | 4 months                 | 120                         | 96                                  | 5 months                           | <68 doses after 4 months |

H - isoniazid; P - rifapentine; R - rifampicin; TB - tuberculosis; TPT - TB preventive treatment

1  
2  
3 **Table 4. Contraindications to single dose rifampicin (SDR)**  
4

- |                                                                                                                                                                                                                                                 |
|-------------------------------------------------------------------------------------------------------------------------------------------------------------------------------------------------------------------------------------------------|
| <ul style="list-style-type: none"><li>5 • History of liver or kidney disease</li><li>6 • Known pregnancy</li><li>7 • Known allergy to rifampicin</li><li>8 • Signs and/or symptoms of leprosy</li><li>9 • Signs and/or symptoms of TB</li></ul> |
|-------------------------------------------------------------------------------------------------------------------------------------------------------------------------------------------------------------------------------------------------|
- 10  
11  
12  
13  
14  
15  
16  
17  
18  
19  
20  
21  
22  
23  
24  
25  
26  
27  
28  
29  
30  
31  
32  
33  
34  
35  
36  
37  
38  
39  
40  
41  
42  
43  
44  
45  
46  
47  
48  
49  
50  
51  
52  
53  
54  
55  
56  
57  
58  
59  
60

For peer review only



1  
2  
3 **Figure 1. Overview of study enrolment and population-wide TB and leprosy screening**  
4 **approach**  
5  
6  
7  
8  
9

10 HH - household; LTBI - latent TB infection; LPT - leprosy preventive therapy; NTP - Kiribati National TB  
11 Control Programme; TB - tuberculosis; TST - tuberculin skin test; TPT - TB preventive treatment; yrs -  
12 years; 3HP - 12 once-weekly doses of isoniazid and rifapentine; 3RH - 3 months of daily isoniazid and  
13 rifampicin.

14 \*Chest X-ray to be performed in everyone  $\geq 10$  yrs of age and all children  $< 10$  yrs with current symptoms  
15 (cough, fever, weight loss/failure to thrive or visible neck nodes).

16 \*\*The TST can be read up to 96 hours (4 days) after placement if the 2-day follow-up is missed.  
17  
18  
19  
20  
21  
22  
23  
24  
25  
26  
27  
28  
29  
30  
31  
32  
33  
34  
35  
36  
37  
38  
39  
40  
41  
42  
43  
44  
45  
46  
47  
48  
49  
50  
51  
52  
53  
54  
55  
56  
57  
58  
59  
60

For peer review only

1  
2  
3 **Figure 2. Overview of study governance**  
4  
5  
6  
7

8 PEARL - Pathway to the Elimination of Antibiotic Resistant and Latent tuberculosis in the Pacific; NTP  
9 - National TB program; NLP - Leprosy program in the NTP; MHMS - Ministry of Health and Medical  
10 Services  
11  
12  
13  
14  
15  
16  
17  
18  
19  
20  
21  
22  
23  
24  
25  
26  
27  
28  
29  
30  
31  
32  
33  
34  
35  
36  
37  
38  
39  
40  
41  
42  
43  
44  
45  
46  
47  
48  
49  
50  
51  
52  
53  
54  
55  
56  
57  
58  
59  
60

For peer review only

1  
2  
3  
4  
5  
6  
7  
8  
9  
10  
11  
12  
13  
14  
15  
16  
17  
18  
19  
20  
21  
22  
23  
24  
25  
26  
27  
28  
29  
30  
31  
32  
33  
34  
35  
36  
37  
38  
39  
40  
41  
42  
43  
44  
45  
46  
47  
48  
49  
50  
51  
52  
53  
54  
55  
56  
57  
58  
59  
60

For peer review only

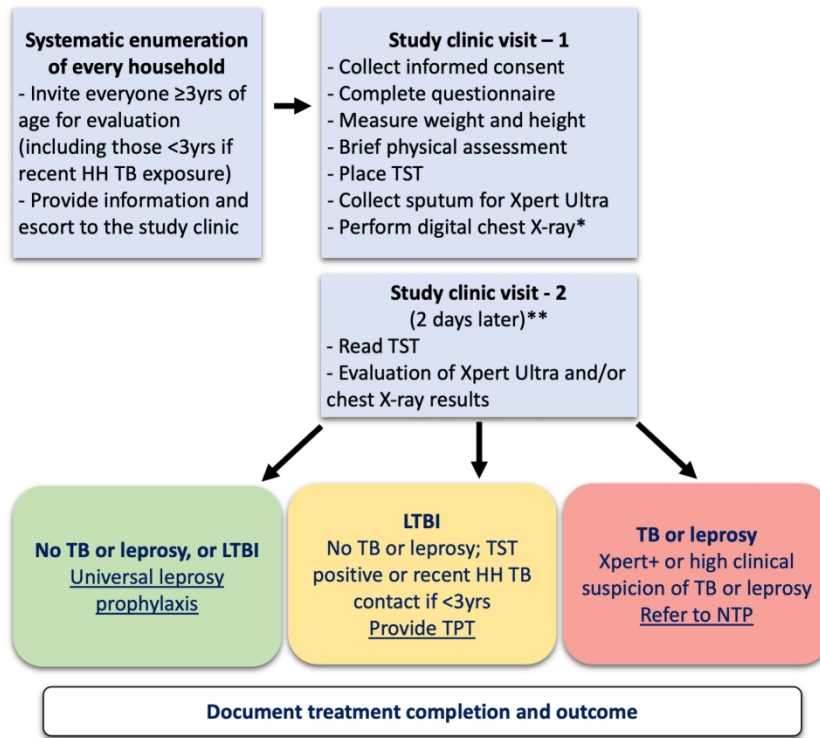

Figure 1. Overview of study enrolment and population-wide TB and leprosy screening approach

HH - household; LTBI - latent TB infection; LPT - leprosy preventive therapy; NTP - Kiribati National TB Control Programme; TB - tuberculosis; TST - tuberculin skin test; TPT - TB preventive treatment; yrs - years; 3HP - 12 once-weekly doses of isoniazid and rifampentine; 3RH - 3 months of daily isoniazid and rifampicin.

\*Chest X-ray to be performed in everyone  $\geq 10$  yrs of age and all children  $< 10$  yrs with current symptoms (cough, fever, weight loss/failure to thrive or visible neck nodes).

\*\*The TST can be read up to 96 hours (4 days) after placement if the 2-day follow-up is missed.

190x190mm (300 x 300 DPI)

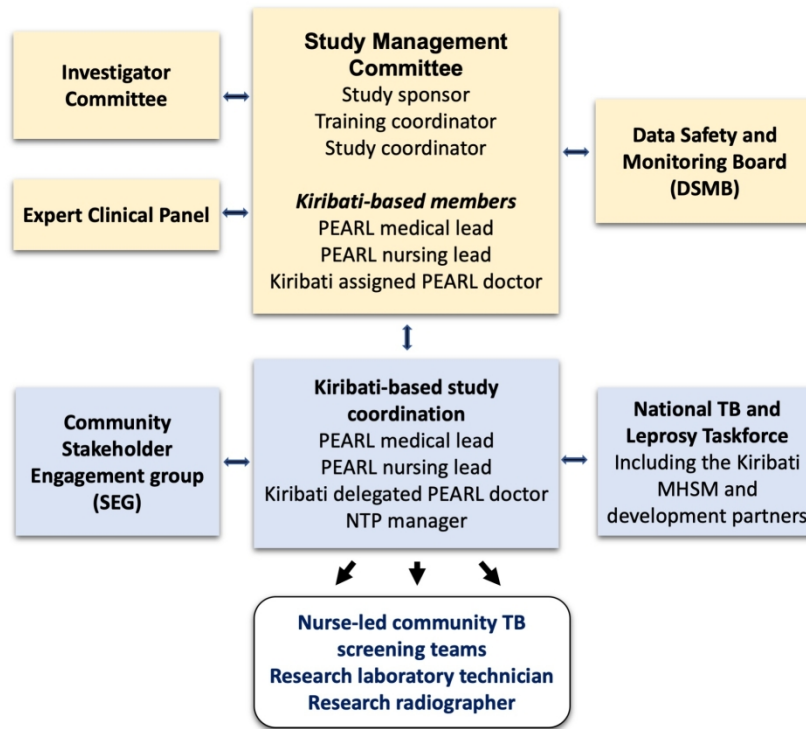

Figure 2. Overview of study governance

PEARL - Pathway to the Elimination of Antibiotic Resistant and Latent tuberculosis in the Pacific; NTP - National TB program; NLP - Leprosy program in the NTP; MHMS - Ministry of Health and Medical Services

190x190mm (300 x 300 DPI)

Supplementary Material

Figure S1. PEARL TB and leprosy screening algorithm

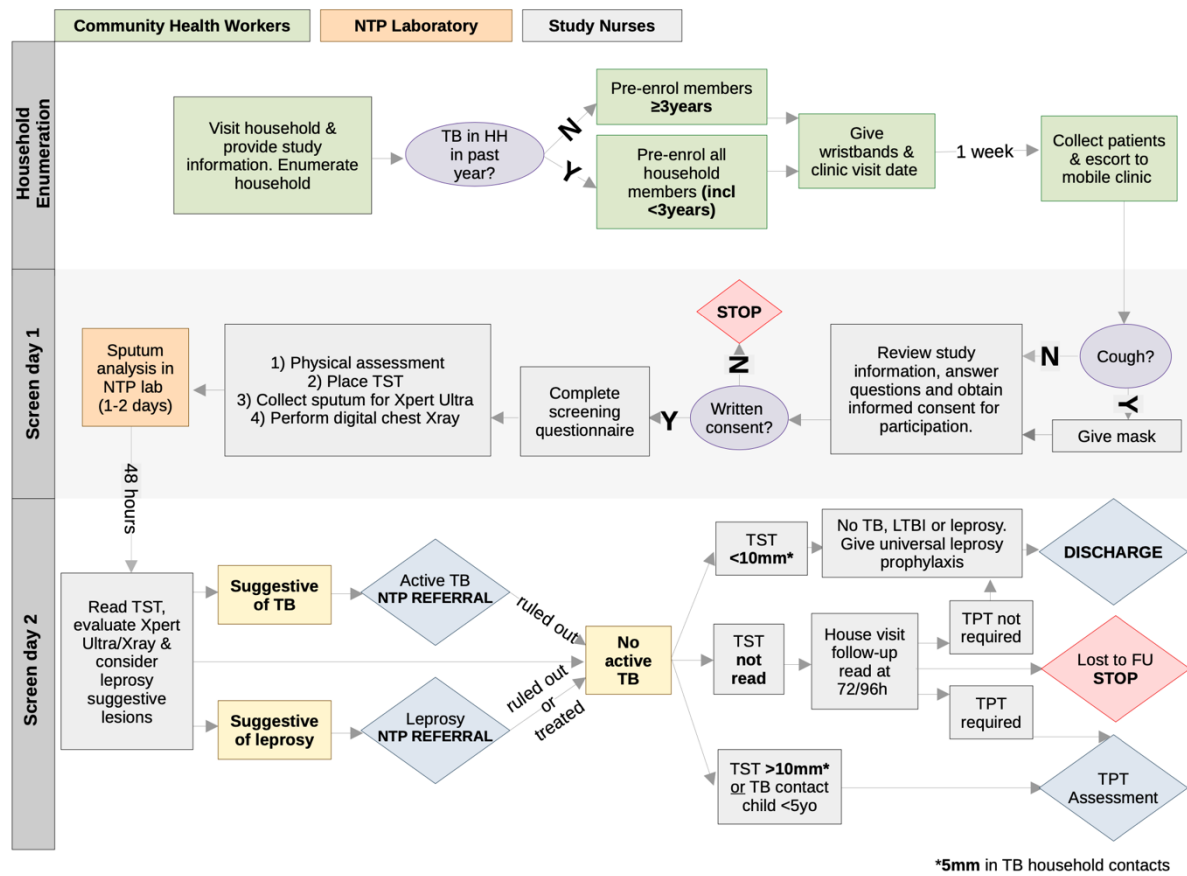

\*5mm in TB household contacts

FU – follow-up; HH - household; LTBI - latent TB infection; N - no; NTP - National TB Program; TB - tuberculosis; TPT - TB Preventive Treatment; TST - Tuberculin Skin Test; Y - yes

Figure S2. TB preventive Therapy (TPT) algorithm

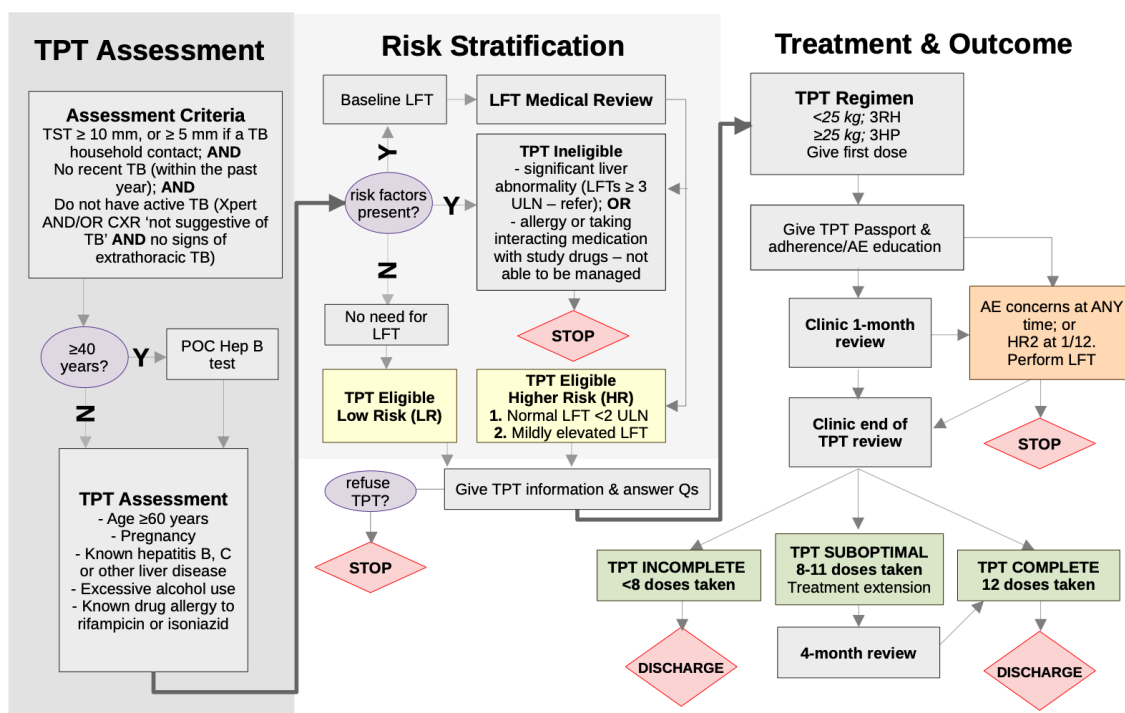

3HP - 3-months weekly rifapentine and isoniazid; 3RH - 3-months daily rifampicin and isoniazid; AE - adverse event; CXR - chest X-ray; FU - follow-up; HR2 - higher risk group 2; LFT - liver function test; LTBI - latent TB infection; NTP - National TB Program; POC - point-of-care; TB - Tuberculosis; TPT - TB Preventive Treatment; TST - Tuberculin Skin Test; ULN - upper limit of normal

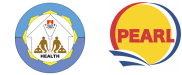

### S3. Participant Information Form

## PEARL PARTICIPANT INFORMATION

### Finding and preventing TB and leprosy in Tarawa

#### Dear participant,

We would like to invite you (and your child if relevant) to be evaluated for TB and leprosy, with treatment to be provided as appropriate. This document provides information about the intervention, but we will also explain things in person.

Please read this Participant Information sheet carefully and ask questions about anything that you don't understand or want to know more about. You may refuse participation and this will not be held against you or affect any future access to healthcare.

#### What is this intervention about?

TB is a disease caused by germs that are coughed into the air by someone who is ill with TB. Most people who are infected with the TB germ do not become ill and do not even know that they are infected, this is referred to as latent or 'sleeping' TB. **Sometimes sleeping TB can wake up and make you ill, which may also spread the germ to others.** This intervention aims to eliminate TB from Tarawa by identifying and treating all people with TB and those with sleeping TB who may become ill in future. At the same time we are also trying to eliminate leprosy, by treating people with leprosy and preventing leprosy in others.

#### Who is doing this?

The study is carried out by researchers at the University of Sydney, Australia, in close collaboration with the Kiribati Ministry of Health and Medical Services (MHMS). The study is funded by the Australian Medical Research Future Fund and fully supported by the Kiribati government.

#### What will happen?

This study involves screening for TB (both 'sleeping TB' and TB disease) and leprosy. Screening will include looking at your skin, doing a TB skin test, having a chest X-ray and providing a sputum sample. People who are ill with TB or leprosy will be referred to the TB and Leprosy Programme for appropriate treatment. People with 'sleeping TB' will be offered TB preventive treatment (TPT) and those without any illness or TB infection will be offered leprosy prophylaxis.

People diagnosed with sleeping TB (this is common and is expected in 20-30% of people) will be offered treatment for sleeping TB. Treatment is for three months and is usually safe, but we will have to perform a few checks. A study nurse will ask some personal questions, including questions about previous and current illnesses, medications used, drinking of alcohol or kava, and questions about pregnancy if you are a woman. People between 40-59 years of age will be given a finger prick to test for hepatitis B infection. Those with hepatitis B infection or any other risk factors for TB treatment will need to have a small amount of blood drawn to make sure their liver function stays healthy during the time that they are treated for sleeping TB.

#### How much of my time will it take?

We will try to waste as little of your time as possible. To complete the TB and leprosy screening will require you (and your whole household) to be seen on two separate days. This is to complete all the necessary documentation and tests. It is expected that this will take about 2-3 hours of your time on each of these days. Those diagnosed with sleeping TB will need to take tablets once a week for 12 weeks (or daily for 3 months in children). Tablets will be given out at the mobile health clinic and are free of charge.



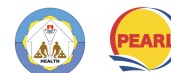

## Who can take part?

Every person older than 3 years of age living in Tarawa and Betio islet is invited to take part. People younger than 3 years of age who live in a house that shares a kitchen with someone who has had TB or leprosy in the past 12 months are also invited to take part.

## Do I have to be in the study? Can I withdraw from the study once I've started?

Taking part in this study is strongly recommended to help us get rid of TB and leprosy across Tarawa. However, participation is completely voluntary and you do not have to take part. Your decision will not affect your current or future relationship with the researchers, or the Kiribati Ministry of Health and Medical Services (MHMS).

If you decide to take part in the study and then change your mind later, you are free to withdraw at any time. You can do this by visiting the study clinic and speaking with a study nurse or doctor who will ask you some questions and give you advice on how to stay healthy from TB in the future.

If you decide to withdraw from the study, we will not collect any further information from you. Information that we have already collected will be kept in our study records and may be included in the study results.

## Are there any costs or risks?

All tests and treatment are provided free of charge and study clinics will be conveniently situated to be easily accessible.

If treatment for 'sleeping TB' is provided it is normal to feel a bit tired and to have bright orange urine while you are taking the tablets. Rarely people may develop more serious symptoms that mainly affects the liver, which is why we do the additional testing described above. We will explain all of this to you in detail before providing you with any treatment.

## What are the benefits?

There are major benefits to yourself and the wider community

- You (and your child) will get treatment for TB or leprosy – if required
- You (and your child) will get treatment for sleeping TB (TPT) – if required
- You (and your child) will get treatment to help keep leprosy away
- You will help to eliminate TB and leprosy from Tarawa
- You will help other Pacific Island nations to learn from Tarawa

## Is my data safe?

Medical information will be kept in private MHMS medical records or with the PEARL team. Data collected during the intervention will only be shared with the Kiribati MHMS as relevant and will otherwise be kept confidential. The information may be included in reports and publications, but your name and personal information will never be shared.

## Where can I get further information about the intervention?

Further information about the study can be found on our website [www.thepearlstudy.org](http://www.thepearlstudy.org) or by speaking to any of the study personnel.

## Will I be informed about the results?



The results of the study will be reported to the MHMS and shared with the residents of Tarawa by radio announcement and other means, it will also be accessible on the website [www.thepearlstudy.org](http://www.thepearlstudy.org).

### What if I have a complaint or any concerns about the study?

This research has been reviewed and approved by an independent group of people called a Human Research Ethics Committee (HREC) at the University of Sydney and the Kiribati Ministry of Health and Medical Services.

If you are concerned about the way this study is being conducted please inform the study team; we want to learn and hear how we can improve things. If you wish to make a complaint to someone independent then please contact any of the people listed below.

Terotia Tabwaka Kelese, Human Resource Officer, Republic of Kiribati  
**Email:** [ttabwaka@gmail.com](mailto:ttabwaka@gmail.com)

or

The Manager, Ethics Administration, University of Sydney:  
**Telephone:** +61 2 8627 8176  
**Email:** [human.ethics@sydney.edu.au](mailto:human.ethics@sydney.edu.au)  
**Fax:** +61 2 8627 8177 (Facsimile)

### WE THANK YOU FOR YOUR TIME AND COOPERATION.

The PEARL Research Team with the support of the Kiribati National TB and Leprosy Control Programmes

### On behalf of the Kiribati Ministry of Health and Medical Services

.....  
Eretii Timeon  
Director of Public Health

S4. 3HP TB Preventive Treatment (TPT) Passport

**3HP**

# TPT Passport

Name: \_\_\_\_\_

Start date: \_\_\_\_/\_\_\_\_/\_\_\_\_

Dose:  3 tablets  2 tablets

Schedule: *Take once per week on the same day*

Record ID

**12 doses to treat sleeping TB**

Take your tablets **with water** - never with alcohol

Take your tablets on the **same day** every week

|                              | Sunday                   | Monday                   | Tuesday                  | Wednesday                | Thursday                 | Friday                   | Saturday                 |
|------------------------------|--------------------------|--------------------------|--------------------------|--------------------------|--------------------------|--------------------------|--------------------------|
| week 1                       | <input type="checkbox"/> |
| week 2                       | <input type="checkbox"/> |
| week 3                       | <input type="checkbox"/> |
| week 4                       | <input type="checkbox"/> |
| 4-week visit: ____/____/____ |                          |                          |                          |                          |                          |                          |                          |
| week 5                       | <input type="checkbox"/> |
| week 6                       | <input type="checkbox"/> |
| week 7                       | <input type="checkbox"/> |
| week 8                       | <input type="checkbox"/> |
| 8-week visit: ____/____/____ |                          |                          |                          |                          |                          |                          |                          |

Treatment Completion Date: \_\_\_\_\_

**Missed a day?** Take your tablets as soon as you remember

Store your tablets **out of the sun** and out of reach from children

|                               | Sunday                   | Monday                   | Tuesday                  | Wednesday                | Thursday                 | Friday                   | Saturday                 |
|-------------------------------|--------------------------|--------------------------|--------------------------|--------------------------|--------------------------|--------------------------|--------------------------|
| week 9                        | <input type="checkbox"/> |
| week 10                       | <input type="checkbox"/> |
| week 11                       | <input type="checkbox"/> |
| week 12                       | <input type="checkbox"/> |
| 12-week visit: ____/____/____ |                          |                          |                          |                          |                          |                          |                          |
| week 13                       | <input type="checkbox"/> |
| week 14                       | <input type="checkbox"/> |
| week 15                       | <input type="checkbox"/> |
| week 16                       | <input type="checkbox"/> |
| 16-week visit: ____/____/____ |                          |                          |                          |                          |                          |                          |                          |

PEARL staff sign: \_\_\_\_\_

Stamp

## Things to look out for

**NORMAL AND HARMLESS**

Bright orange urine, sweat or tears

**GET HELP IF THIS DOES NOT GO AWAY**

headache or sore throat      dizzy or light-headed

**STOP MEDICINE AND GET HELP**

yellowing eyes or skin      nausea, vomiting, stomach pain      unusual tiredness      loss of appetite

## How to get help

Contact a CHOW in your community  
Call the PEARL helpline - XXX XXX XXX  
Visit a screening clinic to see a nurse  
If very unwell - go to the hospital

S5. 3RH TB Preventive Treatment (TPT) Passport

**3RH**

# TPT Passport

Name: \_\_\_\_\_

Start date: \_\_\_\_/\_\_\_\_/\_\_\_\_

Dose:  3 tablets  2 tablets

*Take once per day every day*

**3 months to treat sleeping TB**

Mix tablets **with water** - check they drink every drop!

Give tablets **every day** for 3 months

|                              | Sunday                   | Monday                   | Tuesday                  | Wednesday                | Thursday                 | Friday                   | Saturday                 |
|------------------------------|--------------------------|--------------------------|--------------------------|--------------------------|--------------------------|--------------------------|--------------------------|
| week 1                       | <input type="checkbox"/> |
| week 2                       | <input type="checkbox"/> |
| week 3                       | <input type="checkbox"/> |
| week 4                       | <input type="checkbox"/> |
| 4-week visit: ____/____/____ |                          |                          |                          |                          |                          |                          |                          |
| week 5                       | <input type="checkbox"/> |
| week 6                       | <input type="checkbox"/> |
| week 7                       | <input type="checkbox"/> |
| week 8                       | <input type="checkbox"/> |
| 8-week visit: ____/____/____ |                          |                          |                          |                          |                          |                          |                          |

**Missed a day?** Keep giving tablets **every day** until finished

Store tablets **out of the sun** and out of reach from children

|                               | Sunday                   | Monday                   | Tuesday                  | Wednesday                | Thursday                 | Friday                   | Saturday                 |
|-------------------------------|--------------------------|--------------------------|--------------------------|--------------------------|--------------------------|--------------------------|--------------------------|
| week 9                        | <input type="checkbox"/> |
| week 10                       | <input type="checkbox"/> |
| week 11                       | <input type="checkbox"/> |
| week 12                       | <input type="checkbox"/> |
| 12-week visit: ____/____/____ |                          |                          |                          |                          |                          |                          |                          |
| week 13                       | <input type="checkbox"/> |
| week 14                       | <input type="checkbox"/> |
| week 15                       | <input type="checkbox"/> |
| week 16                       | <input type="checkbox"/> |
| 16-week visit: ____/____/____ |                          |                          |                          |                          |                          |                          |                          |

## Things to look out for in kids

**NORMAL AND HARMLESS**

Bright orange urine, sweat, tears or nappies

**GET HELP IF THIS DOES NOT GO AWAY**

nausea, vomiting, stomach pain    unusual tiredness    loss of appetite

**STOP MEDICINE AND GET HELP**

yellowing eyes or skin    face or body rash

## How to get help

Contact a CHOW in your community  
 Call the PEARL helpline - XXX XXX XXX  
 Visit a screening clinic to see a nurse  
 If very unwell - go to the hospital

## Estimated alpha for effect on TB and leprosy case notifications

For study outcomes measures relating to the case notification rate (CNR) before and after the intervention, the sample size is the entire population of South Tarawa and the outcome is measured programmatically through routine service delivery. The population of South Tarawa is estimated to be 65,566 in 2021 and 71,091 in 2025 (Kiribati NSO, SPC SDD). TB CNR was 0.42% for South Tarawa in 2020 (Kiribati NTP, unpublished, November 2021) and 0.16% for leprosy (Pacific Leprosy Foundation, unpublished, November 2021). Population wide active case finding and prevention interventions for TB have achieved a reduction in case notification rate of approximately 50% in Vietnam and the Republic of the Marshall Islands (Marks et al, NEJM, 2019; RMI MoHHS and USCDC, unpublished, 2021). In Indonesia, impact on case notifications was also approximately 50% among participants in a population wide screening and prevention project (Tiwari et al, BMC ID, 2018). Using a two-tailed z-test to approximate Poisson regression in a large sample and with power of 0.8, the estimated alpha for an anticipated reduction in CNR by 50% is  $<0.001$  for TB and leprosy. The estimated alpha is plotted for a range of effect sizes in Figures S1 and S2, which demonstrates adequacy of the sample/population size. Although the study is sufficiently powered to demonstrate a major short-term reduction in CNR, we will interpret the results with due consideration for the overall goals of achieving a durable public health impact and with careful consideration of the limitations in attribution inherent in a quasi-experimental analysis.

**Figure S6.** Estimated alpha as a function of post-intervention TB case notification rates (expressed as a proportion of the population), with pre-intervention population of 65,566 and post-intervention population of 71,091; baseline case notification rate of 0.42% (420/100,000 population) and power of 0.8.

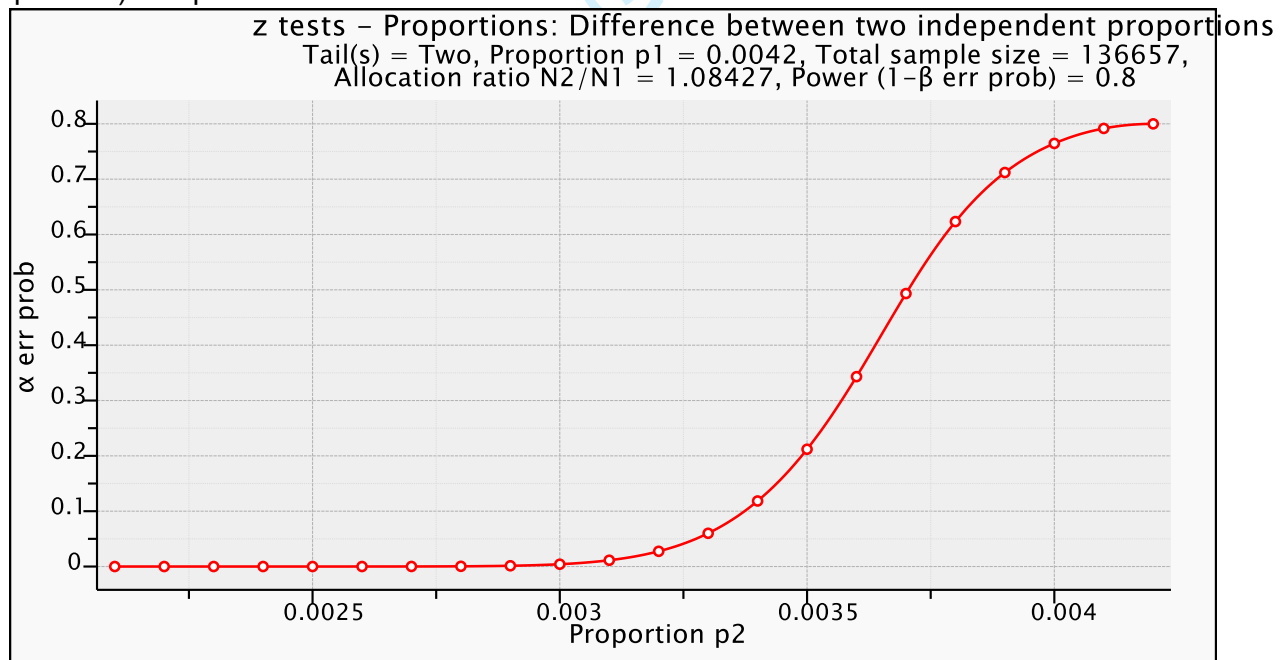

**Figure S7.** Estimated alpha as a function of post-intervention TB case notification rates (expressed as a proportion of the population), with pre-intervention population of 65,566 and post-intervention population of 71,091; baseline case notification rate of 0.16% (160/100,000 population) and power of 0.8.

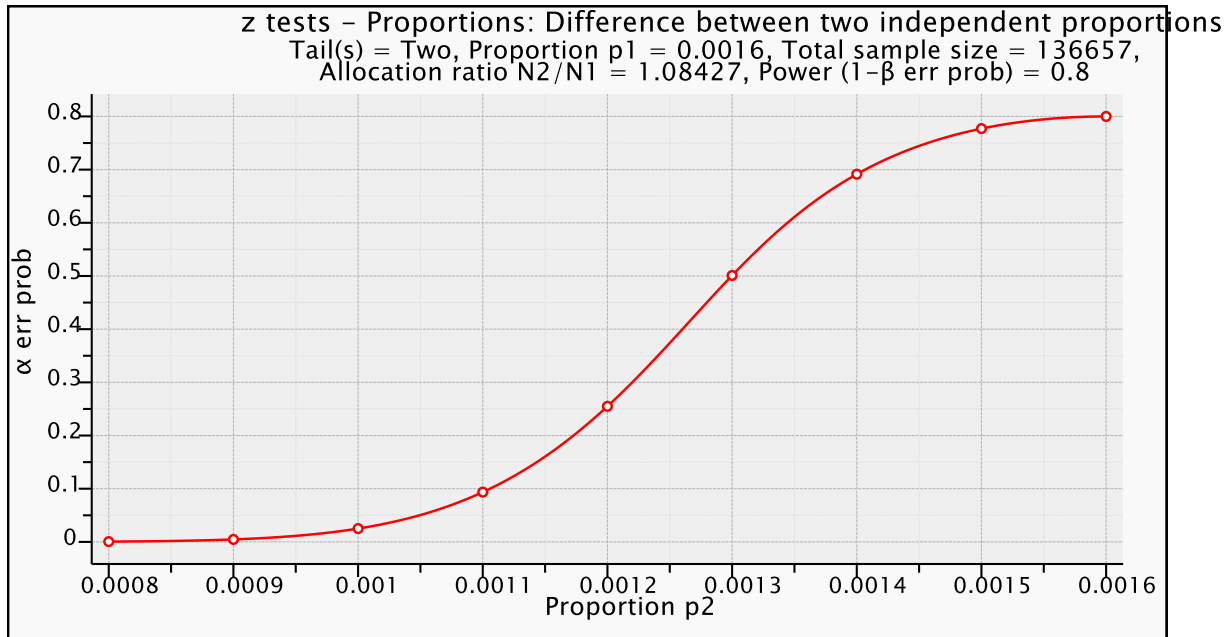

## S8. Informed Consent Form

**INFORMED CONSENT PROCESS FORM**

**Date of informed consent**  
/Date of informed consent   Today D-M-Y  
*\* must provide value*

**Does the participant have capacity to consent?**  
*\* must provide value*

Yes  
 No - young person < 18 years of age  
 No - disability  
 No - other reason

[reset](#)

**Name of Consenting Guardian**  
*\* must provide value*

**Relationship of consenting guardian**  
*\* must provide value*

parent  
 spouse  
 grandparent  
 aunt/uncle  
 sibling  
 other relative  
 non-relative guardian

[reset](#)

**Does the participant assent to participate in the study?**  
*\* must provide value*

Yes  
 No

[reset](#)

**Does the participant/primary caregiver agree to participate in study?**  
*\* must provide value*

Yes  
 No

[reset](#)

**Can participant/caregiver read Kiribati?**  
*\* must provide value*

Yes  
 No

[reset](#)

**Can participant/caregiver read English?**  
*\* must provide value*

Yes  
 No

[reset](#)

**Participant information given and all participant questions answered?**  
*\* must provide value*

Yes  
 No

1  
2  
3  
4  
5  
6  
7  
8  
9  
10  
11  
12  
13  
14  
15  
16  
17  
18  
19  
20  
21  
22  
23  
24  
25  
26  
27  
28  
29  
30  
31  
32  
33  
34  
35  
36  
37  
38  
39  
40  
41  
42  
43  
44  
45  
46  
47  
48  
49  
50  
51  
52  
53  
54  
55  
56  
57  
58  
59  
60

[reset](#)

**Participant is aware that this is a public health intervention endorsed and supported by the Kiribati Ministry of Health and Medical Services?**

**\* must provide value**

Yes  
 No

[reset](#)

**Participant is aware that screen may involve providing sputum or blood samples?**

**\* must provide value**

1. Yes/ Yes  
 0. No/ No

[reset](#)

**Date & Time Participant/caregiver signed Written Consent Form**

**\* must provide value**

  D-M-Y H:M

**Sign**

**\* must provide value**

[Add signature](#)

**Other comments**

review only



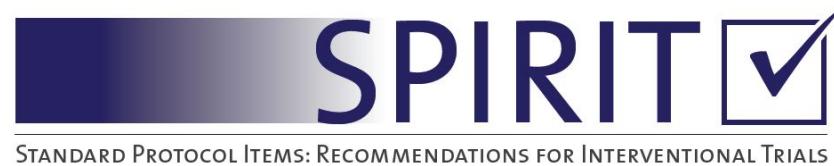

## Population-wide active case finding and prevention for tuberculosis and leprosy elimination in Kiribati – the PEARL study protocol

SPIRIT 2013 Checklist: Recommended items to address in a clinical trial protocol and related documents\*

| Section/item                      | Item No | Description                                                                                                                                                                                                                                                                              | Addressed on page number |
|-----------------------------------|---------|------------------------------------------------------------------------------------------------------------------------------------------------------------------------------------------------------------------------------------------------------------------------------------------|--------------------------|
| <b>Administrative information</b> |         |                                                                                                                                                                                                                                                                                          |                          |
| Title                             | 1       | Descriptive title identifying the study design, population, interventions, and, if applicable, trial acronym                                                                                                                                                                             | ___1___                  |
| Trial registration                | 2a      | Trial identifier and registry name. If not yet registered, name of intended registry                                                                                                                                                                                                     | NA not a trial           |
|                                   | 2b      | All items from the World Health Organization Trial Registration Data Set                                                                                                                                                                                                                 | NA not a trial           |
| Protocol version                  | 3       | Date and version identifier                                                                                                                                                                                                                                                              | ___3___                  |
| Funding                           | 4       | Sources and types of financial, material, and other support                                                                                                                                                                                                                              | ___20___                 |
| Roles and responsibilities        | 5a      | Names, affiliations, and roles of protocol contributors                                                                                                                                                                                                                                  | ___1-2; 20___            |
|                                   | 5b      | Name and contact information for the trial sponsor                                                                                                                                                                                                                                       | ___20___                 |
|                                   | 5c      | Role of study sponsor and funders, if any, in study design; collection, management, analysis, and interpretation of data; writing of the report; and the decision to submit the report for publication, including whether they will have ultimate authority over any of these activities | ___20___                 |
|                                   | 5d      | Composition, roles, and responsibilities of the coordinating centre, steering committee, endpoint adjudication committee, data management team, and other individuals or groups overseeing the trial, if applicable (see Item 21a for data monitoring committee)                         | ___14-17___              |

|    |                                                           |     |                                                                                                               |                         |
|----|-----------------------------------------------------------|-----|---------------------------------------------------------------------------------------------------------------|-------------------------|
| 1  | <b>Introduction</b>                                       |     |                                                                                                               |                         |
| 2  |                                                           |     |                                                                                                               |                         |
| 3  | Background and                                            | 6a  | Description of research question and justification for undertaking the trial, including summary of relevant   | <u>5-6</u>              |
| 4  | rationale                                                 |     | studies (published and unpublished) examining benefits and harms for each intervention                        |                         |
| 5  |                                                           |     |                                                                                                               |                         |
| 6  |                                                           | 6b  | Explanation for choice of comparators                                                                         | <u>5-6</u>              |
| 7  |                                                           |     |                                                                                                               |                         |
| 8  | Objectives                                                | 7   | Specific objectives or hypotheses                                                                             | <u>5-6</u>              |
| 9  |                                                           |     |                                                                                                               |                         |
| 10 | Trial design                                              | 8   | Description of trial design including type of trial (eg, parallel group, crossover, factorial, single group), |                         |
| 11 |                                                           |     | allocation ratio, and framework (eg, superiority, equivalence, noninferiority, exploratory)                   | <u>6</u>                |
| 12 |                                                           |     |                                                                                                               |                         |
| 13 |                                                           |     |                                                                                                               |                         |
| 14 | <b>Methods: Participants, interventions, and outcomes</b> |     |                                                                                                               |                         |
| 15 |                                                           |     |                                                                                                               |                         |
| 16 | Study setting                                             | 9   | Description of study settings (eg, community clinic, academic hospital) and list of countries where data will | <u>6-7</u>              |
| 17 |                                                           |     | be collected. Reference to where list of study sites can be obtained                                          |                         |
| 18 |                                                           |     |                                                                                                               |                         |
| 19 | Eligibility criteria                                      | 10  | Inclusion and exclusion criteria for participants. If applicable, eligibility criteria for study centres and  | <u>8; table 1</u>       |
| 20 |                                                           |     | individuals who will perform the interventions (eg, surgeons, psychotherapists)                               |                         |
| 21 |                                                           |     |                                                                                                               |                         |
| 22 | Interventions                                             | 11a | Interventions for each group with sufficient detail to allow replication, including how and when they will be | <u>8-13</u>             |
| 23 |                                                           |     | administered                                                                                                  |                         |
| 24 |                                                           |     |                                                                                                               |                         |
| 25 |                                                           | 11b | Criteria for discontinuing or modifying allocated interventions for a given trial participant (eg, drug dose  | <u>11-12; table 2,4</u> |
| 26 |                                                           |     | change in response to harms, participant request, or improving/worsening disease)                             |                         |
| 27 |                                                           |     |                                                                                                               |                         |
| 28 |                                                           | 11c | Strategies to improve adherence to intervention protocols, and any procedures for monitoring adherence        | <u>10-11</u>            |
| 29 |                                                           |     | (eg, drug tablet return, laboratory tests)                                                                    |                         |
| 30 |                                                           |     |                                                                                                               |                         |
| 31 |                                                           | 11d | Relevant concomitant care and interventions that are permitted or prohibited during the trial                 | <u>11-12</u>            |
| 32 |                                                           |     |                                                                                                               |                         |
| 33 | Outcomes                                                  | 12  | Primary, secondary, and other outcomes, including the specific measurement variable (eg, systolic blood       | <u>13-14</u>            |
| 34 |                                                           |     | pressure), analysis metric (eg, change from baseline, final value, time to event), method of aggregation (eg, |                         |
| 35 |                                                           |     | median, proportion), and time point for each outcome. Explanation of the clinical relevance of chosen         |                         |
| 36 |                                                           |     | efficacy and harm outcomes is strongly recommended                                                            |                         |
| 37 |                                                           |     |                                                                                                               |                         |
| 38 | Participant timeline                                      | 13  | Time schedule of enrolment, interventions (including any run-ins and washouts), assessments, and visits for   | <u>table 3; fig 1</u>   |
| 39 |                                                           |     | participants. A schematic diagram is highly recommended (see Figure)                                          |                         |
| 40 |                                                           |     |                                                                                                               |                         |
| 41 |                                                           |     |                                                                                                               |                         |
| 42 |                                                           |     |                                                                                                               |                         |
| 43 |                                                           |     |                                                                                                               |                         |
| 44 |                                                           |     |                                                                                                               |                         |
| 45 |                                                           |     |                                                                                                               |                         |
| 46 |                                                           |     |                                                                                                               |                         |

|   |             |    |                                                                                                                                                                                       |                              |
|---|-------------|----|---------------------------------------------------------------------------------------------------------------------------------------------------------------------------------------|------------------------------|
| 1 | Sample size | 14 | Estimated number of participants needed to achieve study objectives and how it was determined, including clinical and statistical assumptions supporting any sample size calculations | <a href="#">__14, S3-4__</a> |
| 2 |             |    |                                                                                                                                                                                       |                              |
| 3 |             |    |                                                                                                                                                                                       |                              |
| 4 | Recruitment | 15 | Strategies for achieving adequate participant enrolment to reach target sample size                                                                                                   | <a href="#">__8; 14__</a>    |
| 5 |             |    |                                                                                                                                                                                       |                              |

### 6 **Methods: Assignment of interventions (for controlled trials)**

#### 7 Allocation:

|    |                    |     |                                                                                                                                                                                                                                                                                                                                                          |                                    |
|----|--------------------|-----|----------------------------------------------------------------------------------------------------------------------------------------------------------------------------------------------------------------------------------------------------------------------------------------------------------------------------------------------------------|------------------------------------|
| 8  |                    |     |                                                                                                                                                                                                                                                                                                                                                          |                                    |
| 9  |                    |     |                                                                                                                                                                                                                                                                                                                                                          |                                    |
| 10 | Sequence           | 16a | Method of generating the allocation sequence (eg, computer-generated random numbers), and list of any factors for stratification. To reduce predictability of a random sequence, details of any planned restriction (eg, blocking) should be provided in a separate document that is unavailable to those who enrol participants or assign interventions | <a href="#">NA non-random</a>      |
| 11 | generation         |     |                                                                                                                                                                                                                                                                                                                                                          |                                    |
| 12 |                    |     |                                                                                                                                                                                                                                                                                                                                                          |                                    |
| 13 |                    |     |                                                                                                                                                                                                                                                                                                                                                          |                                    |
| 14 |                    |     |                                                                                                                                                                                                                                                                                                                                                          |                                    |
| 15 |                    |     |                                                                                                                                                                                                                                                                                                                                                          |                                    |
| 16 | Allocation         | 16b | Mechanism of implementing the allocation sequence (eg, central telephone; sequentially numbered, opaque, sealed envelopes), describing any steps to conceal the sequence until interventions are assigned                                                                                                                                                | <a href="#">NA population-wide</a> |
| 17 | concealment        |     |                                                                                                                                                                                                                                                                                                                                                          |                                    |
| 18 | mechanism          |     |                                                                                                                                                                                                                                                                                                                                                          |                                    |
| 19 |                    |     |                                                                                                                                                                                                                                                                                                                                                          |                                    |
| 20 | Implementation     | 16c | Who will generate the allocation sequence, who will enrol participants, and who will assign participants to interventions                                                                                                                                                                                                                                | <a href="#">NA population-wide</a> |
| 21 |                    |     |                                                                                                                                                                                                                                                                                                                                                          |                                    |
| 22 |                    |     |                                                                                                                                                                                                                                                                                                                                                          |                                    |
| 23 |                    |     |                                                                                                                                                                                                                                                                                                                                                          |                                    |
| 24 | Blinding (masking) | 17a | Who will be blinded after assignment to interventions (eg, trial participants, care providers, outcome assessors, data analysts), and how                                                                                                                                                                                                                | <a href="#">NA open-label</a>      |
| 25 |                    |     |                                                                                                                                                                                                                                                                                                                                                          |                                    |
| 26 |                    |     |                                                                                                                                                                                                                                                                                                                                                          |                                    |
| 27 |                    | 17b | If blinded, circumstances under which unblinding is permissible, and procedure for revealing a participant's allocated intervention during the trial                                                                                                                                                                                                     | <a href="#">NA open-label</a>      |
| 28 |                    |     |                                                                                                                                                                                                                                                                                                                                                          |                                    |
| 29 |                    |     |                                                                                                                                                                                                                                                                                                                                                          |                                    |
| 30 |                    |     |                                                                                                                                                                                                                                                                                                                                                          |                                    |

### 31 **Methods: Data collection, management, and analysis**

|    |                 |     |                                                                                                                                                                                                                                                                                                                                                                                                              |                           |
|----|-----------------|-----|--------------------------------------------------------------------------------------------------------------------------------------------------------------------------------------------------------------------------------------------------------------------------------------------------------------------------------------------------------------------------------------------------------------|---------------------------|
| 32 |                 |     |                                                                                                                                                                                                                                                                                                                                                                                                              |                           |
| 33 | Data collection | 18a | Plans for assessment and collection of outcome, baseline, and other trial data, including any related processes to promote data quality (eg, duplicate measurements, training of assessors) and a description of study instruments (eg, questionnaires, laboratory tests) along with their reliability and validity, if known. Reference to where data collection forms can be found, if not in the protocol | <a href="#">__13-17__</a> |
| 34 | methods         |     |                                                                                                                                                                                                                                                                                                                                                                                                              |                           |
| 35 |                 |     |                                                                                                                                                                                                                                                                                                                                                                                                              |                           |
| 36 |                 |     |                                                                                                                                                                                                                                                                                                                                                                                                              |                           |
| 37 |                 |     |                                                                                                                                                                                                                                                                                                                                                                                                              |                           |
| 38 |                 |     |                                                                                                                                                                                                                                                                                                                                                                                                              |                           |
| 39 |                 | 18b | Plans to promote participant retention and complete follow-up, including list of any outcome data to be collected for participants who discontinue or deviate from intervention protocols                                                                                                                                                                                                                    | <a href="#">__10-11__</a> |
| 40 |                 |     |                                                                                                                                                                                                                                                                                                                                                                                                              |                           |
| 41 |                 |     |                                                                                                                                                                                                                                                                                                                                                                                                              |                           |
| 42 |                 |     |                                                                                                                                                                                                                                                                                                                                                                                                              |                           |

|    |                                 |     |                                                                                                                                                                                                                                                                                                                                       |                              |
|----|---------------------------------|-----|---------------------------------------------------------------------------------------------------------------------------------------------------------------------------------------------------------------------------------------------------------------------------------------------------------------------------------------|------------------------------|
| 1  | Data management                 | 19  | Plans for data entry, coding, security, and storage, including any related processes to promote data quality (eg, double data entry; range checks for data values). Reference to where details of data management procedures can be found, if not in the protocol                                                                     | <a href="#">11; 16-17</a>    |
| 2  |                                 |     |                                                                                                                                                                                                                                                                                                                                       |                              |
| 3  |                                 |     |                                                                                                                                                                                                                                                                                                                                       |                              |
| 4  |                                 |     |                                                                                                                                                                                                                                                                                                                                       |                              |
| 5  | Statistical methods             | 20a | Statistical methods for analysing primary and secondary outcomes. Reference to where other details of the statistical analysis plan can be found, if not in the protocol                                                                                                                                                              | <a href="#">13-14; S3-4</a>  |
| 6  |                                 |     |                                                                                                                                                                                                                                                                                                                                       |                              |
| 7  |                                 |     |                                                                                                                                                                                                                                                                                                                                       |                              |
| 8  |                                 | 20b | Methods for any additional analyses (eg, subgroup and adjusted analyses)                                                                                                                                                                                                                                                              | <a href="#">13-14</a>        |
| 9  |                                 |     |                                                                                                                                                                                                                                                                                                                                       |                              |
| 10 |                                 | 20c | Definition of analysis population relating to protocol non-adherence (eg, as randomised analysis), and any statistical methods to handle missing data (eg, multiple imputation)                                                                                                                                                       | <a href="#">13-14</a>        |
| 11 |                                 |     |                                                                                                                                                                                                                                                                                                                                       |                              |
| 12 |                                 |     |                                                                                                                                                                                                                                                                                                                                       |                              |
| 13 |                                 |     |                                                                                                                                                                                                                                                                                                                                       |                              |
| 14 | <b>Methods: Monitoring</b>      |     |                                                                                                                                                                                                                                                                                                                                       |                              |
| 15 |                                 |     |                                                                                                                                                                                                                                                                                                                                       |                              |
| 16 | Data monitoring                 | 21a | Composition of data monitoring committee (DMC); summary of its role and reporting structure; statement of whether it is independent from the sponsor and competing interests; and reference to where further details about its charter can be found, if not in the protocol. Alternatively, an explanation of why a DMC is not needed | <a href="#">16-17; fig 2</a> |
| 17 |                                 |     |                                                                                                                                                                                                                                                                                                                                       |                              |
| 18 |                                 |     |                                                                                                                                                                                                                                                                                                                                       |                              |
| 19 |                                 |     |                                                                                                                                                                                                                                                                                                                                       |                              |
| 20 |                                 |     |                                                                                                                                                                                                                                                                                                                                       |                              |
| 21 |                                 |     |                                                                                                                                                                                                                                                                                                                                       |                              |
| 22 |                                 | 21b | Description of any interim analyses and stopping guidelines, including who will have access to these interim results and make the final decision to terminate the trial                                                                                                                                                               | <a href="#">11-15</a>        |
| 23 |                                 |     |                                                                                                                                                                                                                                                                                                                                       |                              |
| 24 |                                 |     |                                                                                                                                                                                                                                                                                                                                       |                              |
| 25 | Harms                           | 22  | Plans for collecting, assessing, reporting, and managing solicited and spontaneously reported adverse events and other unintended effects of trial interventions or trial conduct                                                                                                                                                     | <a href="#">11-15</a>        |
| 26 |                                 |     |                                                                                                                                                                                                                                                                                                                                       |                              |
| 27 |                                 |     |                                                                                                                                                                                                                                                                                                                                       |                              |
| 28 | Auditing                        | 23  | Frequency and procedures for auditing trial conduct, if any, and whether the process will be independent from investigators and the sponsor                                                                                                                                                                                           | <a href="#">14-17; fig 2</a> |
| 29 |                                 |     |                                                                                                                                                                                                                                                                                                                                       |                              |
| 30 |                                 |     |                                                                                                                                                                                                                                                                                                                                       |                              |
| 31 |                                 |     |                                                                                                                                                                                                                                                                                                                                       |                              |
| 32 | <b>Ethics and dissemination</b> |     |                                                                                                                                                                                                                                                                                                                                       |                              |
| 33 |                                 |     |                                                                                                                                                                                                                                                                                                                                       |                              |
| 34 | Research ethics approval        | 24  | Plans for seeking research ethics committee/institutional review board (REC/IRB) approval                                                                                                                                                                                                                                             | <a href="#">3; 15</a>        |
| 35 |                                 |     |                                                                                                                                                                                                                                                                                                                                       |                              |
| 36 |                                 |     |                                                                                                                                                                                                                                                                                                                                       |                              |
| 37 | Protocol amendments             | 25  | Plans for communicating important protocol modifications (eg, changes to eligibility criteria, outcomes, analyses) to relevant parties (eg, investigators, REC/IRBs, trial participants, trial registries, journals, regulators)                                                                                                      | <a href="#">3; 15-16</a>     |
| 38 |                                 |     |                                                                                                                                                                                                                                                                                                                                       |                              |
| 39 |                                 |     |                                                                                                                                                                                                                                                                                                                                       |                              |
| 40 |                                 |     |                                                                                                                                                                                                                                                                                                                                       |                              |
| 41 |                                 |     |                                                                                                                                                                                                                                                                                                                                       |                              |
| 42 |                                 |     |                                                                                                                                                                                                                                                                                                                                       |                              |
| 43 |                                 |     |                                                                                                                                                                                                                                                                                                                                       |                              |
| 44 |                                 |     |                                                                                                                                                                                                                                                                                                                                       |                              |
| 45 |                                 |     |                                                                                                                                                                                                                                                                                                                                       |                              |
| 46 |                                 |     |                                                                                                                                                                                                                                                                                                                                       |                              |

|    |                               |     |                                                                                                                                                                                                                                                                                     |                                                                                    |
|----|-------------------------------|-----|-------------------------------------------------------------------------------------------------------------------------------------------------------------------------------------------------------------------------------------------------------------------------------------|------------------------------------------------------------------------------------|
| 1  | Consent or assent             | 26a | Who will obtain informed consent or assent from potential trial participants or authorised surrogates, and how (see Item 32)                                                                                                                                                        | <a href="#">8; 15</a>                                                              |
| 2  |                               |     |                                                                                                                                                                                                                                                                                     |                                                                                    |
| 3  |                               |     |                                                                                                                                                                                                                                                                                     |                                                                                    |
| 4  |                               | 26b | Additional consent provisions for collection and use of participant data and biological specimens in ancillary studies, if applicable                                                                                                                                               | <a href="#">12; 15</a>                                                             |
| 5  |                               |     |                                                                                                                                                                                                                                                                                     |                                                                                    |
| 6  |                               |     |                                                                                                                                                                                                                                                                                     |                                                                                    |
| 7  | Confidentiality               | 27  | How personal information about potential and enrolled participants will be collected, shared, and maintained in order to protect confidentiality before, during, and after the trial                                                                                                | <a href="#">15-17</a>                                                              |
| 8  |                               |     |                                                                                                                                                                                                                                                                                     |                                                                                    |
| 9  |                               |     |                                                                                                                                                                                                                                                                                     |                                                                                    |
| 10 | Declaration of interests      | 28  | Financial and other competing interests for principal investigators for the overall trial and each study site                                                                                                                                                                       | <a href="#">20</a>                                                                 |
| 11 |                               |     |                                                                                                                                                                                                                                                                                     |                                                                                    |
| 12 |                               |     |                                                                                                                                                                                                                                                                                     |                                                                                    |
| 13 | Access to data                | 29  | Statement of who will have access to the final trial dataset, and disclosure of contractual agreements that limit such access for investigators                                                                                                                                     | <a href="#">15</a>                                                                 |
| 14 |                               |     |                                                                                                                                                                                                                                                                                     |                                                                                    |
| 15 |                               |     |                                                                                                                                                                                                                                                                                     |                                                                                    |
| 16 |                               |     |                                                                                                                                                                                                                                                                                     |                                                                                    |
| 17 | Ancillary and post-trial care | 30  | Provisions, if any, for ancillary and post-trial care, and for compensation to those who suffer harm from trial participation                                                                                                                                                       | <a href="#">NA – Public Health intervention endorsed by the Ministry of Health</a> |
| 18 |                               |     |                                                                                                                                                                                                                                                                                     |                                                                                    |
| 19 |                               |     |                                                                                                                                                                                                                                                                                     |                                                                                    |
| 20 |                               |     |                                                                                                                                                                                                                                                                                     |                                                                                    |
| 21 |                               |     |                                                                                                                                                                                                                                                                                     |                                                                                    |
| 22 | Dissemination policy          | 31a | Plans for investigators and sponsor to communicate trial results to participants, healthcare professionals, the public, and other relevant groups (eg, via publication, reporting in results databases, or other data sharing arrangements), including any publication restrictions | <a href="#">3; 16</a>                                                              |
| 23 |                               |     |                                                                                                                                                                                                                                                                                     |                                                                                    |
| 24 |                               |     |                                                                                                                                                                                                                                                                                     |                                                                                    |
| 25 |                               |     |                                                                                                                                                                                                                                                                                     |                                                                                    |
| 26 |                               |     |                                                                                                                                                                                                                                                                                     |                                                                                    |
| 27 |                               | 31b | Authorship eligibility guidelines and any intended use of professional writers                                                                                                                                                                                                      | <a href="#">20</a>                                                                 |
| 28 |                               |     |                                                                                                                                                                                                                                                                                     |                                                                                    |
| 29 |                               | 31c | Plans, if any, for granting public access to the full protocol, participant-level dataset, and statistical code                                                                                                                                                                     | <a href="#">NA – shared with the Kiribati Ministry of Health</a>                   |
| 30 |                               |     |                                                                                                                                                                                                                                                                                     |                                                                                    |
| 31 |                               |     |                                                                                                                                                                                                                                                                                     |                                                                                    |
| 32 |                               |     |                                                                                                                                                                                                                                                                                     |                                                                                    |
| 33 |                               |     |                                                                                                                                                                                                                                                                                     |                                                                                    |
| 34 | <b>Appendices</b>             |     |                                                                                                                                                                                                                                                                                     |                                                                                    |
| 35 |                               |     |                                                                                                                                                                                                                                                                                     |                                                                                    |
| 36 | Informed consent materials    | 32  | Model consent form and other related documentation given to participants and authorised surrogates                                                                                                                                                                                  | <a href="#">figs S5-8</a>                                                          |
| 37 |                               |     |                                                                                                                                                                                                                                                                                     |                                                                                    |
| 38 |                               |     |                                                                                                                                                                                                                                                                                     |                                                                                    |
| 39 |                               |     |                                                                                                                                                                                                                                                                                     |                                                                                    |
| 40 |                               |     |                                                                                                                                                                                                                                                                                     |                                                                                    |
| 41 |                               |     |                                                                                                                                                                                                                                                                                     |                                                                                    |
| 42 |                               |     |                                                                                                                                                                                                                                                                                     |                                                                                    |
| 43 |                               |     |                                                                                                                                                                                                                                                                                     |                                                                                    |
| 44 |                               |     |                                                                                                                                                                                                                                                                                     |                                                                                    |
| 45 |                               |     |                                                                                                                                                                                                                                                                                     |                                                                                    |
| 46 |                               |     |                                                                                                                                                                                                                                                                                     |                                                                                    |

|                            |                      |                                                                                                                                                                                                   |                                                                     |
|----------------------------|----------------------|---------------------------------------------------------------------------------------------------------------------------------------------------------------------------------------------------|---------------------------------------------------------------------|
| 1<br>2<br>3<br>4<br>5<br>6 | Biological specimens | 33 Plans for collection, laboratory evaluation, and storage of biological specimens for genetic or molecular analysis in the current trial and for future use in ancillary studies, if applicable | NA – subject to separate ethics/studies will be reported separately |
|----------------------------|----------------------|---------------------------------------------------------------------------------------------------------------------------------------------------------------------------------------------------|---------------------------------------------------------------------|

7  
8 \*It is strongly recommended that this checklist be read in conjunction with the SPIRIT 2013 Explanation & Elaboration for important clarification on the items.  
9 Amendments to the protocol should be tracked and dated. The SPIRIT checklist is copyrighted by the SPIRIT Group under the Creative Commons  
10 [“Attribution-NonCommercial-NoDerivs 3.0 Unported”](#) license.  
11

12  
13  
14  
15  
16  
17  
18  
19  
20  
21  
22  
23  
24  
25  
26  
27  
28  
29  
30  
31  
32  
33  
34  
35  
36  
37  
38  
39  
40  
41  
42  
43  
44  
45  
46

For peer review only
